# Supplementary material for: Aurora kinase A promotes trained immunity via regulation of endogenous S-adenosylmethionine metabolism
Source: eLife journal article supplement (doi:10.7554/elife.104138), 2025-01-08
Supplement: fig6-data1 [file a1.xlsx]

## Sheet: ROI Statistics
FileName	Time (ms)	Z Pos	X Pos	Y Pos	ROI ID	ROI Area [µm²]	ROI Mean Intensity	ROI Min Intensity	ROI Max Intensity	ROI Sum Intensity	ROI StDev Intensity	ROI Signal/Background	Area Fraction	Unit	Channel
a 010.nd2	1880.08	6732.05	-8887.5	3577.9	1	131.067	1531.35	424	4095	16587554	485.999	9.65802	0	µm	488			200709
a 010.nd2	1880.08	6732.05	-8887.5	3577.9	2	17.6781	963.307	373	4095	1407392	630.807	10.9786	0	µm	488			17029.4
a 010.nd2	1880.08	6732.05	-8887.5	3577.9	3	50.2513	1204.65	333	2557	5002928	353.932	7.67868	0	µm	488			60535.4
a 010.nd2	1880.08	6732.05	-8887.5	3577.9	4	48.4847	1304.38	640	3009	5226656	324.429	4.70156	0	µm	488			63242.5
a 010.nd2	1880.08	6732.05	-8887.5	3577.9	5	31.4358	2050.18	466	4095	5326360	701.528	8.78755	0	µm	488			64449
a 010.nd2	1880.08	6732.05	-8887.5	3577.9	6	53.2763	966.955	248	3450	4257503	427.287	13.9113	0	µm	488			51515.8
a 010.nd2	1880.08	6732.05	-8887.5	3577.9	7	63.4645	1243.25	329	3509	6520824	517.995	10.6657	0	µm	488			78902
a 012.nd2	580.039	6732.06	-8730.6	3660.5	1	87.1684	1981.79	587	4095	14276819	642.538	6.97615	0	µm	488			172750
a 012.nd2	580.039	6732.06	-8730.6	3660.5	2	37.3164	1918.38	631	4017	5916291	523.01	6.36609	0	µm	488			71587.1
a 012.nd2	580.039	6732.06	-8730.6	3660.5	3	62.9805	1815.31	490	4095	9448710	742.755	8.35714	0	µm	488			114329
a 012.nd2	580.039	6732.06	-8730.6	3660.5	4	66.1628	1813.27	824	4095	9914944	503.326	4.88081	0	µm	488			119971
a 012.nd2	580.039	6732.06	-8730.6	3660.5	5	43.5479	1507.32	562	3660	5424836	515.981	6.51246	0	µm	488			65640.5
a 012.nd2	580.039	6732.06	-8730.6	3660.5	6	74.6086	2288.6	523	4095	14111482	741.886	7.82983	0	µm	488			170749
a 012.nd2	580.039	6732.06	-8730.6	3660.5	7	102.378	1611.47	325	4095	13634623	779.726	12.6	0	µm	488			164979
a 012.nd2	580.039	6732.06	-8730.6	3660.5	8	113.958	1225.23	299	4095	11539227	344.219	13.6957	0	µm	488			139625
a 012.nd2	580.039	6732.06	-8730.6	3660.5	9	64.2268	1188.35	450	2696	6307751	315.707	5.99111	0	µm	488			76323.8
a 012.nd2	580.039	6732.06	-8730.6	3660.5	10	41.1763	1546.21	438	4095	5261763	579.041	9.34932	0	µm	488			63667.3
a 012.nd2	580.039	6732.06	-8730.6	3660.5	11	17.2304	1819.29	562	3504	2590663	530.364	6.23487	0	µm	488			31347
a 012.nd2	580.039	6732.06	-8730.6	3660.5	12	41.8418	1684.96	642	3186	5826589	399.904	4.96262	0	µm	488			70501.7
a 012.nd2	580.039	6732.06	-8730.6	3660.5	13	74.0278	1193.77	512	2893	7303489	380.513	5.65039	0	µm	488			88372.2
a 012.nd2	580.039	6732.06	-8730.6	3660.5	14	34.5576	1331.91	367	3749	3803940	662.051	10.2153	0	µm	488			46027.7
a 012.nd2	580.039	6732.06	-8730.6	3660.5	15	45.6049	1611.63	530	3650	6074246	574.646	6.88679	0	µm	488			73498.4
a 012.nd2	580.039	6732.06	-8730.6	3660.5	16	142.49	2152.77	713	4095	25351035	800.557	5.22989	0	µm	488			306748
a 012.nd2	580.039	6732.06	-8730.6	3660.5	17	52.0663	2345.48	586	4095	10092620	697.134	6.98806	0	µm	488			122121
a 012.nd2	2856.46	6732.06	-8048.7	3125.3	1	103.455	2116.94	285	4095	18099870	846.004	14.1695	0	µm	488			219008
a 012.nd2	2856.46	6732.06	-8048.7	3125.3	2	66.9614	2437.33	554	4095	13488176	679.031	7.3917	0	µm	488			163207
a 012.nd2	2856.46	6732.06	-8048.7	3125.3	3	79.0614	1355.29	537	3345	8855474	495.441	6.22905	0	µm	488			107151
a 012.nd2	2856.46	6732.06	-8048.7	3125.3	4	104.06	1755.32	439	4095	15095727	812.658	9.32802	0	µm	488			182658
a 012.nd2	2856.46	6732.06	-8048.7	3125.3	5	61.4559	2162.8	460	4095	10984850	704.566	8.90217	0	µm	488			132917
a 012.nd2	2856.46	6732.06	-8048.7	3125.3	6	71.1601	1483.56	572	3863	8724799	496.337	6.7535	0	µm	488			105570
a 012.nd2	2856.46	6732.06	-8048.7	3125.3	7	47.2989	1865.85	498	4095	7293596	646.995	8.22289	0	µm	488			88252.5
a 012.nd2	2856.46	6732.06	-8048.7	3125.3	8	57.7291	1202.41	298	3815	5736714	531.912	12.802	0	µm	488			69414.2
a 012.nd2	2856.46	6732.06	-8048.7	3125.3	9	40.6681	1513.88	421	3396	5088150	471.922	8.06651	0	µm	488			61566.6
a 012.nd2	4930.56	6732.39	-7741.6	3241.3	1	113.498	1773.65	506	4095	16636802	665.934	8.09289	0	µm	488			201305
a 012.nd2	4930.56	6732.39	-7741.6	3241.3	2	60.8146	1890.63	424	4095	9502282	995.164	9.65802	0	µm	488			114978
a 012.nd2	4930.56	6732.39	-7741.6	3241.3	3	53.3489	2175.64	395	4095	9592385	922.115	10.3671	0	µm	488			116068
a 012.nd2	4930.56	6732.39	-7741.6	3241.3	4	62.6538	2220.24	630	4095	11496392	775.911	6.5	0	µm	488			139106
a 012.nd2	4930.56	6732.39	-7741.6	3241.3	5	76.109	1851.23	573	4095	11644223	756.117	7.1466	0	µm	488			140895
a 012.nd2	4930.56	6732.39	-7741.6	3241.3	6	25.9545	1376	383	3130	2951520	483.714	8.17232	0	µm	488			35713.4
a 012.nd2	7115.92	6731.77	-8160.6	2931.4	1	84.5669	1561.92	467	4095	10916250	580.416	8.76874	0	µm	488			132087
a 012.nd2	7115.92	6731.77	-8160.6	2931.4	2	65.461	1011.38	352	3364	5471574	415.892	9.55682	0	µm	488			66206
a 012.nd2	7115.92	6731.77	-8160.6	2931.4	3	38.0666	1657.83	468	4095	5215529	636.818	8.75	0	µm	488			63107.9
a 012.nd2	7115.92	6731.77	-8160.6	2931.4	4	64.5898	1501.57	488	4095	8015354	548.257	7.35189	0	µm	488			96985.8
a 012.nd2	7115.92	6731.77	-8160.6	2931.4	5	53.966	1886.09	519	4095	8411950	784.908	7.89017	0	µm	488			101785
a 012.nd2	7115.92	6731.77	-8160.6	2931.4	6	76.23	1373.11	381	4095	8650575	784.34	10.748	0	µm	488			104672
a 012.nd2	7115.92	6731.77	-8160.6	2931.4	7	41.5393	1564.82	260	4095	5372042	834.74	15.75	0	µm	488			65001.7
a 012.nd2	7115.92	6731.77	-8160.6	2931.4	8	120.843	1239.21	263	4095	12376023	722.633	14.419	0	µm	488			149750
a 012.nd2	7115.92	6731.77	-8160.6	2931.4	9	93.0974	1341.69	417	3358	10322984	462.075	8.05276	0	µm	488			124908
a 012.nd2	7115.92	6731.77	-8160.6	2931.4	10	37.6189	1912.51	630	3991	5946007	492.843	6.33492	0	µm	488			71946.7
a 013.nd2	1962.04	6732.1	-8064.7	3121.6	1	95.227	2099.74	302	4095	16524970	805.999	12.2239	0	µm	488			199952
a 013.nd2	1962.04	6732.1	-8064.7	3121.6	2	111.042	1576.15	350	4095	14464351	673.907	10.3409	0	µm	488			175019
a 013.nd2	1962.04	6732.1	-8064.7	3121.6	3	22.99	1842.03	577	3901	3499862	491.289	6.76083	0	µm	488			42348.3
a 013.nd2	1962.04	6732.1	-8064.7	3121.6	4	49.8278	2143.01	609	4095	8824896	753.915	6.72414	0	µm	488			106781
a 013.nd2	1962.04	6732.1	-8064.7	3121.6	5	63.6944	1931.74	464	3860	10168690	571.103	8.31897	0	µm	488			123041
a 013.nd2	1962.04	6732.1	-8064.7	3121.6	6	43.318	1314.13	466	4095	4704570	479.227	8.78755	0	µm	488			56925.3
a 013.nd2	4229.93	6730.29	-8840	3184.4	1	167.621	1382.45	419	4095	19151122	453.265	8.40862	0	µm	488			231729
a 013.nd2	4229.93	6730.29	-8840	3184.4	2	91.8511	1574.35	337	3922	11950858	499.923	11.638	0	µm	488			144605
a 013.nd2	4229.93	6730.29	-8840	3184.4	3	35.0295	1434.55	558	3599	4153011	430.769	6.44982	0	µm	488			50251.4
a 013.nd2	4229.93	6730.29	-8840	3184.4	4	53.9297	932.506	287	4095	4156180	545.638	12.678	0	µm	488			50289.8
a 013.nd2	4229.93	6730.29	-8840	3184.4	5	30.3226	1342.98	643	3826	3365497	505.348	5.95023	0	µm	488			40722.5
a 013.nd2	4229.93	6730.29	-8840	3184.4	6	50.6748	1223.81	449	2722	5125296	361.576	6	0	µm	488			62016.1
a 013.nd2	6251.04	6730.44	-8780.6	3052.1	1	29.7418	1949.1	718	4095	4790898	823.169	5.70334	0	µm	488			57969.9
a 013.nd2	6251.04	6730.44	-8780.6	3052.1	2	42.4952	1884.26	434	4095	6617506	1099.29	9.43548	0	µm	488			80071.8
a 013.nd2	6251.04	6730.44	-8780.6	3052.1	3	46.6455	1724.4	413	4095	6647560	959.37	9.91525	0	µm	488			80435.5
a 013.nd2	6251.04	6730.44	-8780.6	3052.1	4	55.3696	1665.11	327	3868	7619544	606.416	11.8287	0	µm	488			92196.5
a 013.nd2	6251.04	6730.44	-8780.6	3052.1	5	105.657	1917.89	415	4095	16747027	754.222	9.28571	0	µm	488			202639
a 013.nd2	6251.04	6730.44	-8780.6	3052.1	6	107.629	1659.01	386	4095	14756872	617.632	10.6088	0	µm	488			178558
a 013.nd2	6251.04	6730.44	-8780.6	3052.1	7	130.281	1437.87	334	3516	15481545	637.132	10.5269	0	µm	488			187327
a 013.nd2	6251.04	6730.44	-8780.6	3052.1	8	71.753	1221.09	419	3799	7241076	473.122	9.06683	0	µm	488			87617
a 013.nd2	6251.04	6730.44	-8780.6	3052.1	9	82.764	2243.61	485	4095	15346273	829.212	8.4433	0	µm	488			185690
a 013.nd2	6251.04	6730.44	-8780.6	3052.1	10	101.083	1619.84	511	4095	13532151	598.943	8.0137	0	µm	488			163739
a 013.nd2	6251.04	6730.44	-8780.6	3052.1	11	51.6549	1509.39	551	4095	6443597	604.968	7.43194	0	µm	488			77967.5
a 013.nd2	8378.18	6730.89	-9028.3	2815.6	1	79.5454	1952.12	602	3973	12833255	586.031	6.59967	0	µm	488			155282
a 013.nd2	8378.18	6730.89	-9028.3	2815.6	2	51.1346	1837.87	658	4095	7766820	602.771	6.2234	0	µm	488			93978.5
a 013.nd2	8378.18	6730.89	-9028.3	2815.6	3	160.277	1606.3	439	4095	21277059	536.148	9.32802	0	µm	488			257452
a 013.nd2	8378.18	6730.89	-9028.3	2815.6	4	92.2383	1908.08	512	4095	14545305	804.938	7.99805	0	µm	488			175998
a 013.nd2	8378.18	6730.89	-9028.3	2815.6	5	47.19	1084.03	471	2829	4227721	402.303	6.00637	0	µm	488			51155.4
a 013.nd2	8378.18	6730.89	-9028.3	2815.6	6	69.4056	1631.41	412	4095	9357769	563.847	8.34012	0	µm	488			113229
a 013.nd2	8378.18	6730.89	-9028.3	2815.6	7	164.85	1437.48	509	4095	19584229	417.803	7.3125	0	µm	488			236969
a 013.nd2	8378.18	6730.89	-9028.3	2815.6	8	53.0464	1738.34	347	4095	7620896	686.81	11.8012	0	µm	488			92212.8
a 013.nd2	8378.18	6730.89	-9028.3	2815.6	9	85.5591	1630.21	445	4095	11527197	571.747	9.20225	0	µm	488			139479
a 013.nd2	10544.8	6732.53	-8960.6	2157.3	1	182.153	1833.18	370	4095	27596747	702.142	9.50116	0	µm	488			333921
a 013.nd2	10544.8	6732.53	-8960.6	2157.3	2	108.731	2164.01	522	4095	19445786	847.286	7.84483	0	µm	488			235294
a 013.nd2	10544.8	6732.53	-8960.6	2157.3	3	32.186	2425.65	478	4095	6452241	845.284	8.56695	0	µm	488			78072.1
a 013.nd2	10544.8	6732.53	-8960.6	2157.3	4	90.6774	1492.98	420	3865	11188409	567.27	9.20238	0	µm	488			135380
a 013.nd2	10544.8	6732.53	-8960.6	2157.3	5	21.2234	1771.76	458	3981	3107666	627.259	8.69214	0	µm	488			37602.8
a 013.nd2	10544.8	6732.53	-8960.6	2157.3	6	174.155	1442.85	318	4095	20766938	590.679	11.4706	0	µm	488			251280
a 013.nd2	10544.8	6732.53	-8960.6	2157.3	7	25.2769	1648.69	446	4095	3444119	589.59	9.18161	0	µm	488			41673.8
a 014.nd2	1967.22	6730.92	-9085.9	1956.4	1	82.3768	1540.06	380	4095	10484757	634.851	10.7763	0	µm	488			126866
a 014.nd2	1967.22	6730.92	-9085.9	1956.4	2	38.1029	1828	782	3710	5756360	469.796	4.74425	0	µm	488			69652
a 014.nd2	1967.22	6730.92	-9085.9	1956.4	3	60.1975	1336.58	425	4095	6649492	645.769	9.63529	0	µm	488			80458.9
a 014.nd2	1967.22	6730.92	-9085.9	1956.4	4	29.8386	1266.61	379	2979	3123459	368.358	7.86016	0	µm	488			37793.9
a 014.nd2	1967.22	6730.92	-9085.9	1956.4	5	85.5349	1621.3	492	4095	11460979	506.642	8.32317	0	µm	488			138678
a 014.nd2	1967.22	6730.92	-9085.9	1956.4	6	64.3478	1577.55	338	3938	8389433	577.923	11.6509	0	µm	488			101512
a 014.nd2	3967.01	6729.81	-8910.7	1931.9	1	41.0311	1091.15	319	3039	3700102	414.221	9.25392	0	µm	488			44771.2
a 014.nd2	3967.01	6729.81	-8910.7	1931.9	2	28.7012	1612.26	479	4095	3824281	859.89	8.54906	0	µm	488			46273.8
a 014.nd2	3967.01	6729.81	-8910.7	1931.9	3	29.3062	1396.71	549	3431	3382820	525.282	6.24955	0	µm	488			40932.1
a 014.nd2	3967.01	6729.81	-8910.7	1931.9	4	64.8076	1108.15	311	3082	5935272	459.874	9.90997	0	µm	488			71816.8
a 014.nd2	3967.01	6729.81	-8910.7	1931.9	5	118.084	1275.47	310	4012	12447323	402.431	12.9419	0	µm	488			150613
a 014.nd2	5989.97	6730.64	-8590.4	1714.2	1	100.2	1861.24	335	4095	15412923	920.066	12.2239	0	µm	488			186496
a 014.nd2	5989.97	6730.64	-8590.4	1714.2	2	71.4384	1193.52	388	3790	7046544	475.837	9.76804	0	µm	488			85263.2
a 014.nd2	8036.08	6731.59	-8657.9	1923.4	1	61.3833	1801.36	429	3736	9138296	557.22	8.70862	0	µm	488			110573
a 014.nd2	8036.08	6731.59	-8657.9	1923.4	2	65.3158	1160.49	359	3199	6264310	420.777	8.91086	0	µm	488			75798.2
a 014.nd2	8036.08	6731.59	-8657.9	1923.4	3	18.3194	1194.02	397	3373	1807739	580.196	8.49622	0	µm	488			21873.6
a 014.nd2	8036.08	6731.59	-8657.9	1923.4	4	41.5151	1368.59	529	4095	4695623	442.386	7.51376	0	µm	488			56817
a 014.nd2	8036.08	6731.59	-8657.9	1923.4	5	44.2376	1141.93	431	4061	4174900	490.284	9.42227	0	µm	488			50516.3
a 014.nd2	8036.08	6731.59	-8657.9	1923.4	6	173.962	1464.27	392	4095	21051758	537.131	9.9878	0	µm	488			254726
a 014.nd2	8036.08	6731.59	-8657.9	1923.4	7	188.748	1474.38	336	4095	22998915	623.555	10.6088	0	µm	488			278287
a 014.nd2	8036.08	6731.59	-8657.9	1923.4	8	66.429	1156.69	365	2653	6350216	467.173	7.26849	0	µm	488			76837.6
a 014.nd2	10110.6	6731.91	-8716.9	1565.3	1	143.252	1644.31	256	3857	19467012	624.931	11.9412	0	µm	488			235551
a 014.nd2	10110.6	6731.91	-8716.9	1565.3	2	122.004	1152.72	454	2332	11622850	321.897	4.66667	0	µm	488			140636
a 014.nd2	10110.6	6731.91	-8716.9	1565.3	3	96.6548	1237.32	291	2844	9883734	418.033	9.7732	0	µm	488			119593
a 014.nd2	10110.6	6731.91	-8716.9	1565.3	4	142.671	1230.99	347	3982	14514589	433.441	7.82353	0	µm	488			175627
a 014.nd2	10110.6	6731.91	-8716.9	1565.3	5	103.31	1663.01	357	4095	14198807	723.148	10.891	0	µm	488			171806
a 014.nd2	10110.6	6731.91	-8716.9	1565.3	6	115.882	1020.76	345	2796	9775811	359.5	8.10435	0	µm	488			118287
a 014.nd2	12240.5	6731.26	-8635.7	1391.2	1	163.12	1282.19	374	4095	17285195	460.402	7.10478	0	µm	488			209151
a 014.nd2	12240.5	6731.26	-8635.7	1391.2	2	118.774	1453.15	554	3949	14264152	498.606	6.77358	0	µm	488			172596
a 014.nd2	12240.5	6731.26	-8635.7	1391.2	3	123.989	901.601	267	2327	9238703	326.689	8.65056	0	µm	488			111788
a 014.nd2	14366.4	6731.49	-8678.5	1213.2	1	83.9377	1718.64	574	3939	11922205	549.208	6.565	0	µm	488			144259
a 014.nd2	14366.4	6731.49	-8678.5	1213.2	2	119.705	1430.59	457	3312	14152805	436.899	7.16883	0	µm	488			171249
a 014.nd2	14366.4	6731.49	-8678.5	1213.2	3	50.5901	1794.35	396	4095	7502178	578.767	10.3409	0	µm	488			90776.4
a 014.nd2	16374.8	6732.24	-8882.2	1218.9	1	70.5309	1347.94	401	4095	7857133	557.722	9.82014	0	µm	488			95071.3
a 014.nd2	16374.8	6732.24	-8882.2	1218.9	2	79.1703	900.811	319	2305	5894004	324.761	6.79941	0	µm	488			71317.4
a 014.nd2	16374.8	6732.24	-8882.2	1218.9	3	157.627	1504.5	403	4095	19599132	580.804	10.1613	0	µm	488			237149
a 014.nd2	16374.8	6732.24	-8882.2	1218.9	4	197.75	1304.26	348	3555	21315580	411.54	9.33071	0	µm	488			257919
a 014.nd2	18395.6	6731.81	-8891.6	1006.2	1	111.284	1586.05	314	4095	14586929	573.419	11.4706	0	µm	488			176502
a 014.nd2	18395.6	6731.81	-8891.6	1006.2	2	63.1983	1170.69	251	3074	6114512	456.801	12.247	0	µm	488			73985.6
a 014.nd2	18395.6	6731.81	-8891.6	1006.2	3	23.9943	1260.76	490	2624	2500078	404.429	5.3551	0	µm	488			30250.9
a 014.nd2	18395.6	6731.81	-8891.6	1006.2	4	66.3564	1165.16	425	2601	6389730	327.45	6.12	0	µm	488			77315.7
a 014.nd2	18395.6	6731.81	-8891.6	1006.2	5	192.959	1045.56	246	4095	16673616	608.918	15.3371	0	µm	488			201751
a 014.nd2	18395.6	6731.81	-8891.6	1006.2	6	192.257	981.773	296	3509	15599391	358.26	10.5375	0	µm	488			188753
a 014.nd2	20414	6731.78	-8986.6	847.2	1	204.708	1499	262	4095	25360061	493.307	14.024	0	µm	488			306857
a 014.nd2	20414	6731.78	-8986.6	847.2	2	96.2797	1406.53	296	4095	11191780	481.038	12.2605	0	µm	488			135421
a 014.nd2	20414	6731.78	-8986.6	847.2	3	100.176	1244.95	446	4095	10306930	475.041	9.18161	0	µm	488			124714
a 014.nd2	20414	6731.78	-8986.6	847.2	4	72.358	1370.82	260	4095	8197479	710.276	15.75	0	µm	488			99189.5
a 015.nd2	306.024	6731.78	-8696.8	900.8	1	128.224	1171.81	371	3174	12417681	410.92	7.64819	0	µm	488			150254
a 015.nd2	306.024	6731.78	-8696.8	900.8	2	95.227	2090.26	740	4095	16450359	636.84	5.53378	0	µm	488			199049
a 015.nd2	306.024	6731.78	-8696.8	900.8	4	44.9515	1133.82	379	2819	4212131	355.158	7.43799	0	µm	488			50966.8
a 015.nd2	306.024	6731.78	-8696.8	900.8	5	35.332	1185.38	419	2600	3461307	388.139	6.20525	0	µm	488			41881.8
a 015.nd2	306.024	6731.78	-8696.8	900.8	6	66.7799	1211.92	390	3217	6688565	378.666	8.24872	0	µm	488			80931.6
a 015.nd2	306.024	6731.78	-8696.8	900.8	7	139.658	899.657	420	2169	10383843	293.51	5.07963	0	µm	488			125645
a 015.nd2	306.024	6731.78	-8696.8	900.8	8	78.7589	1521.3	476	4095	9902159	545.835	8.60294	0	µm	488			119816
a 015.nd2	306.024	6731.78	-8696.8	900.8	9	96.6064	1748.59	306	4095	13960762	581.022	13.3824	0	µm	488			168925
a 015.nd2	306.024	6731.78	-8696.8	900.8	10	98.4456	1421.43	408	4095	11564786	696.878	10.0368	0	µm	488			139934
																		121647
