# Supplementary material for: Aurora kinase A promotes trained immunity via regulation of endogenous S-adenosylmethionine metabolism
Source: eLife journal article supplement (doi:10.7554/elife.104138), 2025-01-08
Supplement: fig6-data1 [file a2.xlsx]

## Sheet: ROI Statistics
FileName	Time (ms)	Z Pos	X Pos	Y Pos	ROI ID	ROI Area [µm²]	ROI Mean Intensity	ROI Min Intensity	ROI Max Intensity	ROI Sum Intensity	ROI StDev Intensity	ROI Signal/Background	Area Fraction	Unit	Channel
A2 001_crop_crop_crop_crop_crop_crop	21689.7	7120.61	15454	3811.6	1	55.9625	1719.25	406	4095	7951553	534.871	10.0862	0	µm	488		96213.8
A2 001_crop_crop_crop_crop_crop_crop	21689.7	7120.61	15454	3811.6	2	68.486	1007.7	327	3257	5703575	466.542	9.96025	0	µm	488		69013.3
A2 001_crop_crop_crop_crop_crop_crop	21689.7	7120.61	15454	3811.6	3	144.365	1189.48	239	4095	14191652	536.058	15.9339	0	µm	488		171719
A2 001_crop_crop_crop_crop_crop_crop	21689.7	7120.61	15454	3811.6	4	86.8901	1534.31	355	4095	11017848	524.418	11.5352	0	µm	488		133316
A2 001_crop_crop_crop_crop_crop_crop	21689.7	7120.61	15454	3811.6	5	50.9168	1138.56	331	2436	4791042	376.997	7.35952	0	µm	488		57971.6
A2 001_crop_crop_crop_crop_crop_crop	21689.7	7120.61	15454	3811.6	6	50.9773	1813.87	638	3994	7641837	470.45	6.26019	0	µm	488		92466.2
A2 001_crop_crop_crop_crop_crop_crop	21689.7	7120.61	15454	3811.6	7	47.5409	1476.04	275	4095	5799374	569.841	14.8909	0	µm	488		70172.4
A2 001_crop_crop_crop_crop_crop_crop	21689.7	7120.61	15454	3811.6	8	83.1754	3250.67	494	4095	22345088	1116.82	8.28947	0	µm	488		270376
A2 001_crop_crop_crop_crop_crop_crop	21689.7	7120.61	15454	3811.6	9	34.3882	1410.45	472	4095	4008495	680.917	8.67585	0	µm	488		48502.8
A2 001_crop_crop_crop_crop_crop_crop	21689.7	7120.61	15454	3811.6	10	46.9964	1530.56	483	4095	5944695	485.747	8.47826	0	µm	488		71930.8
A2 001_crop_crop_crop_crop_crop_crop	19624.6	7120.71	15147.6	3709.4	1	47.9402	1637.88	483	4095	6489298	756.168	8.47826	0	µm	488		78520.5
A2 001_crop_crop_crop_crop_crop_crop	19624.6	7120.71	15147.6	3709.4	2	61.5043	1065.96	302	3110	5418279	383.013	10.298	0	µm	488		65561.2
A2 001_crop_crop_crop_crop_crop_crop	19624.6	7120.71	15147.6	3709.4	3	58.806	1403.82	357	2983	6822573	416.874	8.35574	0	µm	488		82553.1
A2 001_crop_crop_crop_crop_crop_crop	19624.6	7120.71	15147.6	3709.4	4	178.596	1322.64	273	3298	19522170	475.586	9.09384	0	µm	488		236218
A2 001_crop_crop_crop_crop_crop_crop	19624.6	7120.71	15147.6	3709.4	5	117.745	2160.42	268	4095	21023058	652.221	13.6047	0	µm	488		254379
A2 001_crop_crop_crop_crop_crop_crop	19624.6	7120.71	15147.6	3709.4	6	108.549	1304.61	247	3874	11703630	452.275	15.6842	0	µm	488		141614
A2 001_crop_crop_crop_crop_crop_crop	19624.6	7120.71	15147.6	3709.4	7	127.377	1711.33	422	4095	18015167	600.42	9.70379	0	µm	488		217984
A2 001_crop_crop_crop_crop_crop_crop	19624.6	7120.71	15147.6	3709.4	8	68.244	1460.18	334	4095	8235435	690.191	12.2605	0	µm	488		99648.8
A2 001_crop_crop_crop_crop_crop_crop	19624.6	7120.71	15147.6	3709.4	9	106.613	1855.8	439	4095	16351463	755.362	9.32802	0	µm	488		197853
A2 001_crop_crop_crop_crop_crop_crop	19624.6	7120.71	15147.6	3709.4	10	76.3026	1218.08	410	2973	7681206	431.889	7.25122	0	µm	488		92942.6
A2 001_crop_crop_crop_crop_crop_crop	19624.6	7120.71	15147.6	3709.4	11	81.917	1315.74	399	3093	8907577	434.298	7.75188	0	µm	488		107782
A2 001_crop_crop_crop_crop_crop_crop	19624.6	7120.71	15147.6	3709.4	12	72.7089	1322.02	435	3389	7944031	510.013	7.7908	0	µm	488		96122.8
A2 001_crop_crop_crop_crop_crop_crop	19624.6	7120.71	15147.6	3709.4	13	35.0779	1355.18	425	4095	3928676	591.168	9.63529	0	µm	488		47537
A2 001_crop_crop_crop_crop_crop_crop	19624.6	7120.71	15147.6	3709.4	14	57.3419	1386.7	521	4095	6571594	452.081	7.85989	0	µm	488		79516.3
A2 001_crop_crop_crop_crop_crop_crop	17617.4	7121.41	15037.8	3559.7	1	131.878	1452.63	392	4095	15832191	469.924	10.4464	0	µm	488		191570
A2 001_crop_crop_crop_crop_crop_crop	17617.4	7121.41	15037.8	3559.7	2	156.332	1374.86	223	4095	17763178	663.365	17.0625	0	µm	488		214934
A2 001_crop_crop_crop_crop_crop_crop	17617.4	7121.41	15037.8	3559.7	3	60.4274	1326.84	466	3221	6626255	400.432	6.91202	0	µm	488		80177.7
A2 001_crop_crop_crop_crop_crop_crop	11473.1	7124.6	15072.9	3112.8	1	67.5059	1079.92	293	4095	6024900	546.321	12.2239	0	µm	488		72901.3
A2 002.nd2	22534.1	7120.61	15454.1	3811.6	1	53.1069	1056.89	398	2441	4638712	278.778	6.13317	0	µm	488		56128.4
A2 002.nd2	22534.1	7120.61	15454.1	3811.6	2	45.7017	963.35	436	2322	3638572	327.595	5.32569	0	µm	488		44026.7
A2 002.nd2	22534.1	7120.61	15454.1	3811.6	3	63.0652	1016.82	383	2506	5299673	334.44	6.54308	0	µm	488		64126
A2 002.nd2	22534.1	7120.61	15454.1	3811.6	4	86.8175	883.224	233	2390	6337135	319.347	10.2575	0	µm	488		76679.3
A2 002.nd2	22534.1	7120.61	15454.1	3811.6	5	81.1789	1151.81	442	2618	7727508	323.762	5.92308	0	µm	488		93502.8
A2 002.nd2	22534.1	7120.61	15454.1	3811.6	6	116.971	986.026	268	3079	9531916	408.69	11.4888	0	µm	488		115336
A2 002.nd2	22534.1	7120.61	15454.1	3811.6	7	80.4166	2774.44	444	4095	18438958	1215.04	7.9207	0	µm	488		223111
A2 002.nd2	22534.1	7120.61	15454.1	3811.6	8	44.9394	916.977	384	2161	3405652	284.086	5.6276	0	µm	488		41208.4
A2 002_crop_crop_crop	14252.1	7118.95	15205.6	3783.6	1	62.8111	861.783	256	2183	4473513	346.295	8.52734	0	µm	488		54129.5
A2 002_crop_crop_crop	14252.1	7118.95	15205.6	3783.6	2	77.5973	815.426	191	2116	5229329	292.035	11.0785	0	µm	488		63274.9
A2 002_crop_crop_crop	14252.1	7118.95	15205.6	3783.6	3	56.8337	915.655	321	2403	4300833	271.5	7.48598	0	µm	488		52040.1
A2 002_crop_crop_crop	14252.1	7118.95	15205.6	3783.6	4	92.1778	999.649	396	2497	7615329	292.328	5.88915	0	µm	488		92145.5
A2 002_crop_crop_crop	14252.1	7118.95	15205.6	3783.6	5	104.205	964.944	303	2683	8310098	318.736	7.96142	0	µm	488		100552
A2 002_crop_crop_crop	14252.1	7118.95	15205.6	3783.6	6	105.996	1462.97	303	3486	12815623	401.725	9.39623	0	µm	488		155069
A2 002_crop_crop_crop	14252.1	7118.95	15205.6	3783.6	7	67.1308	813.589	273	2200	4513790	310.921	8.05861	0	µm	488		54616.9
A2 002_crop_crop_crop	14252.1	7118.95	15205.6	3783.6	8	126.457	1079.47	246	3361	11281520	387.597	10.431	0	µm	488		136506
A2 002_crop_crop_crop	12033.3	7120.26	15295.4	3601.9	1	113.631	799.035	259	1951	7503742	226.229	7.53282	0	µm	488		90795.3
A2 002_crop_crop_crop	12033.3	7120.26	15295.4	3601.9	2	42.0717	895.029	323	2034	3112015	290.015	6.10811	0	µm	488		37655.4
A2 002_crop_crop_crop	12033.3	7120.26	15295.4	3601.9	3	134.189	921.158	211	2381	10215638	312.766	9.44841	0	µm	488		123609
A2 002_crop_crop_crop	12033.3	7120.26	15295.4	3601.9	4	90.5201	1148.99	194	4095	8595557	538.487	20.1724	0	µm	488		104006
A2.001.nd2	185.316	6786.3	12777.6	769.5	1	50.5901	1266.74	377	3691	5296223	406.258	9.79045	0	µm	488		64084.3
A2.001.nd2	185.316	6786.3	12777.6	769.5	2	66.8041	1022.01	369	2621	5642492	351.556	7.10298	0	µm	488		68274.2
A2.001.nd2	185.316	6786.3	12777.6	769.5	3	68.5828	1290.73	351	3254	7315854	450.138	9.27065	0	µm	488		88521.8
A2.001.nd2	185.316	6786.3	12777.6	769.5	4	31.9803	1626.29	561	3556	4298282	489.861	6.33868	0	µm	488		52009.2
A2.001.nd2	185.316	6786.3	12777.6	769.5	5	23.4256	961.33	379	2349	1861135	313.616	6.19789	0	µm	488		22519.7
A2.001.nd2	185.316	6786.3	12777.6	769.5	6	30.1653	1022.8	394	1879	2549828	218.724	4.76904	0	µm	488		30852.9
A2.001.nd2	185.316	6786.3	12777.6	769.5	7	53.7966	1200.27	380	4095	5336412	486.043	10.7763	0	µm	488		64570.6
A2.003.nd2	271.323	6781.74	12841.2	1148.5	1	102.33	1084.17	281	2541	9168790	321.59	9.0427	0	µm	488		110942
A2.004.nd2	275.893	6781.31	12784.2	1360.5	1	64.9891	1043.61	319	2962	5605255	419.96	9.28527	0	µm	488		67823.6
A2.004.nd2	275.893	6781.31	12784.2	1360.5	2	116.208	1095.94	275	3333	10525412	591.111	12.12	0	µm	488		127357
A2.005.nd2	264.729	6782.83	12467.3	1254.7	1	124.328	965.454	325	3107	9920039	300.184	9.56	0	µm	488		120032
A2.002.nd2	158.546	6781.87	12976.7	595.2	1	63.5734	1225.93	236	3420	6441060	444.771	14.4915	0	µm	488		77936.8
A2.002.nd2	158.546	6781.87	12976.7	595.2	2	66.2233	1143.82	297	3715	6260122	406.946	12.5084	0	µm	488		75747.5
A2.002.nd2	158.546	6781.87	12976.7	595.2	3	62.9079	840.761	425	2988	4371115	242.802	7.03059	0	µm	488		52890.5
A2.002.nd2	158.546	6781.87	12976.7	595.2	4	87.0837	1248.96	316	4095	8988794	604.907	12.9589	0	µm	488		108764
A2.002.nd2	158.546	6781.87	12976.7	595.2	5	35.6224	1224.67	409	3338	3605427	396.076	8.16137	0	µm	488		43625.7
A2.006.nd2	272.438	6780.79	11996.8	1730.5	1	77.7909	980.706	354	2321	6304956	295.354	6.5565	0	µm	488		76290
A2.006.nd2	272.438	6780.79	11996.8	1730.5	2	24.5146	893.769	485	1894	1810775	186.819	3.90516	0	µm	488		21910.4
A2.007.nd2	274.546	6779.89	12188.4	1996.6	1	121.968	1156.76	417	2768	11660174	319.86	6.63789	0	µm	488		141088
A2.007.nd2	274.546	6779.89	12188.4	1996.6	2	56.7248	1155.95	291	2593	5419096	388.242	8.91065	0	µm	488		65571.1
A2.007.nd2	274.546	6779.89	12188.4	1996.6	3	155.957	804.475	199	2269	10368878	261.498	9.95175	0	µm	488		125463
A2.007.nd2	274.546	6779.89	12188.4	1996.6	4	62.1456	763.415	326	1870	3920902	219.338	5.5	0	µm	488		47442.9
A2.008.nd2	271.259	6778.6	12436.1	1862.6	1	85.789	855.072	388	2215	6062460	231.401	5.3632	0	µm	488		73355.8
A2.008.nd2	271.259	6778.6	12436.1	1862.6	2	93.9202	856.849	301	4095	6650863	355.618	13.4704	0	µm	488		80475.4
A2.008.nd2	271.259	6778.6	12436.1	1862.6	3	195.125	662.097	247	4095	10676969	190.726	13.6284	0	µm	488		129191
A2.008.nd2	271.259	6778.6	12436.1	1862.6	4	85.3292	978.275	338	3443	6898795	344.574	9.5374	0	µm	488		83475.4
A2.010.nd2	272.8	6778.58	12533	2178.4	1	139.319	1063.04	277	4095	12239868	337.48	13.0831	0	µm	488		148102
A2.010.nd2	272.8	6778.58	12533	2178.4	2	172.389	792.379	164	2148	11289022	252.233	9.01843	0	µm	488		136597
A2.011.nd2	271.309	6776.67	13020.8	2573.8	1	138.158	1165.74	196	3848	13310417	417.654	13.3167	0	µm	488		161056
A2.011.nd2	271.309	6776.67	13020.8	2573.8	2	90.4717	1045.61	233	2964	7818061	427.503	12.1475	0	µm	488		94598.5
A2.011.nd2	271.309	6776.67	13020.8	2573.8	3	100.236	1030.72	211	2407	8538475	368.534	11.4076	0	µm	488		103316
A2.011.nd2	271.309	6776.67	13020.8	2573.8	4	62.0004	1109.76	299	2698	5686396	383.339	9.02341	0	µm	488		68805.4
A2.011.nd2	271.309	6776.67	13020.8	2573.8	5	48.7509	901.58	358	2660	3632467	285.795	7.43017	0	µm	488		43952.9
A2.011.nd2	271.309	6776.67	13020.8	2573.8	6	51.8727	899.83	278	2518	3857573	306.023	9.05755	0	µm	488		46676.6
A2.012.nd2	272.991	6776.79	12950.2	2433.2	1	61.2381	1408.82	252	3206	7130020	457.98	12.7222	0	µm	488		86273.2
A2.012.nd2	272.991	6776.79	12950.2	2433.2	2	100.031	1205.98	283	4095	9969836	477.969	11.6667	0	µm	488		120635
A2.012.nd2	272.991	6776.79	12950.2	2433.2	3	67.4696	1091.43	329	2431	6085789	360.286	7.38906	0	µm	488		73638
A2.012.nd2	272.991	6776.79	12950.2	2433.2	4	150.633	1024.05	222	4095	12748421	436.684	15.4528	0	µm	488		154256
A2.012.nd2	272.991	6776.79	12950.2	2433.2	5	58.6487	890.372	214	3107	4315631	382.985	14.5187	0	µm	488		52219.1
A2.012.nd2	272.991	6776.79	12950.2	2433.2	6	87.5556	896.19	377	3675	6484831	330.013	9.74801	0	µm	488		78466.5
A2.012.nd2	272.991	6776.79	12950.2	2433.2	7	17.2425	1336.5	351	3490	1904508	429.279	9.94302	0	µm	488		23044.5
A2.012.nd2	272.991	6776.79	12950.2	2433.2	8	22.9295	1195.34	266	2414	2265170	439.042	9.07519	0	µm	488		27408.6
A2.012.nd2	272.991	6776.79	12950.2	2433.2	9	67.155	1104.58	301	2658	6130445	344.941	8.51923	0	µm	488		74178.4
A2.012.nd2	272.991	6776.79	12950.2	2433.2	10	75.4677	989.467	232	2297	6171304	338.962	9.90086	0	µm	488		74672.8
A2.012.nd2	272.991	6776.79	12950.2	2433.2	11	113.401	1107.01	222	4095	10374904	493.378	17.1339	0	µm	488		125536
A2.012.nd2	272.991	6776.79	12950.2	2433.2	12	101.834	839.557	261	3240	7065713	346.714	12.4138	0	µm	488		85495.1
A2.012.nd2	272.991	6776.79	12950.2	2433.2	13	35.7676	769.93	203	1716	2275912	248.09	8.4532	0	µm	488		27538.5
A2.012.nd2	272.991	6776.79	12950.2	2433.2	14	56.9184	1058.17	297	2199	4977633	288.541	7.40404	0	µm	488		60229.4
A2.013.nd2	271.631	6776.77	13234	2392.7	1	92.8433	995.607	290	2986	7639291	393.678	10.2966	0	µm	488		92435.4
A2.013.nd2	271.631	6776.77	13234	2392.7	2	93.1216	980.876	363	4095	7548825	319.075	11.281	0	µm	488		91340.8
A2.013.nd2	271.631	6776.77	13234	2392.7	3	95.2149	968.762	351	2789	7623185	354.706	7.62022	0	µm	488		92240.5
A2.014.nd2	266.538	6777.83	13590.7	2377.5	1	68.8611	684.365	278	1730	3894719	227.006	5.77474	0	µm	488		47126.1
A2.014.nd2	266.538	6777.83	13590.7	2377.5	2	85.4502	1002.99	269	2271	7083136	284.043	8.44238	0	µm	488		85705.9
A2.014.nd2	266.538	6777.83	13590.7	2377.5	3	204.248	1087.42	255	4095	18355650	349.146	12.9589	0	µm	488		222103
A2.014.nd2	266.538	6777.83	13590.7	2377.5	4	109.203	797.195	311	2259	7194685	281.373	6.92945	0	µm	488		87055.7
A2.014.nd2	266.538	6777.83	13590.7	2377.5	5	106.916	999.455	370	2414	8831180	323.406	6.28646	0	µm	488		106857
A2.014.nd2	266.538	6777.83	13590.7	2377.5	6	159.042	1050.03	324	3019	13801571	307.978	8.65043	0	µm	488		166999
A2.014.nd2	266.538	6777.83	13590.7	2377.5	7	142.683	860.789	182	2163	10150422	258.005	10.399	0	µm	488		122820
A2.014.nd2	266.538	6777.83	13590.7	2377.5	8	50.1182	991.986	317	2043	4108806	304.686	6.4448	0	µm	488		49716.6
A2.014.nd2	266.538	6777.83	13590.7	2377.5	9	69.333	877.803	352	2177	5029809	251.16	5.80533	0	µm	488		60860.7
A2.015.nd2	270.929	6777.1	13711.3	2129.6	1	42.0838	730.755	226	2755	2541565	366.095	12.1903	0	µm	488		30752.9
A2.015.nd2	270.929	6777.1	13711.3	2129.6	2	95.4448	1004.16	312	4095	7920853	308.467	11.375	0	µm	488		95842.3
A2.015.nd2	270.929	6777.1	13711.3	2129.6	3	80.2956	930.265	216	2866	6173241	362.291	13.2685	0	µm	488		74696.2
A2.016.nd2	276.126	6777.71	13623.6	1885.5	1	70.6277	965.162	302	3233	5633653	271.387	10.7053	0	µm	488		68167.2
A2.016.nd2	276.126	6777.71	13623.6	1885.5	2	101.108	933.955	214	2604	7804132	344.238	12.1682	0	µm	488		94430
A2.016.nd2	276.126	6777.71	13623.6	1885.5	3	47.1174	839.976	240	1891	3270865	295.084	7.87917	0	µm	488		39577.5
A2.017.nd2	267.967	6777.86	13501.5	1363.7	1	92.0205	895.037	307	1868	6806755	218.464	5.39884	0	µm	488		82361.7
A2.017.nd2	267.967	6777.86	13501.5	1363.7	2	67.4333	790.838	345	1445	4407342	220.216	3.84807	0	µm	488		53328.8
A2.017.nd2	267.967	6777.86	13501.5	1363.7	3	44.3344	942.388	236	2563	3452908	273.793	10.8602	0	µm	488		41780.2
A2.017.nd2	267.967	6777.86	13501.5	1363.7	4	44.8789	882.449	318	2077	3273002	239.523	6.53145	0	µm	488		39603.3
A2.017.nd2	267.967	6777.86	13501.5	1363.7	5	61.1534	968.953	401	2182	4897089	262.076	5.22444	0	µm	488		59254.8
A2.017.nd2	267.967	6777.86	13501.5	1363.7	6	77.319	1033.44	350	3681	6603674	396.202	8.65301	0	µm	488		79904.5
A2.017.nd2	267.967	6777.86	13501.5	1363.7	7	80.6707	805.721	326	1741	5371741	248.218	4.75683	0	µm	488		64998.1
A2.017.nd2	267.967	6777.86	13501.5	1363.7	8	145.055	763.637	268	2575	9154486	269.783	8.91004	0	µm	488		110769
A2.017.nd2	267.967	6777.86	13501.5	1363.7	9	43.5237	1054.02	363	1953	3791302	218.636	5.38016	0	µm	488		45874.8
																	91963.7
