# Supplementary material for: Aurora kinase A promotes trained immunity via regulation of endogenous S-adenosylmethionine metabolism
Source: eLife journal article supplement (doi:10.7554/elife.104138), 2025-01-08
Supplement: fig6-data1 [file a3.xlsx]

## Sheet: ROI Statistics
FileName	Time (ms)	Z Pos	X Pos	Y Pos	ROI ID	ROI Area [µm²]	ROI Mean Intensity	ROI Min Intensity	ROI Max Intensity	ROI Sum Intensity	ROI StDev Intensity	ROI Signal/Background	Area Fraction	Unit	Channel
A 013.nd2	266.068	6747.94	13325.3	1269.4	1	76.0364	713.047	287	1633	4480790	248.006	5.20064	0	µm	488		54217.6
A 013.nd2	266.068	6747.94	13325.3	1269.4	2	112.361	762.495	376	2107	7080533	195.857	5.60372	0	µm	488		85674.4
A 013.nd2	266.068	6747.94	13325.3	1269.4	3	132.592	860.801	255	2622	9432657	252.352	10.1628	0	µm	488		114135
A 013.nd2	266.068	6747.94	13325.3	1269.4	4	143.651	843.272	254	4095	10011320	343.333	14.024	0	µm	488		121137
A 011.nd2	269.44	6748.65	12235.7	1385.7	1	68.9579	992.825	315	4095	5658108	404.04	13	0	µm	488		68463.1
A 011.nd2	269.44	6748.65	12235.7	1385.7	2	67.6753	1036.73	284	3210	5798419	420.825	11.3028	0	µm	488		70160.9
A 011.nd2	269.44	6748.65	12235.7	1385.7	3	63.888	893.709	320	2859	4718782	366.159	8.93437	0	µm	488		57097.3
A 011.nd2	269.44	6748.65	12235.7	1385.7	4	73.326	942.303	340	4095	5710354	345.091	12.0441	0	µm	488		69095.3
A 011.nd2	269.44	6748.65	12235.7	1385.7	5	69.9501	827.575	290	4095	4784213	469.288	14.1207	0	µm	488		57889
A 010.nd2	270.427	6751.24	12112.1	1550.3	1	73.5196	1388.72	550	3546	8437837	409.028	5.55273	0	µm	488		102098
A 010.nd2	270.427	6751.24	12112.1	1550.3	2	54.4137	902.799	323	4095	4059888	365.519	12.678	0	µm	488		49124.6
A 010.nd2	270.427	6751.24	12112.1	1550.3	3	44.8305	1077.04	352	4095	3990417	386.935	11.6335	0	µm	488		48284
A 010.nd2	270.427	6751.24	12112.1	1550.3	4	90.0119	745.581	268	1808	5546377	256.294	6.21306	0	µm	488		67111.2
A 010.nd2	270.427	6751.24	12112.1	1550.3	5	36.5057	799.806	416	1930	2413016	182.757	4.63942	0	µm	488		29197.5
A 010.nd2	270.427	6751.24	12112.1	1550.3	6	73.2534	1028.86	256	2805	6228715	342.121	10.625	0	µm	488		75367.5
A 010.nd2	270.427	6751.24	12112.1	1550.3	7	52.6229	1309.52	363	4095	5695108	539.027	10.4731	0	µm	488		68910.8
A 010.nd2	270.427	6751.24	12112.1	1550.3	8	59.5562	756.537	383	1745	3723674	209.358	4.34987	0	µm	488		45056.5
A 009.nd2	296.739	6751.46	11989.9	1569	1	142.865	1071.46	268	4095	12650734	411.439	15.2799	0	µm	488		153074
A 009.nd2	296.739	6751.46	11989.9	1569	2	84.9541	1165.67	434	3139	8184144	364.681	5.92008	0	µm	488		99028.1
A 009.nd2	296.739	6751.46	11989.9	1569	3	40.6318	1019.04	391	2826	3421920	350.487	7.22762	0	µm	488		41405.2
A 009.nd2	296.739	6751.46	11989.9	1569	4	66.2233	1121.15	325	3280	6136073	386.822	8.12836	0	µm	488		74246.5
A 009.nd2	296.739	6751.46	11989.9	1569	5	72.7694	1058.22	270	4095	6364151	403.546	15.1667	0	µm	488		77006.2
A 009.nd2	296.739	6751.46	11989.9	1569	6	80.5013	1122.06	325	4095	7465079	569.173	12.6	0	µm	488		90327.5
A 009.nd2	296.739	6751.46	11989.9	1569	7	78.408	1218.93	363	3880	7898690	420.431	10.6887	0	µm	488		95574.1
A 009.nd2	296.739	6751.46	11989.9	1569	8	60.1128	1114.42	477	3631	5536435	393.53	7.39511	0	µm	488		66990.9
A 009.nd2	296.739	6751.46	11989.9	1569	9	96.9694	1008.53	280	2577	8082323	368.913	8.02804	0	µm	488		97796.1
A 008.nd2	280.594	6753.2	11933.1	1365.7	1	141.28	684.493	311	3663	7992140	243.619	11.2708	0	µm	488		96704.9
A 008.nd2	280.594	6753.2	11933.1	1365.7	2	75.7944	725.393	312	2416	4543864	230.991	7.74359	0	µm	488		54980.8
A 008.nd2	280.594	6753.2	11933.1	1365.7	3	45.9558	862.266	305	1718	3274885	209.835	5.63279	0	µm	488		39626.1
A 008.nd2	280.594	6753.2	11933.1	1365.7	4	133.935	808.87	325	2308	8953383	237.753	6.68985	0	µm	488		108336
A 008.nd2	280.594	6753.2	11933.1	1365.7	5	104.314	965.495	394	2802	8323533	308.531	6.57747	0	µm	488		100715
A 007.nd2	301.262	6753.2	12020.4	1302	1	78.9525	1110.31	447	3536	7244752	364.343	6.72931	0	µm	488		87661.5
A 007.nd2	301.262	6753.2	12020.4	1302	2	157.881	1015.64	240	3335	13252085	348.193	11.6471	0	µm	488		160350
A 007.nd2	301.262	6753.2	12020.4	1302	3	75.4919	899.416	329	3213	5611456	304.794	9.76596	0	µm	488		67898.6
A 007.nd2	301.262	6753.2	12020.4	1302	4	31.2059	1129.69	471	3085	2913464	362.856	6.54989	0	µm	488		35252.9
A 007.nd2	301.262	6753.2	12020.4	1302	5	165.746	814.942	192	3927	11163069	319.002	15.6634	0	µm	488		135073
A 007.nd2	301.262	6753.2	12020.4	1302	6	40.7165	874.766	352	2290	2943587	319.438	6.50568	0	µm	488		35617.4
a 006.nd2	2830.64	6778.69	-6602.9	1727.4	1	134.564	1067.2	184	3801	11868280	344.317	16.5261	0	µm	488		143606
a 006.nd2	2830.64	6778.69	-6602.9	1727.4	2	44.4433	888.091	393	2925	3261960	305.01	7.44275	0	µm	488		39469.7
a 006.nd2	2830.64	6778.69	-6602.9	1727.4	3	83.5142	766.396	274	2983	5289664	295.1	10.8869	0	µm	488		64004.9
a 006.nd2	2830.64	6778.69	-6602.9	1727.4	4	75.3951	707.396	276	2118	4407783	198.251	7.67391	0	µm	488		53334.2
a 006.nd2	2830.64	6778.69	-6602.9	1727.4	5	62.0246	996.437	417	2524	5107734	258.938	6.05276	0	µm	488		61803.6
a 006.nd2	2830.64	6778.69	-6602.9	1727.4	6	35.1868	838.802	171	2647	2439236	291.942	15.4795	0	µm	488		29514.8
a 005.nd2	1862.24	6777.47	-7359.9	5454.5	1	136.077	778.918	278	3158	8759710	255.768	7.2069	0	µm	488		105992
a 005.nd2	1862.24	6777.47	-7359.9	5454.5	2	55.2486	663.562	202	2481	3029822	235.902	11.3288	0	µm	488		36660.8
a 005.nd2	1862.24	6777.47	-7359.9	5454.5	3	37.1591	884.125	254	2722	2715149	350.882	10.7165	0	µm	488		32853.3
a 005.nd2	1862.24	6777.47	-7359.9	5454.5	4	40.9222	703.004	263	1490	2377559	207.199	5.6654	0	µm	488		28768.5
a 005.nd2	1862.24	6777.47	-7359.9	5454.5	5	68.849	485.275	245	1520	2761213	169.634	6.17886	0	µm	488		33410.7
a 004.nd2	1868.1	6771.61	-7769.4	5344.5	1	84.0829	525.07	145	1526	3648714	203.247	9.71974	0	µm	488		44149.4
a 004.nd2	4030.04	6771.61	-7777.3	5598	1	64.8681	801.011	274	2136	4294221	306.931	7.13139	0	µm	488		51960.1
a 004.nd2	4030.04	6771.61	-7777.3	5598	2	38.3933	652.278	262	2076	2069677	188.863	7.92366	0	µm	488		25043.1
a 004.nd2	4030.04	6771.61	-7777.3	5598	3	17.8112	800.861	364	2206	1178867	252.866	6.06044	0	µm	488		14264.3
a 004.nd2	4030.04	6771.61	-7777.3	5598	4	23.1715	841.289	248	2175	1611068	287.006	8.77016	0	µm	488		19493.9
a 004.nd2	4030.04	6771.61	-7777.3	5598	5	114.079	566.232	192	2260	5338438	195.746	10.6823	0	µm	488		64595.1
a 004.nd2	4030.04	6771.61	-7777.3	5598	6	59.532	596.04	262	1774	2932519	198.591	6.77099	0	µm	488		35483.5
a 004.nd2	6222.15	6771.61	-7681.5	5849.5	1	76.8471	714.553	240	1973	4538129	283.409	6.77647	0	µm	488		54911.4
a 004.nd2	6222.15	6771.61	-7681.5	5849.5	2	52.514	907.585	399	2901	3938920	267.528	7.27068	0	µm	488		47660.9
a 004.nd2	6222.15	6771.61	-7681.5	5849.5	3	78.5169	903.898	350	2949	5865394	327.49	8.42571	0	µm	488		70971.3
a 004.nd2	6222.15	6771.61	-7681.5	5849.5	4	47.1779	772.667	267	2011	3012628	251.405	7.53184	0	µm	488		36452.8
a 004.nd2	6222.15	6771.61	-7681.5	5849.5	5	162.176	681.005	224	1846	9127504	207.118	5.57037	0	µm	488		110443
a 004.nd2	6222.15	6771.61	-7681.5	5849.5	6	51.788	920.558	376	2260	3939989	365.169	6.01064	0	µm	488		47673.9
a 005.nd2	6163.21	6777.47	-6652.5	4842.8	1	119.088	1066.1	267	3074	10492566	386.715	10.2126	0	µm	488		126960
a 005.nd2	6163.21	6777.47	-6652.5	4842.8	2	43.1002	1085.33	298	3642	3865940	391.928	12.2215	0	µm	488		46777.9
a 005.nd2	6163.21	6777.47	-6652.5	4842.8	3	75.5282	713.28	251	2750	4452294	249.832	10.9562	0	µm	488		53872.8
a 005.nd2	6163.21	6777.47	-6652.5	4842.8	4	103.116	909.681	268	4095	7752301	395.956	14.5213	0	µm	488		93802.8
a 005.nd2	6163.21	6777.47	-6652.5	4842.8	5	131.067	855.052	228	2988	9261927	256.17	9.36131	0	µm	488		112069
a 005.nd2	6163.21	6777.47	-6652.5	4842.8	6	42.7977	962.229	295	2324	3403403	338.922	7.87797	0	µm	488		41181.2
a 005.nd2	4046.35	6777.47	-7023.4	5090	1	49.5132	797.906	326	2304	3265033	239.508	7.06748	0	µm	488		39506.9
a 005.nd2	4046.35	6777.47	-7023.4	5090	2	43.1002	788.887	339	1969	2810016	239.912	5.80826	0	µm	488		34001.2
a 005.nd2	4046.35	6777.47	-7023.4	5090	3	131.454	1246.05	315	3113	13537120	472.933	9.10234	0	µm	488		163799
a 005.nd2	4046.35	6777.47	-7023.4	5090	4	75.6129	914.453	304	3581	5714414	335.505	11.7796	0	µm	488		69144.4
a 006.nd2	22037.8	6777.58	-7274.3	4867.2	1	89.8788	1284.65	345	3144	9542389	432.145	8.59016	0	µm	488		115463
a 006.nd2	22037.8	6777.58	-7274.3	4867.2	2	69.4298	1139.72	351	3131	6539687	403.077	8.92023	0	µm	488		79130.2
a 006.nd2	22037.8	6777.58	-7274.3	4867.2	3	75.0805	1374.26	277	4095	8527290	405.183	14.7834	0	µm	488		103180
a 006.nd2	22037.8	6777.58	-7274.3	4867.2	4	70.7366	1105.94	250	4095	6465312	567.988	16.38	0	µm	488		78230.3
a 006.nd2	22037.8	6777.58	-7274.3	4867.2	5	126.191	1009.02	406	3568	10523051	329.237	8.45498	0	µm	488		127329
a 006.nd2	22037.8	6777.58	-7274.3	4867.2	6	88.6688	816.561	379	2283	5983758	227.501	6.02375	0	µm	488		72403.5
a 006.nd2	22037.8	6777.58	-7274.3	4867.2	7	28.3987	792.945	378	2215	1861042	229.752	5.85979	0	µm	488		22518.6
a 006.nd2	22037.8	6777.58	-7274.3	4867.2	8	56.9789	838.066	336	2407	3946452	249.31	7.16369	0	µm	488		47752.1
a 006.nd2	22037.8	6777.58	-7274.3	4867.2	9	29.4393	894.349	290	1829	2175951	228.225	6.3069	0	µm	488		26329
a 006.nd2	22037.8	6777.58	-7274.3	4867.2	10	48.9324	937.67	269	2434	3791936	334.858	9.04833	0	µm	488		45882.4
a 006.nd2	22037.8	6777.58	-7274.3	4867.2	11	91.9963	901.12	374	2532	6851217	334.295	6.34586	0	µm	488		82899.7
a 006.nd2	22037.8	6777.58	-7274.3	4867.2	12	77.3069	1210.34	432	4095	7732870	586.915	9.47917	0	µm	488		93567.7
a 006.nd2	22037.8	6777.58	-7274.3	4867.2	13	48.4121	909.154	356	3433	3637527	282.697	9.64326	0	µm	488		44014.1
a 006.nd2	22037.8	6777.58	-7274.3	4867.2	14	99.5951	974.205	399	3858	8018682	329.834	9.1639	0	µm	488		97026.1
a 006.nd2	22037.8	6777.58	-7274.3	4867.2	15	36.9776	1199.3	425	3473	3665058	496.51	8.17177	0	µm	488		44347.2
a 006.nd2	22037.8	6777.58	-7274.3	4867.2	16	41.4062	1009.77	455	2098	3455446	220.846	4.61099	0	µm	488		41810.9
a 006.nd2	19610	6776.79	-6024.5	3809.3	1	153.368	896.243	320	2939	11359876	295.636	8.16389	0	µm	488		137454
a 006.nd2	19610	6776.79	-6024.5	3809.3	2	59.1085	1043.05	396	4095	5095285	368.743	10.3409	0	µm	488		61652.9
a 006.nd2	19610	6776.79	-6024.5	3809.3	3	40.9101	931.032	373	4095	3147818	371.826	10.9786	0	µm	488		38088.6
a 006.nd2	19610	6776.79	-6024.5	3809.3	4	72.0676	879.002	352	3464	5235336	278.074	9.84091	0	µm	488		63347.6
a 006.nd2	19610	6776.79	-6024.5	3809.3	5	56.3255	928.671	260	2433	4322964	239.661	9.35769	0	µm	488		52307.9
a 006.nd2	19610	6776.79	-6024.5	3809.3	6	68.7038	853.305	340	2032	4845063	264.637	5.97647	0	µm	488		58625.3
a 006.nd2	19610	6776.79	-6024.5	3809.3	7	114.914	686.327	186	2301	6518052	221.925	11.3911	0	µm	488		78868.4
a 006.nd2	19610	6776.79	-6024.5	3809.3	8	55.3091	922.327	355	2050	4215955	229.674	5.77465	0	µm	488		51013.1
a 006.nd2	19610	6776.79	-6024.5	3809.3	9	78.3354	848.918	417	2824	5495895	255.487	6.77218	0	µm	488		66500.3
a 006.nd2	17545.2	6776.51	-6228.6	3619.4	1	64.6624	821.261	239	1663	4388820	229.526	6.95816	0	µm	488		53104.7
a 006.nd2	17545.2	6776.51	-6228.6	3619.4	2	97.1267	801.742	311	1753	6435586	231.333	5.14076	0	µm	488		77870.6
a 006.nd2	17545.2	6776.51	-6228.6	3619.4	3	63.3193	1401.17	225	4095	7332332	751.185	18.2	0	µm	488		88721.2
a 006.nd2	17545.2	6776.51	-6228.6	3619.4	4	26.7531	1501.45	541	3351	3319709	406.606	6.19409	0	µm	488		40168.5
a 006.nd2	17545.2	6776.51	-6228.6	3619.4	5	95.6868	843.472	327	3225	6670174	234.218	9.86238	0	µm	488		80709.1
a 006.nd2	17545.2	6776.51	-6228.6	3619.4	6	47.0085	747.531	275	1703	2904157	227.934	6.19273	0	µm	488		35140.3
a 006.nd2	17545.2	6776.51	-6228.6	3619.4	7	82.4373	662.163	184	2173	4511314	261.932	10.7574	0	µm	488		54586.9
a 006.nd2	15392.2	6777.2	-6442.7	3381.9	1	84.458	922.221	187	4095	6437101	446.168	21.8984	0	µm	488		77888.9
a 006.nd2	15392.2	6777.2	-6442.7	3381.9	2	96.7395	733.76	252	1932	5866408	216.887	6.61644	0	µm	488		70983.5
a 006.nd2	15392.2	6777.2	-6442.7	3381.9	3	107.17	698.625	288	4095	6187719	307.578	13.2097	0	µm	488		74871.4
a 006.nd2	15392.2	6777.2	-6442.7	3381.9	4	71.0875	999.41	410	3144	5871531	276.479	7.66829	0	µm	488		71045.5
a 006.nd2	15392.2	6777.2	-6442.7	3381.9	5	76.4478	822.733	283	1757	5198029	215.085	5.82686	0	µm	488		62896.2
a 006.nd2	15392.2	6777.2	-6442.7	3381.9	6	25.9787	1146.16	241	2857	2460803	354.446	11.8548	0	µm	488		29775.7
a 006.nd2	13353.6	6777.1	-6418.1	3117.2	1	163.58	894.202	253	2542	12088723	336.108	8.76552	0	µm	488		146274
a 006.nd2	13353.6	6777.1	-6418.1	3117.2	2	114.018	768.145	280	2522	7238231	223.053	8.43478	0	µm	488		87582.6
a 006.nd2	13353.6	6777.1	-6418.1	3117.2	3	84.7726	709.754	308	1917	4972534	190.21	5.88037	0	µm	488		60167.7
a 006.nd2	13353.6	6777.1	-6418.1	3117.2	4	118.677	695.227	250	1806	6818783	214.371	6.94615	0	µm	488		82507.3
a 006.nd2	13353.6	6777.1	-6418.1	3117.2	5	56.4344	728.719	282	1582	3398744	186.644	5.60993	0	µm	488		41124.8
a 006.nd2	13353.6	6777.1	-6418.1	3117.2	6	78.5169	950.81	348	2901	6169808	291.343	8.33621	0	µm	488		74654.7
a 006.nd2	9195.46	6777.13	-6617	2291	1	63.2104	936.545	293	2622	4892512	301.367	8.74	0	µm	488		59199.4
a 006.nd2	4961.93	6776.68	-6737	1988.5	1	63.9606	690.416	223	1685	3649538	203.473	7.55605	0	µm	488		44159.4
a 006.nd2	4961.93	6776.68	-6737	1988.5	2	60.8146	1067.4	303	3799	5364741	370.635	10.1776	0	µm	488		64913.4
a 006.nd2	4961.93	6776.68	-6737	1988.5	3	65.2069	933.643	311	4095	5031404	554.134	13.1672	0	µm	488		60880
a 006.nd2	4961.93	6776.68	-6737	1988.5	4	32.1981	1012.35	332	2027	2693867	318.265	5.72599	0	µm	488		32595.8
																	68632.4
