# Supplementary material for: Aurora kinase A promotes trained immunity via regulation of endogenous S-adenosylmethionine metabolism
Source: eLife journal article supplement (doi:10.7554/elife.104138), 2025-01-08
Supplement: fig6-data1 [file a4.xlsx]

## Sheet: ROI Statistics
FileName	Time (ms)	Z Pos	X Pos	Y Pos	ROI ID	ROI Area [µm²]	ROI Mean Intensity	ROI Min Intensity	ROI Max Intensity	ROI Sum Intensity	ROI StDev Intensity	ROI Signal/Background	Area Fraction	Unit	Channel
A4 002.nd2	183.244	6773.23	-2122.8	3517.6	1	110.969	760.707	192	1937	6976443	279.768	9.26794	0	µm	488	84415
A4 002.nd2	183.244	6773.23	-2122.8	3517.6	2	62.2061	562.678	173	1790	2892728	218.751	9.27461	0	µm	488	35002
A4 002.nd2	183.244	6773.23	-2122.8	3517.6	3	67.4817	702.524	308	2000	3917974	246.695	6.43087	0	µm	488	47407.5
A4 002.nd2	183.244	6773.23	-2122.8	3517.6	4	61.7705	509.016	240	2189	2598529	201.923	8.61811	0	µm	488	31442.2
A4 002.nd2	183.244	6773.23	-2122.8	3517.6	5	126.094	613.607	187	1837	6394399	213.159	8.54419	0	µm	488	77372.2
A4 002.nd2	183.244	6773.23	-2122.8	3517.6	6	21.8647	732.99	245	1403	1324513	197.109	5.72653	0	µm	488	16026.6
A4 002.nd2	183.244	6773.23	-2122.8	3517.6	7	50.6506	623.149	282	2556	2608503	284.842	9	0	µm	488	31562.9
A4 002.nd2	183.244	6773.23	-2122.8	3517.6	8	73.81	616.854	248	1460	3762809	186.737	5.8871	0	µm	488	45530
A4 003.nd2	2122.77	6773.26	-2242.9	3657	1	130.716	564.468	201	1517	6097952	165.822	6.95872	0	µm	488	73785.2	ok	total low but high in m
A4 003.nd2	2122.77	6773.26	-2242.9	3657	2	166.266	593.583	179	2266	8156419	179.625	11.0537	0	µm	488	98692.7
A4 003.nd2	2122.77	6773.26	-2242.9	3657	3	101.664	840.321	223	2968	7060379	317.024	11.7778	0	µm	488	85430.6
A4 003.nd2	2122.77	6773.26	-2242.9	3657	4	63.9001	654.005	209	1597	3453802	202.561	7.64115	0	µm	488	41791
A4 003.nd2	2122.77	6773.26	-2242.9	3657	5	67.2639	708.05	205	1670	3936052	227.417	8.14634	0	µm	488	47626.2
A4 003.nd2	2122.77	6773.26	-2242.9	3657	6	97.1751	812.174	225	2086	6522571	304.682	9.10917	0	µm	488	78923.1
A4 003.nd2	2122.77	6773.26	-2242.9	3657	7	46.0163	1163.49	317	2486	4424771	399.503	7.84227	0	µm	488	53539.7
A4 003.nd2	2122.77	6773.26	-2242.9	3657	8	48.9324	587.691	231	1997	2376623	239.651	8.64502	0	µm	488	28757.1
A4 003.nd2	2122.77	6773.26	-2242.9	3657	9	32.8515	966.769	319	2052	2624778	304.118	6.4326	0	µm	488	31759.8
A4 003.nd2	4245.32	6773.26	-2069.5	3787.2	1	117.636	917.703	249	2430	8921908	245.985	8.86861	0	µm	488	107955	ok
A4 003.nd2	4245.32	6773.26	-2069.5	3787.2	2	24.3815	458.416	229	1115	923708	123.567	4.869	0	µm	488	11176.9
A4 003.nd2	4245.32	6773.26	-2069.5	3787.2	3	33.2871	563.162	224	1296	1549260	160.617	5.78571	0	µm	488	18746
A4 003.nd2	4245.32	6773.26	-2069.5	3787.2	4	53.119	1036.63	325	2652	4550802	390.597	8.16	0	µm	488	55064.7
A4 003.nd2	4245.32	6773.26	-2069.5	3787.2	5	123.674	951.533	223	4095	9725621	369.669	15.9961	0	µm	488	117680
A4 003.nd2	4245.32	6773.26	-2069.5	3787.2	6	90.266	580.334	232	1614	4329294	200.088	6.56098	0	µm	488	52384.5
A4 003.nd2	4245.32	6773.26	-2069.5	3787.2	7	191.966	853.079	228	4095	13534105	409.926	16.4458	0	µm	488	163763
A4 003.nd2	4245.32	6773.26	-2069.5	3787.2	8	45.3024	1048.98	282	2482	3927372	407.851	8.80142	0	µm	488	47521.2
A4 003.nd2	4245.32	6773.26	-2069.5	3787.2	9	29.9112	816.479	287	2172	2018337	265.111	7.56794	0	µm	488	24421.9
A4 003.nd2	4245.32	6773.26	-2069.5	3787.2	10	118.023	1182.54	281	4095	11534454	462.719	12.2239	0	µm	488	139567
A4 003.nd2	4245.32	6773.26	-2069.5	3787.2	11	58.7939	645.254	238	2248	3135290	234.238	9.44538	0	µm	488	37937
A4 003.nd2	4245.32	6773.26	-2069.5	3787.2	12	103.261	899.129	293	2703	7673170	343.562	8.58095	0	µm	488	92845.4
A4 003.nd2	6363.39	6772.44	-1833.1	3844.8	1	62.9563	654.192	305	1370	3403759	177.239	4.40515	0	µm	488	41185.5
A4 003.nd2	6363.39	6772.44	-1833.1	3844.8	2	99.3652	759.691	265	2352	6238584	267.926	8.4	0	µm	488	75486.9
A4 003.nd2	6363.39	6772.44	-1833.1	3844.8	3	55.0792	546.664	247	2649	2488413	213.873	10.7247	0	µm	488	30109.8
A4 003.nd2	6363.39	6772.44	-1833.1	3844.8	4	135.23	1052.02	281	2535	11757431	255.099	7.34783	0	µm	488	142265
A4 003.nd2	6363.39	6772.44	-1833.1	3844.8	5	30.3952	1101.9	331	2983	2767974	371.885	9.01209	0	µm	488	33492.5
A4 003.nd2	6363.39	6772.44	-1833.1	3844.8	6	34.2551	778.448	248	1665	2203787	264.023	6.71371	0	µm	488	26665.8
A4 003.nd2	6363.39	6772.44	-1833.1	3844.8	7	36.421	814.377	185	2358	2451274	291.015	11.79	0	µm	488	29660.4
A4 003.nd2	6363.39	6772.44	-1833.1	3844.8	8	57.1362	735.902	294	1825	3474928	227.283	6.20748	0	µm	488	42046.6
A4 003.nd2	8374.61	6772.28	-1703.8	4001.5	1	24.7929	1182.17	406	2008	2422260	270.13	4.94581	0	µm	488	29309.3
A4 003.nd2	8374.61	6772.28	-1703.8	4001.5	2	62.315	937.567	362	2932	4828470	285.814	7.51795	0	µm	488	58424.5
A4 003.nd2	8374.61	6772.28	-1703.8	4001.5	3	103.963	859.902	239	1959	7388280	254.465	8.19665	0	µm	488	89398.2
A4 003.nd2	8374.61	6772.28	-1703.8	4001.5	4	25.5915	1237.08	487	2048	2616433	251.117	4.20534	0	µm	488	31658.8
A4 003.nd2	8374.61	6772.28	-1703.8	4001.5	5	40.172	884.881	369	1742	2937805	249.131	4.72087	0	µm	488	35547.4
A4 003.nd2	10486.6	6771.65	-1930.5	4393.8	1	43.681	975.739	370	2253	3522418	292.938	6.08919	0	µm	488	42621.3
A4 003.nd2	10486.6	6771.65	-1930.5	4393.8	2	42.9792	725.858	333	1747	2578247	184.257	5.24625	0	µm	488	31196.8
A4 003.nd2	10486.6	6771.65	-1930.5	4393.8	3	10.6359	632.135	208	1360	555647	243.488	6.53846	0	µm	488	6723.33
A4 003.nd2	10486.6	6771.65	-1930.5	4393.8	4	143.288	1099.28	277	2653	13017624	380.593	7.4441	0	µm	488	157513
A4 003.nd2	10486.6	6771.65	-1930.5	4393.8	5	31.1091	518.586	224	1059	1333284	117.929	4.72768	0	µm	488	16132.7
A4 003.nd2	10486.6	6771.65	-1930.5	4393.8	6	36.3	489.698	252	947	1469095	112.472	3.75794	0	µm	488	17776
A4 003.nd2	10486.6	6771.65	-1930.5	4393.8	7	208.64	761.212	282	2789	13125583	281.451	9.78596	0	µm	488	158820
A4 003.nd2	10486.6	6771.65	-1930.5	4393.8	8	48.3395	816.125	303	1704	3260421	211.61	5.62376	0	µm	488	39451.1
A4 003.nd2	10486.6	6771.65	-1930.5	4393.8	9	42.8945	781.023	308	1897	2768725	248.841	6.15909	0	µm	488	33501.6
A4 003.nd2	10486.6	6771.65	-1930.5	4393.8	10	62.3876	1019.21	219	4095	5255031	616.555	18.6986	0	µm	488	63585.9
A4 003.nd2	10486.6	6771.65	-1930.5	4393.8	11	52.0542	1093.23	368	2177	4703060	289.68	5.91576	0	µm	488	56907
A4 003.nd2	10486.6	6771.65	-1930.5	4393.8	12	59.6893	712.176	265	1691	3513163	226.798	6.38113	0	µm	488	42509.3
A4 003.nd2	10486.6	6771.65	-1930.5	4393.8	13	69.333	757.345	322	2265	4339587	190.823	6.68142	0	µm	488	52509
A4 003.nd2	12690.2	6771.31	-1487.9	4755.4	2	113.147	938.8	365	3029	8778722	234.541	7.28644	0	µm	488	106223
A4 003.nd2	12690.2	6771.31	-1487.9	4755.4	3	68.9337	660.143	255	2283	3760836	256.968	8.55056	0	µm	488	45506.1
A4 003.nd2	12690.2	6771.31	-1487.9	4755.4	4	206.692	996.191	232	2419	17016941	287.208	7.681	0	µm	488	205905
A4 003.nd2	12690.2	6771.31	-1487.9	4755.4	5	96.1829	796.978	302	3541	6335182	321.51	11.4226	0	µm	488	76655.7
A4 003.nd2	12690.2	6771.31	-1487.9	4755.4	6	58.4188	698.094	312	1908	3370400	225.227	5.90712	0	µm	488	40781.8
A4 003.nd2	12690.2	6771.31	-1487.9	4755.4	7	146.253	998.386	279	2813	12067488	334.94	9.40803	0	µm	488	146017
A4 003.nd2	14785.1	6770.82	-1164.4	4986.6	1	60.5	682.385	222	1573	3411924	211.511	6.31727	0	µm	488	41284.3
A4 003.nd2	14785.1	6770.82	-1164.4	4986.6	2	40.6923	603.945	164	1724	2031066	234.403	10.5122	0	µm	488	24575.9
A4 003.nd2	14785.1	6770.82	-1164.4	4986.6	3	44.7942	1053.9	281	4095	3901538	683.989	14.573	0	µm	488	47208.6
A4 003.nd2	14785.1	6770.82	-1164.4	4986.6	4	40.4745	758.892	260	2421	2538493	265.82	9.31154	0	µm	488	30715.8
A4 003.nd2	14785.1	6770.82	-1164.4	4986.6	5	80.3803	980.057	236	2626	6510519	290.918	11.1271	0	µm	488	78777.3
A4 003.nd2	14785.1	6770.82	-1164.4	4986.6	6	45.4718	620.931	240	1348	2333460	195.467	5.61667	0	µm	488	28234.9
A4 003.nd2	17016.7	6770.5	-1248.9	5168.9	1	98.857	620.587	214	1466	5070197	170.358	6.85047	0	µm	488	61349.4
A4 003.nd2	17016.7	6770.5	-1248.9	5168.9	2	51.909	758.383	333	1915	3253462	244.307	5.75075	0	µm	488	39366.9
A4 003.nd2	17016.7	6770.5	-1248.9	5168.9	3	101.132	625.43	254	2388	5227345	231.705	9.22008	0	µm	488	63250.9
A4 003.nd2	17016.7	6770.5	-1248.9	5168.9	4	75.9275	727.649	248	1937	4565997	227.066	7.81048	0	µm	488	55248.6
A4 003.nd2	21294.3	6769.39	-811.5	5406.7	1	110.715	689.976	195	1867	6313277	228.546	9.42929	0	µm	488	76390.7
A4 003.nd2	21294.3	6769.39	-811.5	5406.7	2	107.726	676.78	214	1579	6025370	226.586	7.01778	0	µm	488	72907
A4 003.nd2	21294.3	6769.39	-811.5	5406.7	3	48.1943	769.585	279	1892	3065256	266.168	6.75714	0	µm	488	37089.6
A4 003.nd2	21294.3	6769.39	-811.5	5406.7	4	9.4501	957.449	302	4095	747768	416.896	13.5596	0	µm	488	9047.99
A4 003.nd2	21294.3	6769.39	-811.5	5406.7	5	14.9435	1129.7	391	3367	1395185	552.051	8.61125	0	µm	488	16881.7
A4 003.nd2	21294.3	6769.39	-811.5	5406.7	6	53.3368	534.532	242	1079	2356217	118.685	4.45868	0	µm	488	28510.2
A4 003.nd2	21294.3	6769.39	-811.5	5406.7	7	47.6135	604.257	201	1343	2377750	180.263	6.68159	0	µm	488	28770.8
A4 003.nd2	21294.3	6769.39	-811.5	5406.7	8	39.4823	895.483	391	1988	2921960	251.644	5.0844	0	µm	488	35355.7
A4 003.nd2	21294.3	6769.39	-811.5	5406.7	9	11.495	621.714	283	1127	590628	141.813	3.98233	0	µm	488	7146.6
A4 003.nd2	21294.3	6769.39	-811.5	5406.7	10	12.4872	845.957	275	3030	873028	328.218	11.0182	0	µm	488	10563.6
A4 003.nd2	21294.3	6769.39	-811.5	5406.7	11	43.6205	616.32	257	1187	2221832	167.088	4.61868	0	µm	488	26884.2
A4 003.nd2	21294.3	6769.39	-811.5	5406.7	12	107.557	916.774	230	3445	8149204	313.488	13	0	µm	488	98605.4
A4 003.nd2	21294.3	6769.39	-811.5	5406.7	13	17.2062	793.203	315	1492	1127935	233.297	4.73651	0	µm	488	13648
A4 003.nd2	21294.3	6769.39	-811.5	5406.7	14	40.9948	773.958	340	1705	2622170	199.437	5.01471	0	µm	488	31728.3
A4 003.nd2	21294.3	6769.39	-811.5	5406.7	15	151.286	637.213	207	2349	7967078	197.92	10.348	0	µm	488	96401.6
A4 003.nd2	21294.3	6769.39	-811.5	5406.7	16	89.177	663.85	215	1700	4892575	234.812	7.05394	0	µm	488	59200.2
A4 003.nd2	21294.3	6769.39	-811.5	5406.7	17	72.1523	825.556	317	2005	4922789	275.628	6.32492	0	µm	488	59565.7
A4 004.nd2	2161.18	6774.68	-1538.6	5632.7	1	48.4363	1019.02	422	4095	4079130	543.092	9.70379	0	µm	488	49357.5
A4 004.nd2	4715.46	6774.58	-1754.2	4314.6	1	82.3163	859.101	281	2921	5844463	317.246	9.39228	0	µm	488	70718
A4 004.nd2	4715.46	6774.58	-1754.2	4314.6	2	30.0443	760.721	280	1831	1888870	250.705	6.53929	0	µm	488	22855.3
A4 004.nd2	4715.46	6774.58	-1754.2	4314.6	3	46.9117	632.319	288	2964	2451502	276.417	10.2561	0	µm	488	29663.2
A4 004.nd2	6944.22	6778.32	-1487.7	4139	1	38.2481	941.99	424	2002	2977629	250.329	4.7217	0	µm	488	36029.3
A4 004.nd2	6944.22	6778.32	-1487.7	4139	2	49.2228	1054.76	300	4095	4290777	583.79	13.0414	0	µm	488	51918.4
A4 004.nd2	6944.22	6778.32	-1487.7	4139	3	35.8523	844.037	340	1810	2500881	289.918	5.32353	0	µm	488	30260.7
A4 004.nd2	6944.22	6778.32	-1487.7	4139	4	24.9986	634.117	248	3117	1310085	353.43	12.5685	0	µm	488	15852
A4 004.nd2	6944.22	6778.32	-1487.7	4139	5	26.8378	821.581	214	1643	1822266	205.881	7.67757	0	µm	488	22049.4
A4 004.nd2	6944.22	6778.32	-1487.7	4139	6	37.268	982.846	296	2382	3027167	263.225	8.0473	0	µm	488	36628.7
A4 004.nd2	9404.55	6778.35	-160.6	4239.9	1	80.8038	714.742	310	2140	4773045	228.86	6.90323	0	µm	488	57753.8
A4 004.nd2	9404.55	6778.35	-160.6	4239.9	2	57.4145	824.246	193	2312	3911046	477.71	11.6768	0	µm	488	47323.7
A4 004.nd2	9404.55	6778.35	-160.6	4239.9	3	83.6352	867.225	298	2264	5994257	299.703	6.46857	0	µm	488	72530.5
A4 004.nd2	9404.55	6778.35	-160.6	4239.9	4	19.4447	741.275	322	2055	1191229	306.334	6.38199	0	µm	488	14413.9
A4 004.nd2	9404.55	6778.35	-160.6	4239.9	5	114.212	680.594	227	1746	6424125	182.493	5.39847	0	µm	488	77731.9
A4 004.nd2	11505.1	6777.85	128.4	3863.6	1	31.3874	1433.06	365	4095	3717349	709.313	11.2192	0	µm	488	44979.9
A4 004.nd2	11505.1	6777.85	128.4	3863.6	2	91.4155	846.242	294	4095	6393355	431.651	13.2955	0	µm	488	77359.6
A4 004.nd2	11505.1	6777.85	128.4	3863.6	3	62.2787	821.451	239	4095	4228007	423.308	17.1339	0	µm	488	51158.9
A4 004.nd2	11505.1	6777.85	128.4	3863.6	4	51.4855	929.304	322	1992	3954188	243.504	6.18633	0	µm	488	47845.7
A4 004.nd2	11505.1	6777.85	128.4	3863.6	5	35.3562	1042.17	357	2056	3045207	274.108	5.7591	0	µm	488	36847
A4 004.nd2	11505.1	6777.85	128.4	3863.6	6	20.4127	1001.57	463	2812	1689650	345.651	6.07343	0	µm	488	20444.8
A4 004.nd2	11505.1	6777.85	128.4	3863.6	7	41.8418	1012.76	304	4027	3502121	531.36	13.2467	0	µm	488	42375.7
A4 004.nd2	11505.1	6777.85	128.4	3863.6	8	31.823	932.51	273	4095	2452502	639.834	15	0	µm	488	29675.3
A4 004.nd2	13671.3	6777.44	379	4097.5	1	51.8001	880.209	407	1646	3768173	177.282	4.04423	0	µm	488	45594.9
A4 004.nd2	13671.3	6777.44	379	4097.5	2	47.2263	787.708	329	2082	3074424	216.36	6.32827	0	µm	488	37200.5
A4 004.nd2	13671.3	6777.44	379	4097.5	3	121.012	1158.38	462	2435	11584952	323.765	5.11555	0	µm	488	140178
A4 004.nd2	13671.3	6777.44	379	4097.5	4	106.54	964.754	273	4095	8494655	597.861	15	0	µm	488	102785
A4 004.nd2	13671.3	6777.44	379	4097.5	5	57.9832	567.857	187	1317	2721171	217.303	7.04278	0	µm	488	32926.2
A4 004.nd2	13671.3	6777.44	379	4097.5	6	62.9442	610.756	292	1351	3177155	178.596	4.59524	0	µm	488	38443.6
A4 004.nd2	13671.3	6777.44	379	4097.5	7	86.8296	978.749	284	2577	7023506	373.609	8.47887	0	µm	488	84984.4
A4 004.nd2	15771.3	6777.05	512.4	4279.3	1	62.0972	795.46	255	1998	4082299	234.786	6.40385	0	µm	488	49395.8
A4 004.nd2	15771.3	6777.05	512.4	4279.3	2	68.1714	1191.86	320	4095	6714930	534.166	11.9041	0	µm	488	81250.7
A4 004.nd2	15771.3	6777.05	512.4	4279.3	3	25.4705	632.706	255	1134	1331846	145.303	4.44706	0	µm	488	16115.3
A4 004.nd2	15771.3	6777.05	512.4	4279.3	4	45.1693	1230.96	355	2562	4595177	371.122	7.2169	0	µm	488	55601.6
A4 004.nd2	15771.3	6777.05	512.4	4279.3	5	25.6883	959.086	300	3212	2036140	370.65	10.7067	0	µm	488	24637.3
A4 004.nd2	17840.8	6777.04	844.8	4468.4	1	145.248	1285	329	4095	15425115	449.193	12.4468	0	µm	488	186644
A4 004.nd2	17840.8	6777.04	844.8	4468.4	2	64.5898	848.787	280	1936	4530823	256.597	6.06897	0	µm	488	54823
A4 004.nd2	17840.8	6777.04	844.8	4468.4	3	159.817	815.783	348	2329	10774867	216.752	6.3288	0	µm	488	130376
A4 004.nd2	17840.8	6777.04	844.8	4468.4	4	72.8299	645.06	284	1486	3882615	182.258	4.82468	0	µm	488	46979.6
A4 004.nd2	17840.8	6777.04	844.8	4468.4	5	115.398	660.297	220	1528	6297253	235.853	6.88636	0	µm	488	76196.8
A4 004.nd2	17840.8	6777.04	844.8	4468.4	6	43.1002	452.323	224	1434	1611175	105.535	6.40179	0	µm	488	19495.2
A4 004.nd2	17840.8	6777.04	844.8	4468.4	7	95.6747	817.314	206	1915	6462500	253.553	8.9486	0	µm	488	78196.3
A4 004.nd2	17840.8	6777.04	844.8	4468.4	8	46.6213	894.158	349	2886	3445189	338.735	8.26934	0	µm	488	41686.8
A4 004.nd2	17840.8	6777.04	844.8	4468.4	9	38.2844	806.727	404	2623	2552484	212.083	6.49257	0	µm	488	30885.1
A4 004.nd2	17840.8	6777.04	844.8	4468.4	10	41.5393	635.541	293	1279	2181812	184.826	4.36519	0	µm	488	26399.9
A4 004.nd2	17840.8	6777.04	844.8	4468.4	11	57.5355	610.214	279	1415	2901566	183.223	4.98239	0	µm	488	35108.9
A4 004.nd2	20056.8	6777.04	1041.2	5031.2	1	113.873	616.678	248	1723	5803554	218.124	6.47744	0	µm	488	70223
A4 004.nd2	20056.8	6777.04	1041.2	5031.2	2	72.0313	774.289	279	3148	4609342	363.223	11.0456	0	µm	488	55773
A4 004.nd2	20056.8	6777.04	1041.2	5031.2	3	42.4952	761.782	174	2457	2675377	322.039	14.1207	0	µm	488	32372.1
A4 004.nd2	20056.8	6777.04	1041.2	5031.2	4	78.2507	776.777	227	3061	5023415	392.217	13.4846	0	µm	488	60783.3
A4 004.nd2	20056.8	6777.04	1041.2	5031.2	5	110.57	606.248	257	2186	5539890	180.809	8.18727	0	µm	488	67032.7
A4 004.nd2	20056.8	6777.04	1041.2	5031.2	6	79.8963	656.016	296	4095	4331673	283.015	13.0414	0	µm	488	52413.2
A4 004.nd2	22230.9	6777.26	515.7	4649.5	1	71.8498	661.272	237	1610	3926633	229.783	6.36364	0	µm	488	47512.3
A4 004.nd2	22230.9	6777.26	515.7	4649.5	2	144.038	923.104	221	2558	10988635	364.376	10.3145	0	µm	488	132962
A4 004.nd2	22230.9	6777.26	515.7	4649.5	3	119.996	725.993	270	3435	7199674	301.103	11.5657	0	µm	488	87116.1
A4 004.nd2	22230.9	6777.26	515.7	4649.5	4	90.7258	978.435	282	4095	7336306	428.111	12.9589	0	µm	488	88769.3
A4 004.nd2	22230.9	6777.26	515.7	4649.5	5	141.643	1293.46	255	3788	15141204	462.862	13.6751	0	µm	488	183209
A4 004.nd2	22230.9	6777.26	515.7	4649.5	6	113.062	689.165	253	2233	6439554	264.664	8.5229	0	µm	488	77918.6
A4 004.nd2	22230.9	6777.26	515.7	4649.5	7	77.9724	776.096	243	2000	5001164	268.361	8.23045	0	µm	488	60514.1
A4 004.nd2	22230.9	6777.26	515.7	4649.5	8	99.6919	646.066	237	1751	5322938	211.091	7.2616	0	µm	488	64407.5
A4 005.nd2	262.95	7234.79	13732.9	3797.5	1	95.8925	1066.72	297	3088	8453772	446.976	9.61994	0	µm	488	102291
A4 005.nd2	262.95	7234.79	13732.9	3797.5	2	32.9362	793.344	351	1935	2159483	289.273	5.51282	0	µm	488	26129.7
A4 005.nd2	262.95	7234.79	13732.9	3797.5	3	69.7565	894.912	276	2669	5159165	309.326	9.67029	0	µm	488	62425.9
A4 005.nd2	262.95	7234.79	13732.9	3797.5	4	96.3039	867.775	213	2217	6906620	299.993	10.4085	0	µm	488	83570.1
A4 005.nd2	262.95	7234.79	13732.9	3797.5	5	47.9039	944.812	362	1990	3740510	332.349	5.49724	0	µm	488	45260.2
A4 005.nd2	262.95	7234.79	13732.9	3797.5	6	62.0972	633.98	315	1432	3253585	154.24	4.54603	0	µm	488	39368.4
A4 005.nd2	262.95	7234.79	13732.9	3797.5	7	41.6119	590.869	311	1324	2031999	158.325	4.25723	0	µm	488	24587.2
A4 005.nd2	262.95	7234.79	13732.9	3797.5	8	124.255	1035.18	252	4095	10630264	465.315	15.6897	0	µm	488	128626
A4 006.nd2	266.293	7233.94	14116.5	3643	1	41.1037	1593.18	421	4095	5412027	781.708	9.72684	0	µm	488	65485.5
A4 007.nd2	283.093	7234.48	13103.7	3528.8	1	59.7256	1090.51	361	3238	5382776	316.868	8.77507	0	µm	488	65131.6
A4 007.nd2	283.093	7234.48	13103.7	3528.8	2	43.9109	1948.72	567	3956	7071910	597.335	6.97707	0	µm	488	85570.1
A4 007.nd2	283.093	7234.48	13103.7	3528.8	3	90.9799	1402.13	401	2890	10542580	429.381	6.61327	0	µm	488	127565
A4 008.nd2	270.04	7243.64	12950.7	2799.4	1	168.105	909.573	277	2434	12636700	283.981	8.787	0	µm	488	152904
A4 008.nd2	270.04	7243.64	12950.7	2799.4	2	106.831	1073.54	274	2861	9478278	411.3	10.4416	0	µm	488	114687
A4 008.nd2	270.04	7243.64	12950.7	2799.4	3	17.7749	1739.34	301	3390	2555086	643.782	11.2625	0	µm	488	30916.5
A4 008.nd2	270.04	7243.64	12950.7	2799.4	4	23.9943	1190.32	382	2500	2360402	353.538	6.5445	0	µm	488	28560.9
A4 009.nd2	265.091	7241.09	12659	2913.1	1	92.6255	710.047	286	3866	5435407	207.979	13.2397	0	µm	488	65768.4
A4 009.nd2	265.091	7241.09	12659	2913.1	2	48.2185	1111.81	361	3265	4430563	353.396	9.04432	0	µm	488	53609.8
A4 009.nd2	265.091	7241.09	12659	2913.1	3	74.8869	817.479	268	1955	5059379	276.788	7.29478	0	µm	488	61218.5
A4 009.nd2	265.091	7241.09	12659	2913.1	4	66.8888	747.213	258	2350	4130591	303.926	8.30389	0	µm	488	49980.2
A4 009.nd2	265.091	7241.09	12659	2913.1	5	33.5412	1020.94	372	2807	2830039	415.261	7.5457	0	µm	488	34243.5
A4 010.nd2	265.118	7238.54	12345.5	3119.5	1	42.8219	1201.16	353	3048	4250907	350.436	8.63456	0	µm	488	51436
A4 010.nd2	265.118	7238.54	12345.5	3119.5	2	81.0095	942.816	355	2512	6312155	299.13	7.07606	0	µm	488	76377.1
A4 010.nd2	265.118	7238.54	12345.5	3119.5	3	35.574	942.43	418	2338	2770745	294.598	5.5933	0	µm	488	33526
A4 010.nd2	265.118	7238.54	12345.5	3119.5	4	35.7797	1155.66	431	2503	3417295	372.557	5.80743	0	µm	488	41349.3
A4 010.nd2	265.118	7238.54	12345.5	3119.5	5	95.4327	1126.63	415	2589	8885751	315.219	5.29448	0	µm	488	107518
A4 010.nd2	265.118	7238.54	12345.5	3119.5	6	45.8832	823.084	343	2277	3121133	315.386	6.63848	0	µm	488	37765.7
A4 010.nd2	265.118	7238.54	12345.5	3119.5	7	36.4815	773.379	288	2119	2331738	267.002	7.35764	0	µm	488	28214
A4 010.nd2	265.118	7238.54	12345.5	3119.5	8	98.9417	929.761	280	2477	7602659	315.172	8.84643	0	µm	488	91992.2
A4 010.nd2	265.118	7238.54	12345.5	3119.5	9	62.7264	1243.16	387	2638	6444539	367.741	6.81654	0	µm	488	77978.9
A4 010.nd2	265.118	7238.54	12345.5	3119.5	10	31.9924	1427.9	343	4095	3775355	651.233	11.9388	0	µm	488	45681.8
A4 010.nd2	265.118	7238.54	12345.5	3119.5	11	29.2699	1399.74	526	2699	3385983	359.75	5.13118	0	µm	488	40970.4
A4 010.nd2	265.118	7238.54	12345.5	3119.5	12	26.0392	1495.4	479	3378	3218096	450.396	7.05219	0	µm	488	38939
A4 011.nd2	272.51	7239.61	12024.8	3077.9	1	45.2298	1243.75	362	2448	4649137	303.381	6.76243	0	µm	488	56254.6
A4 011.nd2	272.51	7239.61	12024.8	3077.9	2	90.2902	984.671	302	2756	7347618	341.836	8.77707	0	µm	488	88906.2
A4 011.nd2	272.51	7239.61	12024.8	3077.9	3	41.382	872.356	327	2024	2983459	280.563	6.1896	0	µm	488	36099.9
A4 011.nd2	272.51	7239.61	12024.8	3077.9	4	37.9819	760.061	309	1658	2385831	203.255	5.3657	0	µm	488	28868.6
A4 011.nd2	272.51	7239.61	12024.8	3077.9	5	42.5073	901.94	298	2305	3168516	290.621	7.7349	0	µm	488	38339
A4 011.nd2	272.51	7239.61	12024.8	3077.9	6	126.687	786.082	321	2344	8230278	223.455	5.84136	0	µm	488	99586.4
A4 011.nd2	272.51	7239.61	12024.8	3077.9	7	89.8909	931.111	375	2634	6917227	293.602	6.5037	0	µm	488	83698.4
A4 011.nd2	272.51	7239.61	12024.8	3077.9	8	64.0574	983.709	397	2506	5207758	315.482	6.31234	0	µm	488	63013.9
A4 012.nd2	266.054	7239.61	11949.3	2969.9	1	63.1136	935.34	328	2283	4878732	321.439	6.57925	0	µm	488	59032.7
A4 012.nd2	266.054	7239.61	11949.3	2969.9	2	115.688	980.342	333	3414	9373049	332.863	10.2523	0	µm	488	113414
A4 012.nd2	266.054	7239.61	11949.3	2969.9	3	59.6046	884.83	335	1687	4358672	224.082	5.03582	0	µm	488	52739.9
A4 012.nd2	266.054	7239.61	11949.3	2969.9	4	27.5275	867.797	366	2812	1974238	321.266	7.68306	0	µm	488	23888.3
A4 012.nd2	266.054	7239.61	11949.3	2969.9	5	91.9237	1051.27	370	2514	7986479	288.075	6.13171	0	µm	488	96636.4
A4 013.nd2	271.108	7234.69	11870.2	3307.1	1	79.7269	1266.65	359	3123	8345957	431.126	8.69916	0	µm	488	100986
A4 013.nd2	271.108	7234.69	11870.2	3307.1	2	66.4532	916.134	352	2254	5031409	302.93	6.38527	0	µm	488	60880
A4 013.nd2	271.108	7234.69	11870.2	3307.1	3	53.2037	1154.06	401	3023	5074395	396.702	7.2494	0	µm	488	61400.2
A4 014.nd2	270.819	7235.15	11567	3411.3	1	48.2911	1435.33	543	3502	5728386	377.797	6.44935	0	µm	488	69313.5
A4 014.nd2	270.819	7235.15	11567	3411.3	2	45.9195	1466.63	429	4095	5565878	494.434	9.54546	0	µm	488	67347.1
A4 014.nd2	270.819	7235.15	11567	3411.3	3	32.4885	1147	403	3491	3079699	494.609	8.66253	0	µm	488	37264.4
A4 014.nd2	270.819	7235.15	11567	3411.3	4	122.319	1000.82	322	2552	10117338	324.007	7.92547	0	µm	488	122420
																59427.1
