# Supplementary material for: Aurora kinase A promotes trained immunity via regulation of endogenous S-adenosylmethionine metabolism
Source: eLife journal article supplement (doi:10.7554/elife.104138), 2025-01-08
Supplement: fig6-data1 [file B1.xlsx]

## Sheet: ROI Statistics
FileName	Time (ms)	Z Pos	X Pos	Y Pos	ROI ID	ROI Area [µm²]	ROI Mean Intensity	ROI Min Intensity	ROI Max Intensity	ROI Sum Intensity	ROI StDev Intensity	ROI Signal/Background	Area Fraction	Unit	Channel
B1 006.nd2	258.097	6757.16	9388.7	1633.3	1	53.8813	722.942	300	1708	3219261	203.501	5.47436	0	µm	488		38953.1
B1 006.nd2	258.097	6757.16	9388.7	1633.3	2	67.2397	626.342	340	1624	3480585	165.569	4.53631	0	µm	488		42115.1
B1 006.nd2	258.097	6757.16	9388.7	1633.3	3	72.8178	785.759	350	1582	4728698	216.461	4.21867	0	µm	488		57217.2
B1 006.nd2	258.097	6757.16	9388.7	1633.3	4	54.8251	938.447	409	4095	4252105	312.848	9.43548	0	µm	488		51450.5
B1 006.nd2	258.097	6757.16	9388.7	1633.3	5	23.0626	968.725	428	1972	1846390	292.31	4.60748	0	µm	488		22341.3
B1 006.nd2	258.097	6757.16	9388.7	1633.3	6	50.7474	926.398	387	2054	3885314	291.259	5.30749	0	µm	488		47012.3
B1 006.nd2	258.097	6757.16	9388.7	1633.3	7	29.6329	790.95	384	1860	1937037	227.001	4.84375	0	µm	488		23438.1
B1 006.nd2	258.097	6757.16	9388.7	1633.3	8	42.229	887.874	397	1931	3098681	277.142	4.86398	0	µm	488		37494
B1 007.nd2	266.871	6757.52	9169.8	1943.6	1	69.3209	706.615	284	1602	4048200	231.379	5.54325	0	µm	488		48983.2
B1 007.nd2	266.871	6757.52	9169.8	1943.6	2	41.8176	800.193	396	1566	2765467	198.145	3.95454	0	µm	488		33462.2
B1 007.nd2	266.871	6757.52	9169.8	1943.6	3	73.2776	1045.07	432	4095	6328950	281.79	9.28571	0	µm	488		76580.3
B1 007.nd2	266.871	6757.52	9169.8	1943.6	4	57.9227	720.971	313	1741	3451287	206.862	5.5623	0	µm	488		41760.6
B1 007.nd2	266.871	6757.52	9169.8	1943.6	5	50.0093	716.23	323	1781	2960179	190.905	5.51393	0	µm	488		35818.2
B1 007.nd2	266.871	6757.52	9169.8	1943.6	6	57.3661	765.456	395	1758	3629029	183.318	4.45063	0	µm	488		43911.3
B1 007.nd2	266.871	6757.52	9169.8	1943.6	7	60.4395	506.219	222	1666	2528562	176.822	7.08936	0	µm	488		30595.6
B1 007.nd2	266.871	6757.52	9169.8	1943.6	8	35.5377	860.432	391	1927	2527088	242.908	4.92839	0	µm	488		30577.8
B1 007.nd2	266.871	6757.52	9169.8	1943.6	9	42.8098	651.112	303	1339	2303633	180.876	4.41914	0	µm	488		27874
B1 007.nd2	266.871	6757.52	9169.8	1943.6	10	64.0695	785.849	375	2323	4161068	217.48	6.19467	0	µm	488		50348.9
B1 007.nd2	266.871	6757.52	9169.8	1943.6	11	60.1007	906.144	300	2599	4500817	299.143	7.97239	0	µm	488		54459.9
B1 007.nd2	266.871	6757.52	9169.8	1943.6	12	44.3586	845.007	365	2499	3097795	231.99	6.84657	0	µm	488		37483.3
B1 007.nd2	266.871	6757.52	9169.8	1943.6	13	28.9432	668.77	314	1370	1599698	195.482	4.36306	0	µm	488		19356.3
B1 007.nd2	266.871	6757.52	9169.8	1943.6	14	47.0811	605.225	289	1976	2354929	192.113	6.83737	0	µm	488		28494.6
B1 008.nd2	267.381	6757.04	9084.5	2509.5	1	78.6016	914.608	299	2308	5941292	275.263	7.71906	0	µm	488		71889.6
B1 008.nd2	267.381	6757.04	9084.5	2509.5	2	43.802	738.472	305	1690	2673269	193.113	5.54098	0	µm	488		32346.6
B1 008.nd2	267.381	6757.04	9084.5	2509.5	3	61.1897	660.043	331	1632	3337835	174.882	4.93051	0	µm	488		40387.8
B1 008.nd2	267.381	6757.04	9084.5	2509.5	4	73.2776	787.233	295	1720	4767483	210.566	5.83051	0	µm	488		57686.5
B1 008.nd2	267.381	6757.04	9084.5	2509.5	5	32.0408	600.9	324	1195	1591184	139.789	3.68827	0	µm	488		19253.3
B1 008.nd2	267.381	6757.04	9084.5	2509.5	6	71.4505	773.024	370	1705	4564705	182.436	4.60811	0	µm	488		55232.9
B1 009.nd2	282.737	6759.35	8982.4	2757.8	1	35.3925	728.223	295	2046	2130053	226.982	6.93559	0	µm	488		25773.6
B1 009.nd2	282.737	6759.35	8982.4	2757.8	2	58.1284	865.758	377	2201	4159100	231.135	5.38142	0	µm	488		50325.1
B1 009.nd2	282.737	6759.35	8982.4	2757.8	3	40.0873	902.063	305	1699	2988536	240.117	5.57049	0	µm	488		36161.3
B1 009.nd2	282.737	6759.35	8982.4	2757.8	4	34.2309	503.523	285	1154	1424466	111.437	4.04912	0	µm	488		17236
B1 009.nd2	282.737	6759.35	8982.4	2757.8	5	46.222	853.026	405	2008	3258561	241.362	4.95803	0	µm	488		39428.6
B1 009.nd2	282.737	6759.35	8982.4	2757.8	6	45.0846	574.52	287	1231	2140663	134.303	4.2892	0	µm	488		25902
B1 009.nd2	282.737	6759.35	8982.4	2757.8	7	42.7977	619.763	318	1452	2192100	173.626	4.45399	0	µm	488		26524.4
B1 009.nd2	282.737	6759.35	8982.4	2757.8	8	70.2163	804.585	214	2044	4669009	254.112	9.24887	0	µm	488		56495
B1 009.nd2	282.737	6759.35	8982.4	2757.8	9	33.4686	560.842	267	1673	1551289	161.553	6.10584	0	µm	488		18770.6
B1 009.nd2	282.737	6759.35	8982.4	2757.8	10	37.9577	909.162	359	1770	2852041	321.175	4.8895	0	µm	488		34509.7
B1 010.nd2	268.475	6754.71	9043.6	3189.1	1	45.2661	505.105	240	1489	1889597	155.249	6.20417	0	µm	488		22864.1
B1 010.nd2	268.475	6754.71	9043.6	3189.1	2	32.1134	487.699	217	1235	1294354	135.872	5.69124	0	µm	488		15661.7
B1 010.nd2	268.475	6754.71	9043.6	3189.1	3	29.524	616.702	276	1308	1504754	159.721	4.73913	0	µm	488		18207.5
B1 010.nd2	268.475	6754.71	9043.6	3189.1	4	22.4334	867.816	326	2312	1608930	348.276	7.09202	0	µm	488		19468.1
B1 010.nd2	268.475	6754.71	9043.6	3189.1	5	21.5743	647.069	356	1660	1153724	212.147	4.66292	0	µm	488		13960.1
B1 010.nd2	268.475	6754.71	9043.6	3189.1	6	24.8171	878.088	375	2318	1800959	271.126	6.18133	0	µm	488		21791.6
B1 010.nd2	268.475	6754.71	9043.6	3189.1	7	27.6606	879.586	402	2049	2010733	305.148	5.09701	0	µm	488		24329.9
B1 010.nd2	268.475	6754.71	9043.6	3189.1	8	25.1438	685.929	302	1800	1425361	289.314	5.96026	0	µm	488		17246.9
B1 011.nd2	272.399	6754.7	9365.2	3375.8	1	63.9848	580.145	247	2936	3067805	233.83	11.8866	0	µm	488		37120.4
B1 011.nd2	272.399	6754.7	9365.2	3375.8	2	28.4834	747.519	312	1675	1759659	250.577	5.36859	0	µm	488		21291.9
B1 011.nd2	272.399	6754.7	9365.2	3375.8	3	36.421	544.082	280	1096	1637687	130.742	3.91429	0	µm	488		19816
B1 011.nd2	272.399	6754.7	9365.2	3375.8	4	45.617	524.191	250	2188	1976201	221.219	8.752	0	µm	488		23912
B1 011.nd2	272.399	6754.7	9365.2	3375.8	5	88.2937	485.49	243	2063	3542622	190.508	7.85597	0	µm	488		42865.7
B1 011.nd2	272.399	6754.7	9365.2	3375.8	6	50.4449	459.939	205	1639	1917484	155.932	7.73113	0	µm	488		23201.6
B1 011.nd2	272.399	6754.7	9365.2	3375.8	7	65.8361	547.182	233	1655	2977218	208.9	7.103	0	µm	488		36024.3
B1 011.nd2	272.399	6754.7	9365.2	3375.8	8	67.6511	550.273	227	2584	3076575	246.14	11.3833	0	µm	488		37226.6
B1 011.nd2	272.399	6754.7	9365.2	3375.8	9	66.4653	515.07	262	1704	2829280	175.094	6.38202	0	µm	488		34234.3
B1 011.nd2	272.399	6754.7	9365.2	3375.8	10	33.5049	460.295	215	1230	1274558	151.662	5.72093	0	µm	488		15422.2
B1 011.nd2	272.399	6754.7	9365.2	3375.8	11	47.8313	551.55	218	2249	2180279	226.307	10.3165	0	µm	488		26381.4
B1 012.nd2	265.436	6754.7	9447.4	3662.9	1	56.0351	766.486	325	2513	3549597	288.072	7.73231	0	µm	488		42950.1
B1 012.nd2	265.436	6754.7	9447.4	3662.9	2	59.8466	676.398	264	2043	3345466	300.842	7.5948	0	µm	488		40480.1
B1 012.nd2	265.436	6754.7	9447.4	3662.9	3	93.2426	606	293	1988	4669838	201.411	6.78498	0	µm	488		56505
B1 012.nd2	265.436	6754.7	9447.4	3662.9	4	53.7361	631.327	315	1266	2803721	170.99	4.01905	0	µm	488		33925
B1 012.nd2	265.436	6754.7	9447.4	3662.9	5	59.1569	677.28	297	2485	3311221	232.215	8.367	0	µm	488		40065.8
B1 012.nd2	265.436	6754.7	9447.4	3662.9	6	24.5025	641.907	213	1417	1299861	201.885	6.65258	0	µm	488		15728.3
B1 012.nd2	265.436	6754.7	9447.4	3662.9	7	55.0792	633.599	360	1576	2884142	174.612	4.13934	0	µm	488		34898.1
B1 012.nd2	265.436	6754.7	9447.4	3662.9	8	46.7544	586.317	323	1703	2265527	155.595	5.27245	0	µm	488		27412.9
B1 012.nd2	265.436	6754.7	9447.4	3662.9	9	42.4831	595.323	243	1665	2090178	196.382	6.85185	0	µm	488		25291.2
B1 012.nd2	265.436	6754.7	9447.4	3662.9	10	61.6011	635.538	312	2091	3235525	194.873	6.70192	0	µm	488		39149.9
B1 012.nd2	265.436	6754.7	9447.4	3662.9	11	61.9278	784.164	342	2274	4013352	283.617	6.64912	0	µm	488		48561.6
B1 013.nd2	267.935	6754.7	8379.2	2223.9	1	70.6035	501.613	232	1349	2926911	183.607	5.55144	0	µm	488		35415.6
B1 013.nd2	267.935	6754.7	8379.2	2223.9	2	31.0728	445.035	254	1057	1142851	130.672	4.16142	0	µm	488		13828.5
B1 013.nd2	267.935	6754.7	8379.2	2223.9	3	48.9566	690.763	288	2961	2794828	227.983	10.2812	0	µm	488		33817.4
B1 013.nd2	267.935	6754.7	8379.2	2223.9	4	42.4468	883.134	345	2725	3098033	315.804	7.69774	0	µm	488		37486.2
B1 013.nd2	267.935	6754.7	8379.2	2223.9	5	28.7254	464.856	203	2214	1103567	206.931	10.9064	0	µm	488		13353.2
B1 013.nd2	267.935	6754.7	8379.2	2223.9	6	31.9077	574.406	261	2548	1514709	292.922	9.76245	0	µm	488		18328
B1 013.nd2	267.935	6754.7	8379.2	2223.9	7	74.8869	634.694	274	1802	3928123	194.823	6.57664	0	µm	488		47530.3
B1 013.nd2	267.935	6754.7	8379.2	2223.9	8	57.6444	643.406	223	2854	3065184	211.145	12.1966	0	µm	488		37088.7
B1 013.nd2	267.935	6754.7	8379.2	2223.9	9	39.2161	650.159	237	2663	2107164	272.109	11.2363	0	µm	488		25496.7
B1 013.nd2	267.935	6754.7	8379.2	2223.9	10	42.3258	484.992	212	1857	1696503	184.809	8.75943	0	µm	488		20527.7
B1 014.nd2	270.325	6755.92	8615.8	1389.5	1	68.8006	543.868	225	3083	3092435	198.887	13.0636	0	µm	488		37418.5
B1 014.nd2	270.325	6755.92	8615.8	1389.5	2	32.2828	468.15	259	1514	1249024	129.564	5.84556	0	µm	488		15113.2
B1 014.nd2	270.325	6755.92	8615.8	1389.5	3	35.816	543.756	282	1363	1609517	147.371	4.83333	0	µm	488		19475.2
B1 014.nd2	270.325	6755.92	8615.8	1389.5	4	40.9706	719.998	328	2779	2437913	286.323	8.47256	0	µm	488		29498.7
B1 014.nd2	270.325	6755.92	8615.8	1389.5	5	54.4742	553.039	269	2056	2489781	180.176	7.53114	0	µm	488		30126.4
B1 014.nd2	270.325	6755.92	8615.8	1389.5	6	35.3078	438.56	205	1207	1279718	135.355	5.88781	0	µm	488		15484.6
B1 014.nd2	270.325	6755.92	8615.8	1389.5	7	30.6856	453.982	225	1636	1151299	128.108	7.27111	0	µm	488		13930.7
B1 015.nd2	271.514	6757.42	8812.3	1029.8	1	147.293	733.771	300	3112	8932193	216.98	8.11246	0	µm	488		108080
B1 015.nd2	271.514	6757.42	8812.3	1029.8	2	61.7463	606.066	279	2099	3092753	201.216	7.5233	0	µm	488		37422.3
B1 015.nd2	271.514	6757.42	8812.3	1029.8	3	46.4398	670.714	328	1969	2574200	230.515	6.00305	0	µm	488		31147.8
B1 015.nd2	271.514	6757.42	8812.3	1029.8	4	42.108	802.057	267	2800	2791159	398.937	10.4869	0	µm	488		33773
B1 015.nd2	271.514	6757.42	8812.3	1029.8	5	41.6603	467.949	231	1180	1611147	143.446	5.10823	0	µm	488		19494.9
B1 015.nd2	271.514	6757.42	8812.3	1029.8	6	54.5105	773.662	285	4095	3485348	419.459	14.3684	0	µm	488		42172.7
B1 015.nd2	271.514	6757.42	8812.3	1029.8	7	84.3854	514.55	202	3128	3588473	163.923	15.4851	0	µm	488		43420.5
B1 005.nd2	6240.27	6973.49	-763.7	4035.4	1	56.2771	626.294	151	3480	2912892	552.897	22.8947	0	µm	405		35246
B1 005.nd2	6240.27	6973.49	-763.7	4035.4	2	47.2384	723.744	164	3070	2825497	525.159	18.7195	0	µm	405		34188.5
B1 005.nd2	6240.27	6973.49	-763.7	4035.4	3	44.5038	852.951	179	3030	3137153	635.888	16.9274	0	µm	405		37959.6
B1 005.nd2	6240.27	6973.49	-763.7	4035.4	4	36.9171	551.784	159	2062	1683492	366.877	12.9686	0	µm	405		20370.3
B1 005.nd2	6240.27	6973.49	-763.7	4035.4	5	79.2187	777.048	190	2850	5087333	498.688	13.7919	0	µm	405		61556.7
B1 005.nd2	6240.27	6973.49	-763.7	4035.4	6	62.3513	812.1	155	3862	4184749	622.128	24.9161	0	µm	405		50635.5
B1 005.nd2	6240.27	6973.49	-763.7	4035.4	7	53.4941	770.31	155	3515	3405539	620.182	22.6774	0	µm	405		41207
B1 005.nd2	6240.27	6973.49	-763.7	4035.4	8	62.5086	588.582	158	2041	3040614	356.582	12.5988	0	µm	405		36791.4
B1 005.nd2	6240.27	6973.49	-763.7	4035.4	9	39.6517	643.407	151	2594	2108446	491.567	17.1788	0	µm	405		25512.2
B1 005.nd2	6240.27	6973.49	-763.7	4035.4	10	63.9001	477.487	154	3023	2521611	447.881	19.6299	0	µm	405		30511.5
B1 005.nd2	6240.27	6973.49	-763.7	4035.4	11	66.7799	582.705	163	2852	3215950	486.093	16.6784	0	µm	405		38913
B1 005.nd2	6240.27	6973.49	-763.7	4035.4	12	40.4624	419.59	147	1846	1403110	323.64	12.5578	0	µm	405		16977.6
B1 005.nd2	19180.9	6975.78	-827.7	3289.8	1	60.3185	1313.48	512	3961	6547700	465.399	7.73633	0	µm	488		79227.2
B1 005.nd2	21209.1	6979.25	-1047.8	3064.5	1	49.1381	1141.78	492	2496	4636754	334.843	5.07317	0	µm	488		56104.7
B1 005.nd2	21209.1	6979.25	-1047.8	3064.5	2	39.2766	706.58	257	1955	2293559	321.295	7.607	0	µm	488		27752.1
B1 005.nd2	21209.1	6979.25	-1047.8	3064.5	3	63.6823	803.338	386	1792	4227969	202.415	4.60668	0	µm	488		51158.4
B1 005.nd2	21209.1	6979.25	-1047.8	3064.5	4	23.0021	1269.26	598	2460	2412864	361.736	4.11371	0	µm	488		29195.7
B1 005.nd2	21209.1	6979.25	-1047.8	3064.5	5	56.8458	1193.56	533	2644	5607366	375.765	4.71301	0	µm	488		67849.1
B1 005.nd2	21209.1	6979.25	-1047.8	3064.5	6	41.0432	755.598	302	1471	2562989	207.677	4.87086	0	µm	488		31012.2
B1 005.nd2	16772.1	6975.78	-400.6	4147.9	1	58.7697	1032.11	413	2416	5012950	340.868	5.84988	0	µm	488		60656.7
B1 005.nd2	16772.1	6975.78	-400.6	4147.9	2	30.855	1127.29	535	2065	2874592	265.181	3.85981	0	µm	488		34782.6
B1 005.nd2	16772.1	6975.78	-400.6	4147.9	3	37.4132	998.714	472	2551	3088025	344.291	5.40466	0	µm	488		37365.1
B1 005.nd2	16772.1	6975.78	-400.6	4147.9	4	44.9878	1064.39	483	2698	3957387	415.619	5.58592	0	µm	488		47884.4
B1 005.nd2	16772.1	6975.78	-400.6	4147.9	5	53.0343	1064.8	480	2599	4666998	327.173	5.41458	0	µm	488		56470.7
B1 005.nd2	16772.1	6975.78	-400.6	4147.9	6	58.7455	1115.05	526	2750	5413565	354.501	5.11152	0	µm	488		65504.1
B1 005.nd2	16772.1	6975.78	-400.6	4147.9	7	30.008	970.309	419	2125	2406366	323.986	5.0716	0	µm	488		29117
B1 005.nd2	16772.1	6975.78	-400.6	4147.9	8	41.9749	923.811	418	2300	3204699	325.251	5.50239	0	µm	488		38776.9
B1 005.nd2	14707.2	6975.43	-49	4083.3	1	29.9112	899.74	412	3370	2224158	409.988	8.17961	0	µm	488		26912.3
B1 005.nd2	12678	6975.43	176.3	4010.3	1	40.1599	1308.73	542	4095	4343668	516.283	7.55535	0	µm	488		52558.4
B1 005.nd2	10608.5	6975.43	128.3	3863.2	1	88.4147	860.828	326	2880	6290068	284.685	8.15864	0	µm	488		76109.8
B1 005.nd2	10608.5	6975.43	128.3	3863.2	2	57.354	1086.98	455	3890	5152298	396.117	8.54945	0	µm	488		62342.8
B1 005.nd2	8239.13	6973.49	-953.4	4183.8	1	59.6288	1056.44	477	2888	5206126	291.699	6.05451	0	µm	488		62994.1
B1 005.nd2	8239.13	6973.49	-953.4	4183.8	2	66.0297	852.633	307	4095	4652819	320.386	12.1875	0	µm	488		56299.1
B1 005.nd2	8239.13	6973.49	-953.4	4183.8	3	73.0477	856.121	401	2376	5168403	300.981	5.92519	0	µm	488		62537.7
B1 005.nd2	8239.13	6973.49	-953.4	4183.8	4	58.7213	861.736	368	2897	4182007	355.684	7.4473	0	µm	488		50602.3
B1 005.nd2	8239.13	6973.49	-953.4	4183.8	5	61.589	844.114	390	2215	4296539	281.573	5.18622	0	µm	488		51988.1
B1 005.nd2	8239.13	6973.49	-953.4	4183.8	6	41.3578	745.17	381	1691	2546991	210.712	4.43832	0	µm	488		30818.6
B1 005.nd2	8239.13	6973.49	-953.4	4183.8	7	63.0652	1132.89	458	4095	5904610	507.207	8.94105	0	µm	488		71445.8
B1 005.nd2	8239.13	6973.49	-953.4	4183.8	8	69.3451	954.127	393	2405	5468099	342.675	6.11959	0	µm	488		66164
B1 005.nd2	8239.13	6973.49	-953.4	4183.8	9	55.5995	725.953	325	4095	3335753	295.947	12.0796	0	µm	488		40362.6
																	37704.1
