# Supplementary material for: Aurora kinase A promotes trained immunity via regulation of endogenous S-adenosylmethionine metabolism
Source: eLife journal article supplement (doi:10.7554/elife.104138), 2025-01-08
Supplement: fig6-data1 [file b2.xlsx]

## Sheet: ROI Statistics
FileName	Time (ms)	Z Pos	X Pos	Y Pos	ROI ID	ROI Area [µm²]	ROI Mean Intensity	ROI Min Intensity	ROI Max Intensity	ROI Sum Intensity	ROI StDev Intensity	ROI Signal/Background	Area Fraction	Unit	Channel					B	A
b 002.nd2	303.245	6749.81	-11312.1	521.9	1	91.0646	943.905	430	3143	7103830	297.029	7.1758	0	µm	488		85956.3			85956.3	103818
b 002.nd2	303.245	6749.81	-11312.1	521.9	2	51.3766	883.602	378	2859	3751773	302.249	7.56349	0	µm	488		45396.5			45396.5	101854
b 002.nd2	303.245	6749.81	-11312.1	521.9	3	83.2117	946.382	331	2267	6508271	291.596	6.84894	0	µm	488		78750.1			78750.1	102866
b 002.nd2	303.245	6749.81	-11312.1	521.9	4	102.632	1076.77	473	4095	9133185	360.366	8.42593	0	µm	488		110512			110512	160622
b 002.nd2	303.245	6749.81	-11312.1	521.9	5	94.6825	738.53	307	4095	5778999	263.679	13.0831	0	µm	488		69925.9			69925.9	105470
b 002.nd2	303.245	6749.81	-11312.1	521.9	6	69.696	861.498	446	2441	4962230	224.577	5.47309	0	µm	488		60043			60043	53981.5
b 002.nd2	303.245	6749.81	-11312.1	521.9	7	35.332	837.351	382	3297	2445066	265.08	8.63089	0	µm	488		29585.3			29585.3	123699
b 002.nd2	303.245	6749.81	-11312.1	521.9	8	67.4212	1546.99	512	4095	8619804	537.531	7.74102	0	µm	488		104300			104300	44723.6
b 002.nd2	303.245	6749.81	-11312.1	521.9	9	44.9152	890.947	302	2891	3307195	445.616	9.57285	0	µm	488		40017.1			40017.1	125958
b 002.nd2	303.245	6749.81	-11312.1	521.9	10	34.8964	981.094	493	1937	2829475	236.686	3.92901	0	µm	488		34236.6			34236.6	141781
b 002.nd2	303.245	6749.81	-11312.1	521.9	11	78.8557	1019.03	390	3166	6640987	394.4	7.99495	0	µm	488		80355.9			80355.9	60766.1
b 002.nd2	303.245	6749.81	-11312.1	521.9	12	59.0117	987.91	418	2630	4818035	303.078	5.56293	0	µm	488		58298.2			58298.2	372872
b 002.nd2	303.245	6749.81	-11312.1	521.9	13	49.7794	862.675	352	2545	3549046	347.845	7.23011	0	µm	488		42943.5			42943.5	92589.1
b 002.nd2	303.245	6749.81	-11312.1	521.9	14	29.766	936.327	439	1953	2303365	209.772	4.44875	0	µm	488		27870.7			27870.7	232378
b 002.nd2	303.245	6749.81	-11312.1	521.9	15	40.8012	870.049	413	2617	2933806	340.797	6.33656	0	µm	488		35499.1			35499.1	133479
b 003.nd2	306.053	6747.32	-11247.5	722.7	1	112.917	1529.65	519	4095	14274670	533.183	7.89017	0	µm	488		172724			172724	24788.1
b 003.nd2	306.053	6747.32	-11247.5	722.7	2	97.7317	1278.57	464	2775	10327011	359.871	5.2958	0	µm	488		124957			124957	73032.1
b 003.nd2	306.053	6747.32	-11247.5	722.7	3	138.194	1176.11	331	4095	13432396	456.729	12.3716	0	µm	488		162532			162532	74942.1
b 003.nd2	306.053	6747.32	-11247.5	722.7	4	79.9931	1394.98	501	4032	9222245	530.925	8.01591	0	µm	488		111589			111589	71753.6
b 003.nd2	306.053	6747.32	-11247.5	722.7	5	50.6264	1105.18	374	3316	4624063	483.959	8.86631	0	µm	488		55951.2			55951.2	83428.1
b 003.nd2	306.053	6747.32	-11247.5	722.7	6	35.453	880.63	305	2219	2580245	226.956	7.27541	0	µm	488		31221			31221	31511.4
b 003.nd2	306.053	6747.32	-11247.5	722.7	7	71.2327	1279.17	503	3181	7530465	406.586	6.32406	0	µm	488		91118.6			91118.6	51204.4
b 003.nd2	306.053	6747.32	-11247.5	722.7	8	66.2354	925.282	396	2815	5064992	320.442	6.9335	0	µm	488		61286.4			61286.4	40217.9
b 003.nd2	306.053	6747.32	-11247.5	722.7	9	36.6267	1049.17	427	2935	3175831	327.894	6.87354	0	µm	488		38427.6			38427.6	56055.7
b 004.nd2	307.36	6747.58	-10453.3	840.6	1	22.3245	1878.33	306	4095	3465524	713.908	13.3824	0	µm	488		41932.8			41932.8	38492.5
b 004.nd2	307.36	6747.58	-10453.3	840.6	2	37.3406	1141.98	540	2368	3524165	318.281	4.38518	0	µm	488		42642.4			42642.4	41259.7
b 004.nd2	307.36	6747.58	-10453.3	840.6	3	48.7267	1055.35	385	3911	4249913	542.505	10.1584	0	µm	488		51423.9			51423.9	130116
b 004.nd2	307.36	6747.58	-10453.3	840.6	4	44.7579	1375.1	597	2839	5086484	394.663	4.75544	0	µm	488		61546.5			61546.5	179643
b 004.nd2	307.36	6747.58	-10453.3	840.6	5	57.2209	1073.81	427	2415	5078055	311.387	5.65574	0	µm	488		61444.5			61444.5	83127.6
b 004.nd2	307.36	6747.58	-10453.3	840.6	6	83.853	1003.68	360	3669	6955474	281.281	10.1917	0	µm	488		84161.2			84161.2	149623
b 004.nd2	307.36	6747.58	-10453.3	840.6	7	39.0951	1326.21	539	4095	4284989	552.168	7.5974	0	µm	488		51848.4			51848.4	119481
b 004.nd2	307.36	6747.58	-10453.3	840.6	8	28.6286	1364.86	519	4095	3229256	577.653	7.89017	0	µm	488		39074			39074	194093
b 004.nd2	307.36	6747.58	-10453.3	840.6	9	48.9566	1113.61	390	2709	4505678	424.015	6.94615	0	µm	488		54518.7			54518.7	179584
b 004.nd2	307.36	6747.58	-10453.3	840.6	10	27.9994	1189.82	292	2713	2753242	337.113	9.2911	0	µm	488		33314.2			33314.2	89998.4
b 004.nd2	307.36	6747.58	-10453.3	840.6	11	30.5283	1413.85	454	3077	3567136	459.63	6.77753	0	µm	488		43162.3			43162.3	130759
b 004.nd2	307.36	6747.58	-10453.3	840.6	12	26.8983	1432.4	583	4095	3184229	613.091	7.02401	0	µm	488		38529.2			38529.2	60135
b 005.nd2	311.026	6746.7	-9882.9	1120.4	1	143.566	1013.34	361	4095	12023322	373.164	11.3435	0	µm	488		145482			145482	82846.6
b 005.nd2	311.026	6746.7	-9882.9	1120.4	2	35.9854	1028.41	442	2598	3058498	312.388	5.87783	0	µm	488		37007.8			37007.8	92157
b 005.nd2	311.026	6746.7	-9882.9	1120.4	3	69.575	1209.17	488	4079	6952715	440.65	8.35861	0	µm	488		84127.9			84127.9	148902
b 005.nd2	311.026	6746.7	-9882.9	1120.4	4	109.396	1118.77	471	2846	10114784	317.627	5.61341	0	µm	488		122389			122389	101269
b 008.nd2	308.967	6744.9	-8582.3	1198.6	1	103.83	623.047	222	1185	5346363	153.159	5.33784	0	µm	488		64691			64691	162494
b 008.nd2	308.967	6744.9	-8582.3	1198.6	2	127.111	797.98	243	3391	8382784	233.62	8.7037	0	µm	488		101432			101432	48936.5
b 008.nd2	308.967	6744.9	-8582.3	1198.6	3	73.9189	686.086	329	2145	4191301	162.778	6.51976	0	µm	488		50714.7			50714.7	45147.9
b 008.nd2	308.967	6744.9	-8582.3	1198.6	4	52.9496	746.978	326	2062	3268775	232.057	6.32515	0	µm	488		39552.2			39552.2	73602.9
b 008.nd2	308.967	6744.9	-8582.3	1198.6	5	81.4088	715.379	247	2043	4813069	240.428	7.82759	0	µm	488		58238.1			58238.1	65150.2
b 008.nd2	308.967	6744.9	-8582.3	1198.6	6	24.8413	620.672	207	1317	1274240	197.797	6.36232	0	µm	488		15418.3			15418.3	51252.3
b 008.nd2	308.967	6744.9	-8582.3	1198.6	7	26.8741	764.701	215	1445	1698400	211.064	6.72093	0	µm	488		20550.6			20550.6	30148.3
b 008.nd2	308.967	6744.9	-8582.3	1198.6	8	79.7753	746.981	251	4095	4924847	320.04	16.3147	0	µm	488		59590.6			59590.6	31310
b 008.nd2	308.967	6744.9	-8582.3	1198.6	9	126.82	517.142	220	1393	5420164	148.827	4.45089	0	µm	488		65584			65584	46002.9
b 008.nd2	308.967	6744.9	-8582.3	1198.6	10	106.976	721.094	258	2741	6375188	167.949	5.94444	0	µm	488		77139.8			77139.8	52629.4
b 008.nd2	308.967	6744.9	-8582.3	1198.6	11	50.1666	552.859	235	2195	2292154	174.266	8.34601	0	µm	488		27735.1			27735.1	108668
b 008.nd2	308.967	6744.9	-8582.3	1198.6	12	55.0913	750.226	316	2750	3415777	294.452	8.70253	0	µm	488		41330.9			41330.9	31288.2
b 009.nd2	314.538	6745.24	-10004.9	2481.6	1	230.323	1365.95	222	4095	26000776	468.327	18.4459	0	µm	488		314609			314609	68551.9
b 009.nd2	314.538	6745.24	-10004.9	2481.6	2	34.4003	768.931	279	4095	2186070	495.444	14.6774	0	µm	488		26451.4			26451.4	39789
b 009.nd2	314.538	6745.24	-10004.9	2481.6	3	17.5934	695.457	336	4095	1011194	495.625	12.1875	0	µm	488		12235.4			12235.4	86543
b 009.nd2	314.538	6745.24	-10004.9	2481.6	4	195.258	717.166	228	3362	11572902	319.713	12.9807	0	µm	488		140032			140032	51868.3
b 010.nd2	2386.98	6742.18	-7726	4292.5	1	52.7802	1082.46	455	4095	4721690	397.059	9	0	µm	488		57132.4			57132.4	59402.9
b 010.nd2	2386.98	6742.18	-7726	4292.5	2	66.1386	1395.11	452	4095	7625684	704.648	9.05973	0	µm	488		92270.8			92270.8	80193.4
b 010.nd2	2386.98	6742.18	-7726	4292.5	3	58.201	1468.1	582	4095	7061553	471.257	7.03608	0	µm	488		85444.8			85444.8	31392.1
b 010.nd2	2386.98	6742.18	-7726	4292.5	4	35.2715	1684.35	743	4095	4909881	543.668	5.51144	0	µm	488		59409.6			59409.6	78920.6
b 010.nd2	2386.98	6742.18	-7726	4292.5	5	39.809	1506.1	729	3863	4955079	420.379	5.29904	0	µm	488		59956.5			59956.5	90877.4
b 010.nd2	2386.98	6742.18	-7726	4292.5	6	124.328	1128.18	483	2814	11592053	307.594	5.56126	0	µm	488		140264			140264	82576.1
b 010.nd2	2386.98	6742.18	-7726	4292.5	7	27.7574	1378.34	601	3218	3161917	422.45	5.35441	0	µm	488		38259.2			38259.2	60026.7
b 010.nd2	2386.98	6742.18	-7726	4292.5	8	42.6888	1267.17	562	2790	4470567	357.785	4.83452	0	µm	488		54093.9			54093.9	60040.5
b 010.nd2	2386.98	6742.18	-7726	4292.5	9	15.0887	1290.69	745	2441	1609490	283.254	3.27651	0	µm	488		19474.8			19474.8	94711.7
b 010.nd2	2386.98	6742.18	-7726	4292.5	10	51.3524	1458.25	777	4095	6188823	399.948	5.27027	0	µm	488		74884.8			74884.8	34665.1
b 010.nd2	2386.98	6742.18	-7726	4292.5	11	19.0696	1149.6	627	2299	1811763	281.907	3.66667	0	µm	488		21922.3			21922.3	95804.9
b 010.nd2	2386.98	6742.18	-7726	4292.5	12	27.6969	1121.87	493	3003	2567964	380.227	6.09128	0	µm	488		31072.4			31072.4	58795
b 010.nd2	2386.98	6742.18	-7726	4292.5	13	21.4654	1406.51	367	4095	2495147	514.605	11.158	0	µm	488		30191.3			30191.3	61702.5
b 010.nd2	2386.98	6742.18	-7726	4292.5	14	60.2701	1102.22	563	2371	5490178	311.709	4.21137	0	µm	488		66431.2			66431.2	40224.4
b 010.nd2	2386.98	6742.18	-7726	4292.5	15	43.0639	1485.52	580	3318	5286960	486.842	5.72069	0	µm	488		63972.2			63972.2	40329.4
b 010.nd2	2386.98	6742.18	-7726	4292.5	16	92.6739	1210.66	557	4095	9272427	360.197	7.35189	0	µm	488		112196			112196	36684.6
b 010.nd2	2386.98	6742.18	-7726	4292.5	17	51.1588	1572.26	689	4095	6647522	494.591	5.9434	0	µm	488		80435			80435	100604
b 010.nd2	4701.07	6741.17	-6846.7	4072.6	1	64.6987	1022.82	410	2823	5469038	387.256	6.88537	0	µm	488		66175.4			66175.4	67351.6
b 010.nd2	4701.07	6741.17	-6846.7	4072.6	2	82.7035	1358.37	470	3067	9284428	399.814	6.52553	0	µm	488		112342			112342	101734
b 010.nd2	4701.07	6741.17	-6846.7	4072.6	3	57.5113	1495.04	571	3626	7105935	483.615	5.85783	0	µm	488		85981.8			85981.8	72586.4
b 010.nd2	4701.07	6741.17	-6846.7	4072.6	4	56.4707	1248.48	447	2708	5826647	403.652	5.65344	0	µm	488		70502.4			70502.4	74981
b 010.nd2	4701.07	6741.17	-6846.7	4072.6	5	91.113	1379.61	471	3190	10388465	399.211	6.77282	0	µm	488		125700			125700	40223.5
b 010.nd2	4701.07	6741.17	-6846.7	4072.6	6	80.2351	1495.14	319	4009	9914274	523.441	11.931	0	µm	488		119963			119963	85953
b 010.nd2	4701.07	6741.17	-6846.7	4072.6	7	77.1496	1614.65	564	4095	10295009	619.022	7.26064	0	µm	488		124570			124570	118011
b 010.nd2	6800.57	6741.17	-7200	3972.3	1	80.6102	1365.95	512	3947	9099983	425.05	7.70898	0	µm	488		110110			110110	81371.3
b 010.nd2	6800.57	6741.17	-7200	3972.3	2	67.6027	1495.56	417	4080	8355666	526.882	9.62264	0	µm	488		101104			101104	98953.5
b 010.nd2	6800.57	6741.17	-7200	3972.3	3	61.3954	1473.68	442	3969	7477476	530.756	8.97964	0	µm	488		90477.5			90477.5	58722.3
b 010.nd2	6800.57	6741.17	-7200	3972.3	4	33.4686	1194.24	478	2783	3303270	412.946	5.82218	0	µm	488		39969.6			39969.6	169292
b 010.nd2	6800.57	6741.17	-7200	3972.3	5	35.7676	1058.26	485	3217	3128209	359.609	6.63299	0	µm	488		37851.3			37851.3	77018.4
b 010.nd2	6800.57	6741.17	-7200	3972.3	6	30.6735	1007.66	412	2350	2554417	298.073	5.70388	0	µm	488		30908.4			30908.4	53171.4
b 010.nd2	6800.57	6741.17	-7200	3972.3	7	41.8539	1215.26	477	2388	4203581	321.757	5.00629	0	µm	488		50863.3			50863.3	62896
b 010.nd2	6800.57	6741.17	-7200	3972.3	8	38.4659	1131.11	440	3020	3595792	359.214	6.86364	0	µm	488		43509.1			43509.1	77846.2
b 010.nd2	6800.57	6741.17	-7200	3972.3	9	49.6705	919.555	422	1941	3774772	262.039	4.55634	0	µm	488		45674.7			45674.7	144300
b 010.nd2	6800.57	6741.17	-7200	3972.3	10	43.6931	1024.8	502	2303	3700536	293.037	4.58765	0	µm	488		44776.5			44776.5	169327
b 010.nd2	6800.57	6741.17	-7200	3972.3	11	55.6721	1254.02	431	4095	5769753	434.404	9.50116	0	µm	488		69814			69814	60203.1
b 010.nd2	8878.88	6741.17	-7348.8	4008.4	1	24.079	1071.34	375	2646	2131975	315.704	7.056	0	µm	488		25796.9			25796.9	102073
b 010.nd2	8878.88	6741.17	-7348.8	4008.4	2	33.5533	1076.77	520	2445	2985890	306.173	4.70192	0	µm	488		36129.3			36129.3	67380.5
b 010.nd2	8878.88	6741.17	-7348.8	4008.4	3	80.6949	1336.64	273	3829	8914068	398.814	14.0256	0	µm	488		107860			107860	123525
b 010.nd2	8878.88	6741.17	-7348.8	4008.4	4	48.9566	1193.65	544	4095	4829509	378.401	7.52757	0	µm	488		58437.1			58437.1	94546.8
b 010.nd2	8878.88	6741.17	-7348.8	4008.4	5	51.3887	1139.27	427	2821	4838491	316.114	6.60656	0	µm	488		58545.7			58545.7	30842.9
b 010.nd2	8878.88	6741.17	-7348.8	4008.4	6	31.8351	957.207	295	2170	2518411	276.864	7.35593	0	µm	488		30472.8			30472.8	34029.9
b 010.nd2	8878.88	6741.17	-7348.8	4008.4	7	60.1854	902.913	340	2847	4491089	360.483	8.37353	0	µm	488		54342.2			54342.2	105634
b 010.nd2	8878.88	6741.17	-7348.8	4008.4	8	99.9944	1240.59	558	3417	10252244	344.504	5.1362	0	µm	488		124052			124052	74846.7
b 010.nd2	8878.88	6741.17	-7348.8	4008.4	9	50.9652	1190.14	244	3688	5012876	418.582	15.1148	0	µm	488		60655.8			60655.8	84477.6
b 010.nd2	8878.88	6741.17	-7348.8	4008.4	10	48.0733	1661.68	539	4095	6601861	629.097	7.5974	0	µm	488		79882.5			79882.5	93702.1
b 010.nd2	8878.88	6741.17	-7348.8	4008.4	11	25.1196	1290.02	538	3275	2678086	412.1	6.08736	0	µm	488		32404.8			32404.8	30179
b 010.nd2	8878.88	6741.17	-7348.8	4008.4	12	26.4748	1287.61	300	2666	2817292	425.382	8.88667	0	µm	488		34089.2			34089.2	94138
b 010.nd2	11397.7	6741.69	-8748.2	4210.8	1	46.1373	1723.34	659	4095	6571100	577.488	6.21396	0	µm	488		79510.3			79510.3	44088.2
b 010.nd2	11397.7	6741.69	-8748.2	4210.8	2	25.8456	1441.67	364	4095	3079403	614.449	11.25	0	µm	488		37260.8			37260.8	88445.8
b 010.nd2	11397.7	6741.69	-8748.2	4210.8	3	49.3801	1721.91	517	4095	7027116	652.369	7.9207	0	µm	488		85028.1			85028.1	71254.3
b 010.nd2	11397.7	6741.69	-8748.2	4210.8	4	40.8133	1387.31	555	3138	4679385	437.428	5.65405	0	µm	488		56620.6			56620.6	76477.3
b 010.nd2	11397.7	6741.69	-8748.2	4210.8	5	45.9679	2027.82	453	4095	7703684	626.698	8.67585	0	µm	488		93214.6			93214.6	77516.4
b 010.nd2	13514.6	6742.6	-9075.1	3799.1	1	119.754	1340.54	295	3652	13267315	408.811	12.3797	0	µm	488		160535			160535	102356
b 010.nd2	13514.6	6742.6	-9075.1	3799.1	2	71.0512	1298.95	499	3941	7627433	414.576	7.19161	0	µm	488		92291.9			92291.9	62592.7
b 010.nd2	13514.6	6742.6	-9075.1	3799.1	3	122.948	1551.33	560	4095	15763034	566.033	7.02401	0	µm	488		190733			190733	25501.5
b 010.nd2	13514.6	6742.6	-9075.1	3799.1	4	146.47	1253.81	476	4095	15177403	572.984	7.9207	0	µm	488		183647			183647	75448.4
b 010.nd2	13514.6	6742.6	-9075.1	3799.1	5	93.8355	1662.67	537	4095	12893970	637.976	7.09705	0	µm	488		156017			156017	79569.3
b 010.nd2	15561.2	6742.6	-8787.4	3781.8	1	52.0058	2199.11	853	4095	9451760	615.927	4.8007	0	µm	488		114366			114366	39487.1
b 010.nd2	15561.2	6742.6	-8787.4	3781.8	2	126.82	1338.53	493	3228	14029101	359.714	6.54767	0	µm	488		169752			169752	103054
b 010.nd2	15561.2	6742.6	-8787.4	3781.8	3	116.729	1916.16	490	4095	18485243	618.23	8.35714	0	µm	488		223671			223671	35004.8
b 010.nd2	17635.4	6742.6	-8790.5	3597.8	1	35.3804	1162.41	460	3313	3398890	440.561	7.20217	0	µm	488		41126.6			41126.6	51385.6
b 010.nd2	17635.4	6742.6	-8790.5	3597.8	2	130.535	1846.76	609	4095	19922800	522.08	6.72414	0	µm	488		241066			241066	79076.4
b 010.nd2	17635.4	6742.6	-8790.5	3597.8	3	174.748	1409.26	521	4095	20352572	470.834	7.35189	0	µm	488		246266			246266	116565
b 010.nd2	17635.4	6742.6	-8790.5	3597.8	4	114.309	1401.42	581	4095	13239199	420.079	6.7686	0	µm	488		160194			160194	50994.9
b 010.nd2	17635.4	6742.6	-8790.5	3597.8	5	59.0601	2065.96	362	4095	10083968	965.041	11.3122	0	µm	488		122016			122016	32082.2
b 010.nd2	17635.4	6742.6	-8790.5	3597.8	6	55.418	1398.66	501	4095	6405877	465.498	8.17365	0	µm	488		77511.1			77511.1	52146.2
b 010.nd2	19730	6742.6	-9100	3522.2	1	81.3846	1898.48	628	4066	12769208	591.662	6.47452	0	µm	488		154507			154507	59527
b 010.nd2	19730	6742.6	-9100	3522.2	2	90.7984	1547.75	309	4095	11614341	617.321	13.2524	0	µm	488		140534			140534	106269
b 010.nd2	19730	6742.6	-9100	3522.2	3	87.8097	1711.38	491	4095	12419451	610.338	8.34012	0	µm	488		150275			150275	36172.3
b 010.nd2	19730	6742.6	-9100	3522.2	4	88.4268	1699.09	673	4095	12416943	555.52	6.0044	0	µm	488		150245			150245	74884.8
b 010.nd2	21907.2	6742.6	-9247.6	3228	1	197.375	1654.62	542	4095	26990190	615.284	6.825	0	µm	488		326581			326581	64762.1
b 010.nd2	21907.2	6742.6	-9247.6	3228	2	163.604	2085.93	636	4095	28203881	661.205	6.43868	0	µm	488		341267			341267	133440
b 010.nd2	21907.2	6742.6	-9247.6	3228	3	60.5242	1520.03	583	4095	7603186	447.327	7.02401	0	µm	488		91998.6			91998.6	22712
b 010.nd2	24048.4	6742.6	-9449.7	2861.7	1	133.04	3191	590	4095	35085037	890.235	6.40845	0	µm	488		424529			424529	30120.1
b 010.nd2	24048.4	6742.6	-9449.7	2861.7	2	70.9181	1725.3	501	4095	10111976	637.089	8.17365	0	µm	488		122355			122355	50639.9
b 010.nd2	24048.4	6742.6	-9449.7	2861.7	3	83.8772	2109.37	852	4095	14622149	602.095	4.80634	0	µm	488		176928			176928	26654
b 010.nd2	28390.6	6741.69	-10217.2	3375.5	1	37.9335	1422.45	548	4095	4459395	679.923	7.45902	0	µm	488		53958.7			53958.7	137120
b 011.nd2	304.837	6744.78	-10216.7	3378.4	1	41.6845	1412.98	367	4095	4867707	747.399	11.158	0	µm	488		58899.3			58899.3	31266
b 011.nd2	304.837	6744.78	-10216.7	3378.4	2	110.328	1655.2	373	4095	15092083	583.519	10.9786	0	µm	488		182614			182614	91294.4
b 011.nd2	304.837	6744.78	-10216.7	3378.4	3	30.3831	1374.6	591	3951	3451622	434.674	6.68528	0	µm	488		41764.6			41764.6	101141
b 011.nd2	304.837	6744.78	-10216.7	3378.4	4	37.0744	1739.43	502	3691	5329628	461.196	7.35259	0	µm	488		64488.5			64488.5	97879.7
b 012.nd2	306.141	6743.63	-9800	2684	1	148.624	1108.66	434	3745	13617718	312.243	8.55023	0	µm	488		164774			164774	112985
b 012.nd2	306.141	6743.63	-9800	2684	2	122.646	666.723	221	1650	6757900	228.55	6.17117	0	µm	488		81770.6			81770.6	97270.5
b 012.nd2	306.141	6743.63	-9800	2684	3	142.187	850.804	333	3197	9997793	318.294	7.58333	0	µm	488		120973			120973	27677.3
b 012.nd2	306.141	6743.63	-9800	2684	4	94.7672	675.833	182	2278	5293126	287.332	12.5165	0	µm	488		64046.8			64046.8	26431.5
b 012.nd2	306.141	6743.63	-9800	2684	5	132.096	976.752	367	2709	10663201	309.665	7.38147	0	µm	488		129025			129025	115459
																					71887.3
																	88691.1				45660.1
																					62075.8
																					54170.5
																					78599.4
																					55149.1
																					58985.5
																					49473.7
																					53309.7
																					58554
																					37602.4
																					23080.8
																					63722.3
																					43140.1
																					65138.6
																					30408.2
																					105864
																					62665.6
																					67014.7
																					69612.2
																					36711.6
																					94786.6
																					96354.7
																					109555
																					158116
																					145244
																					35576.6
																					62254.6
																					83480.6
																					42648.1
																					46832
																					73337
																					76967.6
																					69203.3
																					99176.8
																					87180.9
																					104224
																					77085.1
																					71473.6
																					49838.6
																					12983.7
																					86984.7
																					85579
																					109886
																					77347.9
																					32979.8
																					132341
																					53301.5
																					45949.6
																					135603
																					260501
																					75219.8
																					89808.9
																					306575
																					97834.3
																					66936
																					82209.3
																					40231.3
																					70139.5
																					93858.9
																					88599.7
																					40555.8
																					100325
																					94313.4
																					52745.1
																					36647.2
																					54218.9
																					98883.1
																					69450.9
																					118905
																					82168.1
																					123017
																					57498.9
																					68709.5
																					159973
																					162859
																					51742
																					66968.1
																					107626
																					68560
																					55829.5
																					53879.3
																					125307
																					156831
																					202062
																					81719.2
																					76510.2
																					195306
																					60724.2
																					73588.4
																					50506.6
																					87192.3
																					99219.1
