# Supplementary material for: Aurora kinase A promotes trained immunity via regulation of endogenous S-adenosylmethionine metabolism
Source: eLife journal article supplement (doi:10.7554/elife.104138), 2025-01-08
Supplement: fig6-data1 [file b3.xlsx]

## Sheet: ROI Statistics
FileName	Time (ms)	Z Pos	X Pos	Y Pos	ROI ID	ROI Area [µm²]	ROI Mean Intensity	ROI Min Intensity	ROI Max Intensity	ROI Sum Intensity	ROI StDev Intensity	ROI Signal/Background	Area Fraction	Unit	Channel
B3 001.nd2	1877.81	6782.97	-9369	4934	1	72.7815	534.96	240	1091	3217787	157.565	4.364	0	µm	488		38935.2
B3 001.nd2	1877.81	6782.97	-9369	4934	2	73.9431	500.083	279	1057	3056006	101.201	3.78853	0	µm	488		36977.7
B3 001.nd2	1877.81	6782.97	-9369	4934	3	89.0681	743.542	152	1596	5473212	216.615	10.5	0	µm	488		66225.9
B3 001.nd2	1877.81	6782.97	-9369	4934	4	121.617	471.373	223	1881	4737771	146.756	8.03846	0	µm	488		57327
B3 001.nd2	1877.81	6782.97	-9369	4934	5	76.3631	520.696	209	1424	3286114	151.45	6.8134	0	µm	488		39762
B3 001.nd2	1877.81	6782.97	-9369	4934	6	92.9401	507.058	229	1955	3894716	137.164	8.17992	0	µm	488		47126.1
B3 001.nd2	1877.81	6782.97	-9369	4934	7	104.762	953.898	190	4095	8258852	410.792	20.475	0	µm	488		99932.1
B3 001.nd2	1877.81	6782.97	-9369	4934	8	112.469	638.234	273	1604	5932385	206.856	5.70819	0	µm	488		71781.9
B3 001.nd2	1877.81	6782.97	-9369	4934	9	95.7715	647.368	287	1557	5123916	175.79	5.42509	0	µm	488		61999.4
B3 001.nd2	1877.81	6782.97	-9369	4934	10	126.469	574.593	247	1458	6005648	184.213	5.58621	0	µm	488		72668.3
B3 001.nd2	1877.81	6782.97	-9369	4934	11	63.4403	505.792	260	1827	2651869	149.057	6.8427	0	µm	488		32087.6
B3 001.nd2	1877.81	6782.97	-9369	4934	12	71.6199	608.019	211	1551	3598865	216.13	7.35071	0	µm	488		43546.3
B3 001.nd2	1877.81	6782.97	-9369	4934	13	83.2964	628.18	177	1604	4324393	230.482	8.62366	0	µm	488		52325.2
B3 001.nd2	1877.81	6782.97	-9369	4934	14	114.139	568.167	174	1617	5359520	184.363	8.4023	0	µm	488		64850.2
B3 001.nd2	1877.81	6782.97	-9369	4934	15	87.3136	510.597	207	1308	3684467	170.5	5.76211	0	µm	488		44582.1
B3 001.nd2	1877.81	6782.97	-9369	4934	16	122.065	658.386	239	3355	6641794	312.698	13.4739	0	µm	488		80365.7
B3 001.nd2	1877.81	6782.97	-9369	4934	17	72.963	600.402	222	3416	3620426	296.595	14.3529	0	µm	488		43807.2
B3 001.nd2	4057.32	6782.76	-9447.3	4688.4	1	48.279	749.74	245	3240	2991462	305.169	12.8063	0	µm	488		36196.7
B3 001.nd2	4057.32	6782.76	-9447.3	4688.4	2	103.6	623.373	185	1791	5337316	225.375	8.73658	0	µm	488		64581.5
B3 001.nd2	4057.32	6782.76	-9447.3	4688.4	3	70.0953	584.899	224	1933	3388322	251.867	8.19068	0	µm	488		40998.7
B3 001.nd2	4057.32	6782.76	-9447.3	4688.4	4	61.9399	698.341	236	1913	3574810	257.858	7.71371	0	µm	488		43255.2
B3 001.nd2	4057.32	6782.76	-9447.3	4688.4	5	66.8646	667.779	273	1728	3690147	243.862	6.28364	0	µm	488		44650.8
B3 001.nd2	4057.32	6782.76	-9447.3	4688.4	6	73.2897	619.426	241	1907	3751866	245.823	7.84774	0	µm	488		45397.6
B3 001.nd2	4057.32	6782.76	-9447.3	4688.4	7	80.2109	457.982	202	1393	3035963	135.316	6.57076	0	µm	488		36735.2
B3 001.nd2	4057.32	6782.76	-9447.3	4688.4	8	73.931	663.727	251	1870	4055370	212.937	7.13741	0	µm	488		49070
B3 001.nd2	4057.32	6782.76	-9447.3	4688.4	9	53.7603	493.567	205	1413	2192919	165.021	6.42273	0	µm	488		26534.3
B3 001.nd2	4057.32	6782.76	-9447.3	4688.4	10	80.7191	677.836	240	4095	4521842	285.463	17.0625	0	µm	488		54714.3
B3 001.nd2	4057.32	6782.76	-9447.3	4688.4	11	48.1338	589.027	193	2117	2343151	297.188	10.9689	0	µm	488		28352.1
B3 001.nd2	6182.56	6782.36	-8904.3	4505.5	1	72.3943	818.949	264	2412	4899769	299.124	8.26027	0	µm	488		59287.2
B3 001.nd2	6182.56	6782.36	-8904.3	4505.5	2	45.6775	666.627	277	1522	2516518	198.754	5.21233	0	µm	488		30449.9
B3 001.nd2	6182.56	6782.36	-8904.3	4505.5	3	44.6974	598.982	253	1464	2212639	204.48	5.78656	0	µm	488		26772.9
B3 001.nd2	6182.56	6782.36	-8904.3	4505.5	4	113.51	692.361	233	3353	6495036	302.74	14.3906	0	µm	488		78589.9
B3 001.nd2	6182.56	6782.36	-8904.3	4505.5	5	98.7239	699.775	298	2139	5709465	219.205	6.85577	0	µm	488		69084.5
B3 001.nd2	8304.73	6781.9	-9040.1	4298.2	1	58.2857	497.096	230	1207	2394513	170.816	4.80877	0	µm	488		28973.6
B3 001.nd2	8304.73	6781.9	-9040.1	4298.2	2	21.5743	604.588	307	1239	1077980	159.502	4.03583	0	µm	488		13043.6
B3 001.nd2	8304.73	6781.9	-9040.1	4298.2	3	53.5667	737.593	326	1639	3265322	242.194	4.94479	0	µm	488		39510.4
B3 001.nd2	8304.73	6781.9	-9040.1	4298.2	4	66.8041	661.474	322	1839	3651999	189.143	5.34593	0	µm	488		44189.2
B3 001.nd2	8304.73	6781.9	-9040.1	4298.2	5	107.025	538.882	232	1432	4766412	182.159	5.94191	0	µm	488		57673.6
B3 001.nd2	8304.73	6781.9	-9040.1	4298.2	6	39.1435	452.137	238	914	1462663	104.358	3.84034	0	µm	488		17698.2
B3 001.nd2	8304.73	6781.9	-9040.1	4298.2	7	45.7743	707.313	272	2376	2675765	295.676	8.05424	0	µm	488		32376.8
B3 001.nd2	8304.73	6781.9	-9040.1	4298.2	8	59.2053	692.866	234	1634	3390193	207.348	6.98291	0	µm	488		41021.3
B3 001.nd2	8304.73	6781.9	-9040.1	4298.2	9	78.4443	703.793	283	3305	4562691	257.856	11.6784	0	µm	488		55208.6
B3 001.nd2	8304.73	6781.9	-9040.1	4298.2	10	67.6995	784.177	339	2120	4387469	269.561	6.25369	0	µm	488		53088.4
B3 001.nd2	10322.4	6777.3	-9236.6	4148.7	1	50.82	471.984	194	1253	1982331	148.63	6.45876	0	µm	488		23986.2
B3 001.nd2	10322.4	6777.3	-9236.6	4148.7	2	46.9601	479.411	232	2172	1860594	190.337	8.72289	0	µm	488		22513.2
B3 001.nd2	10322.4	6777.3	-9236.6	4148.7	3	40.9948	400.348	186	2028	1356380	161.901	10.9032	0	µm	488		16412.2
B3 001.nd2	10322.4	6777.3	-9236.6	4148.7	4	55.781	598.679	215	2102	2759908	259.519	9.77674	0	µm	488		33394.9
B3 001.nd2	10322.4	6777.3	-9236.6	4148.7	5	25.1317	548.954	199	1466	1140177	229.555	7.36683	0	µm	488		13796.1
B3 001.nd2	10322.4	6777.3	-9236.6	4148.7	6	31.7383	581.879	249	1414	1526268	187.122	5.67872	0	µm	488		18467.8
B3 001.nd2	10322.4	6777.3	-9236.6	4148.7	7	17.908	501.228	260	1624	741817	159.712	6.24615	0	µm	488		8975.99
B3 001.nd2	10322.4	6777.3	-9236.6	4148.7	8	25.1922	522.418	284	1734	1087674	169.817	6.10563	0	µm	488		13160.9
B3 001.nd2	10322.4	6777.3	-9236.6	4148.7	9	46.0284	562.708	210	1891	2140542	263.867	8.79535	0	µm	488		25900.6
B3 001.nd2	10322.4	6777.3	-9236.6	4148.7	10	25.4221	656.913	236	2620	1380174	296.154	11.1017	0	µm	488		16700.1
B3 001.nd2	10322.4	6777.3	-9236.6	4148.7	11	55.2607	688.133	255	2762	3142705	308.381	9.8155	0	µm	488		38026.7
B3 001.nd2	10322.4	6777.3	-9236.6	4148.7	12	32.9846	603.274	275	1474	1644526	171.179	5.36	0	µm	488		19898.8
B3 001.nd2	10322.4	6777.3	-9236.6	4148.7	13	37.873	948.34	360	2807	2968303	361.803	7.79722	0	µm	488		35916.5
B3 001.nd2	10322.4	6777.3	-9236.6	4148.7	14	42.4468	640.723	272	2599	2247657	236.405	9.55515	0	µm	488		27196.6
B3 001.nd2	10322.4	6777.3	-9236.6	4148.7	15	35.2352	668.125	288	2637	1945581	212.46	8.90878	0	µm	488		23541.5
B3 001.nd2	12560.9	6779.8	-9254	3782.4	1	90.4233	546.005	255	2411	4080293	197.131	9.4549	0	µm	488		49371.5
B3 001.nd2	12560.9	6779.8	-9254	3782.4	2	64.493	531.884	190	2597	2834940	223.271	13.6684	0	µm	488		34302.8
B3 001.nd2	12560.9	6779.8	-9254	3782.4	3	46.2946	660.268	281	1834	2526184	195.873	6.52669	0	µm	488		30566.8
B3 001.nd2	12560.9	6779.8	-9254	3782.4	4	68.6312	536.327	229	2036	3042044	194.835	8.89083	0	µm	488		36808.7
B3 001.nd2	12560.9	6779.8	-9254	3782.4	5	80.0899	650.102	230	2419	4303027	268.885	10.1213	0	µm	488		52066.6
B3 001.nd2	12560.9	6779.8	-9254	3782.4	6	61.3954	570.118	236	3319	2892778	241.709	14.0636	0	µm	488		35002.6
B3 001.nd2	12560.9	6779.8	-9254	3782.4	7	56.9668	397.027	153	1015	1869201	95.6049	6.63399	0	µm	488		22617.3
B3 001.nd2	14603.1	6779.83	-9371.4	3528.9	1	60.016	772.616	155	3130	3832175	332.188	20.1935	0	µm	488		46369.3
B3 001.nd2	14603.1	6779.83	-9371.4	3528.9	2	57.4387	608.492	173	3505	2888513	265.613	18.9459	0	µm	488		34951
B3 001.nd2	14603.1	6779.83	-9371.4	3528.9	3	50.7232	628.948	231	1856	2636551	227.016	7.87446	0	µm	488		31902.3
B3 001.nd2	14603.1	6779.83	-9371.4	3528.9	4	65.4126	574.987	250	2267	3108379	193.728	8.71923	0	µm	488		37611.4
B3 001.nd2	14603.1	6779.83	-9371.4	3528.9	5	45.254	634.961	222	1588	2374753	216.036	7.12108	0	µm	488		28734.5
B3 001.nd2	14603.1	6779.83	-9371.4	3528.9	6	94.1864	414.598	194	1057	3227230	109.711	4.98585	0	µm	488		39049.5
B3 001.nd2	14603.1	6779.83	-9371.4	3528.9	7	72.6	644.956	254	1779	3869738	198.782	6.56458	0	µm	488		46823.8
B3 001.nd2	14603.1	6779.83	-9371.4	3528.9	8	56.0351	492.15	220	1314	2279147	168.814	5.97273	0	µm	488		27577.7
B3 001.nd2	14603.1	6779.83	-9371.4	3528.9	9	86.9385	659.703	269	2552	4739969	226.845	9.28	0	µm	488		57353.6
B3 001.nd2	14603.1	6779.83	-9371.4	3528.9	10	83.3085	832.018	213	2481	5728447	282.219	11.6479	0	µm	488		69314.2
B3 001.nd2	14603.1	6779.83	-9371.4	3528.9	11	99.5346	863.013	276	2358	7099147	277.27	7.93939	0	µm	488		85899.7
B3 001.nd2	14603.1	6779.83	-9371.4	3528.9	12	63.3798	797.47	224	1841	4177148	254.243	8.21875	0	µm	488		50543.5
B3 001.nd2	16740.7	6780.76	-9116.1	3291.3	1	94.5736	990.913	366	2425	7744976	311.462	5.63954	0	µm	488		93714.2
B3 001.nd2	16740.7	6780.76	-9116.1	3291.3	2	32.3917	935.932	234	2659	2505490	410.362	11.3632	0	µm	488		30316.4
B3 001.nd2	16740.7	6780.76	-9116.1	3291.3	3	45.0604	875.767	347	2396	3261358	309.131	6.9049	0	µm	488		39462.4
B3 001.nd2	16740.7	6780.76	-9116.1	3291.3	4	75.0321	713.807	252	1995	4426315	277.608	7.91667	0	µm	488		53558.4
B3 001.nd2	16740.7	6780.76	-9116.1	3291.3	5	61.7342	626.34	243	3183	3195586	268.084	13.0988	0	µm	488		38666.6
B3 001.nd2	16740.7	6780.76	-9116.1	3291.3	6	62.4118	717.969	246	4095	3703283	576.532	16.6463	0	µm	488		44809.7
B3 001.nd2	16740.7	6780.76	-9116.1	3291.3	7	80.0657	822.195	247	2311	5440463	273.883	9.35628	0	µm	488		65829.6
B3 001.nd2	18894.2	6780.74	-9177.8	3161.2	1	87.9307	725.984	298	2696	5275729	251.043	9.04698	0	µm	488		63836.3
B3 001.nd2	18894.2	6780.74	-9177.8	3161.2	2	98.5424	708.291	223	2431	5768321	238.663	10.0493	0	µm	488		69796.7
B3 001.nd2	18894.2	6780.74	-9177.8	3161.2	3	59.1085	545.213	202	4095	2663364	404.718	20.2723	0	µm	488		32226.7
B3 001.nd2	18894.2	6780.74	-9177.8	3161.2	4	44.4917	605.735	298	1628	2227287	178.931	5.46309	0	µm	488		26950.2
B3 001.nd2	18894.2	6780.74	-9177.8	3161.2	5	82.3768	724.876	271	4041	4934955	264.97	14.9114	0	µm	488		59713
B3 001.nd2	18894.2	6780.74	-9177.8	3161.2	6	80.0536	756.524	248	2565	5005165	306.53	10.3427	0	µm	488		60562.5
B3 001.nd2	18894.2	6780.74	-9177.8	3161.2	7	84.4701	901.453	182	2951	6293044	312.351	14.755	0	µm	488		76145.8
B3 001.nd2	18894.2	6780.74	-9177.8	3161.2	8	40.9585	768.04	326	1766	2599815	207.847	5.41718	0	µm	488		31457.8
B3 001.nd2	18894.2	6780.74	-9177.8	3161.2	9	73.0356	854.435	263	2826	5157370	355.325	9.1673	0	µm	488		62404.2
B3 016.nd2	261.083	6737.61	11193.9	-679	1	129.264	673.701	299	2056	7197146	218.043	6.63226	0	µm	488		87085.5
B3 016.nd2	261.083	6737.61	11193.9	-679	2	75.7097	937.699	363	2548	5867183	288.362	6.74074	0	µm	488		70992.9
B3 016.nd2	261.083	6737.61	11193.9	-679	3	29.9717	612.956	271	1392	1518293	196.447	5.13653	0	µm	488		18371.3
B3 016.nd2	261.083	6737.61	11193.9	-679	4	62.2182	647.918	303	1740	3331595	193.353	5.74257	0	µm	488		40312.3
B3 016.nd2	261.083	6737.61	11193.9	-679	5	72.8541	626.391	231	2095	3771500	218.004	7.25974	0	µm	488		45635.2
B3 016.nd2	261.083	6737.61	11193.9	-679	6	105.04	830.008	261	2102	7205302	269.708	6.89789	0	µm	488		87184.2
B3 016.nd2	261.083	6737.61	11193.9	-679	7	65.1222	621.77	181	1861	3346367	205.371	10.1694	0	µm	488		40491
B3 017.nd2	263.571	6737.78	10584.1	348.7	1	37.3648	657.343	292	1981	2029874	247.722	6.78425	0	µm	488		24561.5
B3 017.nd2	263.571	6737.78	10584.1	348.7	2	61.6132	756.815	262	2874	3853704	284.73	10.9695	0	µm	488		46629.8
B3 017.nd2	263.571	6737.78	10584.1	348.7	3	31.5447	899.787	374	1886	2345746	295.588	5.04278	0	µm	488		28383.5
B3 017.nd2	263.571	6737.78	10584.1	348.7	4	83.0423	739.243	268	1827	5073422	258.405	6.81716	0	µm	488		61388.4
B3 018.nd2	264.393	6741.49	9782.1	2691.9	1	68.3529	736.329	354	1505	4159522	211.005	4.25141	0	µm	488		50330.2
B3 018.nd2	264.393	6741.49	9782.1	2691.9	2	51.1951	635.725	317	1676	2689752	204.515	5.28707	0	µm	488		32546
B3 018.nd2	264.393	6741.49	9782.1	2691.9	3	43.6326	737.606	227	2163	2659807	230.82	9.52863	0	µm	488		32183.7
B3 018.nd2	264.393	6741.49	9782.1	2691.9	4	52.6471	665.572	288	4095	2895902	391.693	13.8345	0	µm	488		35040.4
B3 019.nd2	260.383	6737.62	10632	2089.6	1	69.6476	673.238	290	1910	3875158	216.5	5.7099	0	µm	488		46889.4
B3 019.nd2	260.383	6737.62	10632	2089.6	2	55.6842	788.566	303	3128	3628981	231.088	8.9835	0	µm	488		43910.7
B3 019.nd2	260.383	6737.62	10632	2089.6	3	49.0413	627.873	245	1635	2544769	216.043	6.67347	0	µm	488		30791.7
B3 019.nd2	260.383	6737.62	10632	2089.6	4	46.948	746.795	190	2198	2897564	361.718	11.5684	0	µm	488		35060.5
B3 019.nd2	260.383	6737.62	10632	2089.6	5	54.5589	862.629	339	4095	3889595	339.885	12.0796	0	µm	488		47064.1
B3 019.nd2	260.383	6737.62	10632	2089.6	6	28.1809	743.934	244	2299	1732622	352.936	9.42213	0	µm	488		20964.7
B3 019.nd2	260.383	6737.62	10632	2089.6	7	51.6912	778.229	284	3257	3324594	273.271	11.4683	0	µm	488		40227.6
B3 019.nd2	260.383	6737.62	10632	2089.6	8	36.3968	531.472	247	1267	1598668	135.617	5.12955	0	µm	488		19343.9
B3 019.nd2	260.383	6737.62	10632	2089.6	9	39.5912	682.506	247	1834	2233159	234.388	6.79259	0	µm	488		27021.2
B3 020.nd2	292.031	6737.62	10685.7	1801.9	1	78.5653	528.079	181	1307	3428819	174.493	6.77202	0	µm	488		41488.7
B3 020.nd2	292.031	6737.62	10685.7	1801.9	2	49.247	551.662	211	1577	2245263	218.749	7.47393	0	µm	488		27167.7
B3 020.nd2	292.031	6737.62	10685.7	1801.9	3	56.9668	568.103	217	2676	2674627	268.109	11.6348	0	µm	488		32363
B3 020.nd2	292.031	6737.62	10685.7	1801.9	4	33.8074	515.753	221	2466	1441015	186.955	11.1584	0	µm	488		17436.3
B3 020.nd2	292.031	6737.62	10685.7	1801.9	5	57.2088	530.67	229	2785	2509009	234.411	9.1048	0	µm	488		30359
B3 020.nd2	292.031	6737.62	10685.7	1801.9	6	24.7808	683.015	256	1895	1398814	262.303	7.40234	0	µm	488		16925.6
B3 020.nd2	292.031	6737.62	10685.7	1801.9	7	58.4914	519.549	196	1375	2511499	184.143	6.85714	0	µm	488		30389.1
B3 020.nd2	292.031	6737.62	10685.7	1801.9	8	85.3776	529.115	237	3494	3733434	257.74	14.7426	0	µm	488		45174.6
B3 020.nd2	292.031	6737.62	10685.7	1801.9	9	42.8703	597.624	187	3748	2117381	349.108	15.3286	0	µm	488		25620.3
B3 020.nd2	292.031	6737.62	10685.7	1801.9	10	50.5175	773.522	224	4095	3229455	296.617	18.2812	0	µm	488		39076.4
B3 020.nd2	292.031	6737.62	10685.7	1801.9	11	32.065	577.02	228	1273	1529102	178.835	5.58333	0	µm	488		18502.1
B3 020.nd2	292.031	6737.62	10685.7	1801.9	12	36.8082	562.017	241	1213	1709657	173.543	5.0332	0	µm	488		20686.8
B3 020.nd2	292.031	6737.62	10685.7	1801.9	13	79.4607	649.348	231	1791	4264270	211.903	7.75325	0	µm	488		51597.7
B3 020.nd2	292.031	6737.62	10685.7	1801.9	14	29.524	674.717	205	2834	1646309	236.692	13.8244	0	µm	488		19920.3
B3 020.nd2	292.031	6737.62	10685.7	1801.9	15	49.5737	635.431	206	2873	2603359	235.083	10.9414	0	µm	488		31500.6
B3 021.nd2	274.035	6741.41	9751.2	1236.1	1	34.9932	594.346	311	1215	1718848	139.529	3.90675	0	µm	488		20798.1
B3 021.nd2	274.035	6741.41	9751.2	1236.1	2	42.6162	557.908	255	1874	1964953	178.078	7.34902	0	µm	488		23775.9
B3 021.nd2	274.035	6741.41	9751.2	1236.1	3	97.6349	650.185	235	1807	5246346	215.42	7.08627	0	µm	488		63480.8
B3 021.nd2	274.035	6741.41	9751.2	1236.1	4	47.5167	568.565	258	2284	2232754	165.644	8.39706	0	µm	488		27016.3
B3 021.nd2	274.035	6741.41	9751.2	1236.1	5	57.7049	661.249	307	1678	3153495	203.709	5.21974	0	µm	488		38157.3
B3 021.nd2	274.035	6741.41	9751.2	1236.1	6	23.5103	676.278	207	1494	1314008	189.609	7.21739	0	µm	488		15899.5
B3 021.nd2	274.035	6741.41	9751.2	1236.1	7	40.4987	789.205	357	1714	2641468	231.562	4.80112	0	µm	488		31961.8
B3 021.nd2	274.035	6741.41	9751.2	1236.1	8	45.0362	766.429	301	2183	2852649	236.775	7.25249	0	µm	488		34517.1
B3 021.nd2	274.035	6741.41	9751.2	1236.1	9	86.515	597.166	238	1704	4269734	195.976	6.63035	0	µm	488		51663.8
B3 021.nd2	274.035	6741.41	9751.2	1236.1	10	48.2548	724.556	297	2118	2889530	253.882	6.61875	0	µm	488		34963.3
B3 021.nd2	274.035	6741.41	9751.2	1236.1	11	52.3083	546.366	224	1455	2361941	174.944	6.49554	0	µm	488		28579.5
B3 021.nd2	274.035	6741.41	9751.2	1236.1	12	17.0973	680.662	248	1376	961775	179.184	5.54839	0	µm	488		11637.5
B3 021.nd2	274.035	6741.41	9751.2	1236.1	13	33.5896	653.131	291	1803	1813091	167.27	6.19588	0	µm	488		21938.4
B3 021.nd2	274.035	6741.41	9751.2	1236.1	14	29.5361	553.177	182	1793	1350306	179.802	9.85165	0	µm	488		16338.7
B3 021.nd2	274.035	6741.41	9751.2	1236.1	15	42.4468	797.897	294	1547	2799022	218.797	5.2619	0	µm	488		33868.2
B3 021.nd2	274.035	6741.41	9751.2	1236.1	16	88.3663	669.478	236	1637	4889195	173.867	5.668	0	µm	488		59159.3
B3 022.nd2	272.48	6738.98	9600.5	1044	1	46.2704	776.84	271	2145	2970638	256.81	7.91513	0	µm	488		35944.7
B3 022.nd2	272.48	6738.98	9600.5	1044	2	55.7084	839.339	375	2297	3864315	277.901	5.78608	0	µm	488		46758.2
B3 022.nd2	272.48	6738.98	9600.5	1044	3	98.3609	735.831	237	4095	5981567	376.297	16.7828	0	µm	488		72377
B3 022.nd2	272.48	6738.98	9600.5	1044	4	40.1357	867.539	275	3251	2877626	285.192	11.8218	0	µm	488		34819.3
B3 022.nd2	272.48	6738.98	9600.5	1044	5	31.1454	685.58	303	1627	1764682	240.856	5.36964	0	µm	488		21352.7
B3 023.nd2	268.869	6739.05	9640.6	650.2	1	49.3075	675.688	227	4095	2753429	278.956	18.0396	0	µm	488		33316.5
B3 023.nd2	268.869	6739.05	9640.6	650.2	2	40.3898	606.101	224	1688	2023166	286.077	7.53571	0	µm	488		24480.3
B3 023.nd2	268.869	6739.05	9640.6	650.2	3	95.2149	626.079	265	1566	4926617	157.587	5.90943	0	µm	488		59612.1
B3 023.nd2	268.869	6739.05	9640.6	650.2	4	40.535	656.344	276	1521	2198752	189.311	5.51087	0	µm	488		26604.9
B3 023.nd2	268.869	6739.05	9640.6	650.2	5	30.4194	536.309	287	1297	1348280	142.936	4.50347	0	µm	488		16314.2
B3 023.nd2	268.869	6739.05	9640.6	650.2	6	37.8004	667.649	265	1548	2085736	185.126	5.84151	0	µm	488		25237.4
B3 023.nd2	268.869	6739.05	9640.6	650.2	7	20.3401	735.608	266	1895	1236557	317.684	7.12406	0	µm	488		14962.3
B3 023.nd2	268.869	6739.05	9640.6	650.2	8	31.7383	689.481	375	1815	1808509	187.043	4.84	0	µm	488		21883
B3 023.nd2	268.869	6739.05	9640.6	650.2	9	63.5492	779.761	221	1815	4095303	231.759	8.21267	0	µm	488		49553.2
B3 023.nd2	268.869	6739.05	9640.6	650.2	10	32.186	858.621	319	2936	2283931	250.43	9.20376	0	µm	488		27635.6
B3 023.nd2	268.869	6739.05	9640.6	650.2	11	26.7047	775.368	339	2296	1711237	280.27	6.77286	0	µm	488		20706
B3 023.nd2	268.869	6739.05	9640.6	650.2	12	53.0948	680.202	202	2881	2984725	266.091	14.2624	0	µm	488		36115.2
B3 023.nd2	268.869	6739.05	9640.6	650.2	13	18.8034	568.97	272	1392	884180	166.879	5.11765	0	µm	488		10698.6
B3 024.nd2	270.927	6738.36	9642.2	363.1	1	28.4471	921.521	438	1832	2166495	260.138	4.18265	0	µm	488		26214.6
B3 024.nd2	270.927	6738.36	9642.2	363.1	2	43.7415	636.981	273	1629	2302685	208.168	5.96703	0	µm	488		27862.5
B3 024.nd2	270.927	6738.36	9642.2	363.1	3	75.9275	666.136	289	2685	4180005	259.68	9.0404	0	µm	488		50578.1
B3 024.nd2	270.927	6738.36	9642.2	363.1	4	49.6342	663.981	280	2393	2723652	190.751	8.28028	0	µm	488		32956.2
B3 024.nd2	270.927	6738.36	9642.2	363.1	5	42.2169	581.144	244	1295	2027610	160.907	4.7786	0	µm	488		24534.1
B3 025.nd2	269.395	6739.35	9551.3	-36.4	1	35.1142	652.287	277	2621	1892937	237.991	9.46209	0	µm	488		22904.5
B3 025.nd2	269.395	6739.35	9551.3	-36.4	2	24.3815	872.368	225	2025	1757822	338.901	9	0	µm	488		21269.6
B3 025.nd2	269.395	6739.35	9551.3	-36.4	3	42.3742	464.551	202	1617	1626858	218.43	8.00495	0	µm	488		19685
B3 025.nd2	269.395	6739.35	9551.3	-36.4	4	83.4053	788.18	214	2570	5432928	311.893	10.6198	0	µm	488		65738.4
B3 025.nd2	269.395	6739.35	9551.3	-36.4	5	38.1513	618.886	201	1335	1951346	180.251	6.64179	0	µm	488		23611.3
B3 025.nd2	269.395	6739.35	9551.3	-36.4	6	70.6277	939.878	242	2777	5486066	339.01	10.1722	0	µm	488		66381.4
B3 025.nd2	269.395	6739.35	9551.3	-36.4	7	53.7724	761.004	207	3173	3381903	317.935	15.3285	0	µm	488		40921
																	39614.4
