# Supplementary material for: Aurora kinase A promotes trained immunity via regulation of endogenous S-adenosylmethionine metabolism
Source: eLife journal article supplement (doi:10.7554/elife.104138), 2025-01-08
Supplement: fig6-data1 [file B4.xlsx]

## Sheet: ROI Statistics
FileName	Time (ms)	Z Pos	X Pos	Y Pos	ROI ID	ROI Area [µm²]	ROI Mean Intensity	ROI Min Intensity	ROI Max Intensity	ROI Sum Intensity	ROI StDev Intensity	ROI Signal/Background	Area Fraction	Unit	Channel		47233.3
b 005.nd2	183.893	7249.69	-986.3	4133.9	1	52.6955	896.344	380	3250	3903579	476.891	8.53018	0	µm	488		55128.4
b 006.nd2	2036.15	7233.4	782.2	2586.6	1	45.3508	1215.6	436	2863	4556066	354.553	6.56651	0	µm	488		43664.4
b 007.nd2	7916.06	7233.4	782.1	2586.4	1	41.9628	1040.55	354	2079	3608632	308.223	5.87288	0	µm	488		35771.7
b 009.nd2	191.222	7241.8	-520.4	3588.4	1	32.8152	1090.1	379	4095	2956341	707.035	10.8047	0	µm	488		22958.5
b 010.nd2	192.375	7244.86	-658.4	3614.4	1	20.8846	1099.3	515	4095	1897394	513.312	7.95146	0	µm	488		50631.7
b 013.nd2	4068.93	7226.21	-391.5	1982.3	1	40.5108	1249.83	502	3269	4184442	487.372	6.51195	0	µm	488		36190.4
b 015.nd2	186.26	7229.65	1192.5	2070.9	1	45.4718	795.886	368	1559	2990940	210.981	4.08115	0	µm	488		11127.4
b 015.nd2	186.26	7229.65	1192.5	2070.9	2	16.9521	656.403	272	1407	919620	212.268	5.17279	0	µm	488
																	37838.2
