# Supplementary material for: Aurora kinase A promotes trained immunity via regulation of endogenous S-adenosylmethionine metabolism
Source: eLife journal article supplement (doi:10.7554/elife.104138), 2025-01-08
Supplement: fig6-data1 [file b5.xlsx]

## Sheet: ROI Statistics
FileName	Time (ms)	Z Pos	X Pos	Y Pos	ROI ID	ROI Area [µm²]	ROI Mean Intensity	ROI Min Intensity	ROI Max Intensity	ROI Sum Intensity	ROI StDev Intensity	ROI Signal/Background	Area Fraction	Unit	Channel
B5 001.nd2	286.702	6732.79	456.8	252.6	1	71.6683	1141.57	437	4095	6761498	524.018	9.37071	0	µm	488		81814.1
B5 001.nd2	286.702	6732.79	456.8	252.6	2	72.5153	1286.42	550	3463	7709511	471.684	6.29636	0	µm	488		93285.1
B5 001.nd2	286.702	6732.79	456.8	252.6	3	107.593	1194.75	335	3699	10623694	380.935	11.0418	0	µm	488		128547
B5 001.nd2	286.702	6732.79	456.8	252.6	4	94.2106	1294.88	561	4002	10081945	488.656	6.98429	0	µm	488		121992
B5 001.nd2	286.702	6732.79	456.8	252.6	5	133.088	1407.74	484	4024	15483738	492.102	6.83588	0	µm	488		187353
B5 001.nd2	286.702	6732.79	456.8	252.6	6	116.438	1546.04	355	3614	14877540	485.383	9.24297	0	µm	488		180018
B5 001.nd2	286.702	6732.79	456.8	252.6	7	73.1566	1549.78	650	3554	9369974	537.68	5.273	0	µm	488		113377
B5 001.nd2	286.702	6732.79	456.8	252.6	8	69.2725	1272.42	528	4095	7284617	409.092	7.75568	0	µm	488		88143.9
B5 001.nd2	286.702	6732.79	456.8	252.6	9	38.4538	1604.99	744	3634	5100669	370.937	4.84533	0	µm	488		61718.1
B5 002.nd2	1958.96	6731.9	343.3	1516.2	1	55.8294	1104.31	452	2554	5095287	360.383	5.65044	0	µm	488		61653
B5 002.nd2	1958.96	6731.9	343.3	1516.2	2	36.8929	1712.41	814	4095	5221135	483.031	5.03071	0	µm	488		63175.7
B5 002.nd2	1958.96	6731.9	343.3	1516.2	3	42.4952	1510.34	553	3589	5304322	471.878	6.49005	0	µm	488		64182.3
B5 002.nd2	1958.96	6731.9	343.3	1516.2	4	68.0746	1352.38	534	2936	7608501	445.741	5.49813	0	µm	488		92062.9
B5 002.nd2	1958.96	6731.9	343.3	1516.2	5	36.0822	1461.79	585	3997	4359051	581.306	6.83248	0	µm	488		52744.5
B5 002.nd2	1958.96	6731.9	343.3	1516.2	6	35.2715	1263.85	513	2851	3684133	413.283	5.5575	0	µm	488		44578
B5 002.nd2	1958.96	6731.9	343.3	1516.2	7	41.2368	1222.07	520	3203	4164799	430.505	6.15961	0	µm	488		50394.1
B5 002.nd2	1958.96	6731.9	343.3	1516.2	8	14.9435	919.613	515	2132	1135722	291.788	4.13981	0	µm	488		13742.2
B5 002.nd2	1958.96	6731.9	343.3	1516.2	9	89.1044	1157.91	495	3652	8526856	288.668	7.0096	0	µm	488		103175
B5 002.nd2	1958.96	6731.9	343.3	1516.2	10	55.7326	747.491	409	2169	3442942	197.372	5.23913	0	µm	488		41659.6
B5 002.nd2	1958.96	6731.9	343.3	1516.2	11	56.3134	881.368	373	2726	4101887	322.432	6.66504	0	µm	488		49632.8
B5 002.nd2	1958.96	6731.9	343.3	1516.2	12	32.2828	1317.75	510	3573	3515754	431.851	7.00588	0	µm	488		42540.6
B5 002.nd2	1958.96	6731.9	343.3	1516.2	13	45.7017	1239.6	591	2890	4681985	427.61	4.89002	0	µm	488		56652
B5 002.nd2	1958.96	6731.9	343.3	1516.2	14	83.2359	1240.4	309	2743	8532724	357.239	8.87702	0	µm	488		103246
B5 002.nd2	1958.96	6731.9	343.3	1516.2	15	68.2077	1200.21	398	4095	6765591	532.784	10.2889	0	µm	488		81863.7
B5 003.nd2	793.37	6732.52	622.1	358.6	1	113.232	1092.1	427	2977	10219860	351.394	6.9719	0	µm	488		123660
B5 003.nd2	793.37	6732.52	622.1	358.6	2	60.6573	1165.45	540	3064	5842407	387.473	5.51079	0	µm	488		70693.1
B5 003.nd2	793.37	6732.52	622.1	358.6	3	76.5083	1341.1	566	4095	8479785	462.213	7.23498	0	µm	488		102605
B5 003.nd2	793.37	6732.52	622.1	358.6	4	52.3688	1152.91	582	4095	4989780	327.606	7.03608	0	µm	488		60376.3
B5 003.nd2	793.37	6732.52	622.1	358.6	5	88.2453	1136.14	448	4095	8285848	427.422	9.14062	0	µm	488		100259
B5 003.nd2	2821.82	6733.03	748.2	428	1	76.8713	1089.7	422	2500	6922878	350.065	5.64334	0	µm	488		83766.8
B5 003.nd2	2821.82	6733.03	748.2	428	2	75.0321	1118.79	522	2314	6937643	231.264	4.43295	0	µm	488		83945.5
B5 003.nd2	2821.82	6733.03	748.2	428	3	101.241	1167.81	456	3560	9771099	399.705	7.38589	0	µm	488		118230
B5 003.nd2	2821.82	6733.03	748.2	428	4	71.4384	1170.07	460	3013	6908090	410.511	6.55	0	µm	488		83587.9
B5 003.nd2	2821.82	6733.03	748.2	428	5	86.5029	1189.4	492	4095	8503032	327.167	8.32317	0	µm	488		102887
B5 003.nd2	2821.82	6733.03	748.2	428	6	117.902	1226.07	531	3072	11946836	318.263	4.72993	0	µm	488		144557
B5 003.nd2	2821.82	6733.03	748.2	428	7	71.1843	1207.45	504	2703	7103403	314.559	5.3631	0	µm	488		85951.2
B5 003.nd2	2821.82	6733.03	748.2	428	8	39.9784	1033.4	413	2482	3414365	373.449	6.00969	0	µm	488		41313.8
B5 003.nd2	4998.18	6732.07	139.1	503	1	91.6091	1241.59	552	2881	9400111	395.17	5.11723	0	µm	488		113741
B5 003.nd2	4998.18	6732.07	139.1	503	2	138.363	1547.71	513	4095	17698057	595.879	7.56932	0	µm	488		214146
B5 003.nd2	4998.18	6732.07	139.1	503	3	80.7191	1241.34	486	3721	8281005	391.731	7.65638	0	µm	488		100200
B5 003.nd2	4998.18	6732.07	139.1	503	4	57.1241	1270.07	432	2466	5995995	363.998	5.24681	0	µm	488		72551.5
B5 003.nd2	4998.18	6732.07	139.1	503	5	154.13	1294.93	486	3101	16494824	424.044	5.67692	0	µm	488		199587
B5 003.nd2	4998.18	6732.07	139.1	503	6	137.964	1403.36	335	4095	16001111	497.465	8.37423	0	µm	488		193613
B5 003.nd2	4998.18	6732.07	139.1	503	7	61.4438	1258.89	545	3245	6392631	447.576	5.95413	0	µm	488		77350.8
B5 003.nd2	7072.44	6730	-47.3	503.1	1	81.1668	1121.25	276	2710	7521346	389.046	8.99638	0	µm	488		91008.3
B5 003.nd2	7072.44	6730	-47.3	503.1	2	78.1539	1118.06	447	3169	7221569	382.239	7.08948	0	µm	488		87381
B5 003.nd2	7072.44	6730	-47.3	503.1	3	72.1644	1171.41	376	4095	6986317	407.976	10.891	0	µm	488		84534.4
B5 003.nd2	7072.44	6730	-47.3	503.1	4	110.534	1112.94	212	3079	10166673	304.26	11.5045	0	µm	488		123017
B5 003.nd2	7072.44	6730	-47.3	503.1	5	49.2349	1161.79	510	2903	4727341	397.688	5.69216	0	µm	488		57200.8
B5 003.nd2	7072.44	6730	-47.3	503.1	6	72.4548	1338.26	514	4095	8013530	549.576	7.96693	0	µm	488		96963.7
B5 003.nd2	7072.44	6730	-47.3	503.1	7	88.2574	1420.86	485	4095	10363719	550.984	8.4433	0	µm	488		125401
B5 003.nd2	7072.44	6730	-47.3	503.1	8	55.8052	953.56	428	4095	4397820	416.553	8.96061	0	µm	488		53213.6
B5 003.nd2	7072.44	6730	-47.3	503.1	9	84.5911	1268.45	576	4095	8867716	371.034	6.98806	0	µm	488		107299
B5 003.nd2	7072.44	6730	-47.3	503.1	10	44.2618	1153.76	541	2444	4220448	292.398	4.41953	0	µm	488		51067.4
B5 003.nd2	7072.44	6730	-47.3	503.1	11	83.9014	1311.05	570	3470	9090854	427.554	5.99309	0	µm	488		109999
B5 003.nd2	7072.44	6730	-47.3	503.1	12	101.083	1719.12	573	4095	14361519	561.024	7.1466	0	µm	488		173774
B5 003.nd2	7072.44	6730	-47.3	503.1	13	71.9224	1473.71	593	4095	8759755	537.567	6.90557	0	µm	488		105993
B5 003.nd2	7072.44	6730	-47.3	503.1	14	89.5763	1620.59	593	3539	11997199	492.512	5.96796	0	µm	488		145166
B5 003.nd2	9149.45	6729.53	-416.1	470.5	1	114.236	1276.02	390	3411	12046916	371.714	8.74615	0	µm	488		145768
B5 003.nd2	9149.45	6729.53	-416.1	470.5	2	65.4247	1156.43	499	3597	6252826	402.198	7.20842	0	µm	488		75659.2
B5 003.nd2	9149.45	6729.53	-416.1	470.5	3	69.3935	1286	339	4083	7375200	489.88	12.0442	0	µm	488		89239.9
B5 003.nd2	9149.45	6729.53	-416.1	470.5	4	63.9606	1222.47	540	2402	6461993	322.175	4.44815	0	µm	488		78190.1
B5 003.nd2	9149.45	6729.53	-416.1	470.5	5	70.301	1118.86	496	2282	6500561	338.113	4.60081	0	µm	488		78656.8
B5 003.nd2	9149.45	6729.53	-416.1	470.5	6	85.8495	1280.09	554	3860	9082233	379.54	5.8917	0	µm	488		109895
B5 003.nd2	9149.45	6729.53	-416.1	470.5	7	21.9978	1147.46	569	2775	2086078	299.177	4.87698	0	µm	488		25241.5
B5 003.nd2	9149.45	6729.53	-416.1	470.5	8	38.8894	1023.25	525	2748	3288714	247.989	5.23429	0	µm	488		39793.4
B5 003.nd2	9149.45	6729.53	-416.1	470.5	9	45.1209	846.391	249	1584	3156191	196.069	6.36145	0	µm	488		38189.9
B5 003.nd2	9149.45	6729.53	-416.1	470.5	10	13.4068	1117.88	682	1972	1238607	220.131	2.8915	0	µm	488		14987.1
B5 003.nd2	9149.45	6729.53	-416.1	470.5	11	44.5038	1288.97	632	2583	4740850	277.114	4.08702	0	µm	488		57364.3
B5 003.nd2	9149.45	6729.53	-416.1	470.5	12	48.6299	1409.4	475	4095	5664397	723.767	8.62105	0	µm	488		68539.2
B5 003.nd2	9149.45	6729.53	-416.1	470.5	13	58.7576	1157.83	434	2515	5622443	327.806	5.6772	0	µm	488		68031.6
B5 003.nd2	11210.1	6729.69	-430.7	327.2	1	74.2335	1299.2	541	2702	7970569	320.812	4.99446	0	µm	488		96443.9
B5 003.nd2	11210.1	6729.69	-430.7	327.2	2	91.5365	1134.65	576	3530	8583642	328.971	6.12847	0	µm	488		103862
B5 003.nd2	11210.1	6729.69	-430.7	327.2	3	53.6877	1089.51	465	2196	4834164	335.433	4.55602	0	µm	488		58493.4
B5 003.nd2	11210.1	6729.69	-430.7	327.2	4	49.9367	989.72	446	2580	4084576	302.373	5.78475	0	µm	488		49423.4
B5 003.nd2	11210.1	6729.69	-430.7	327.2	5	69.1636	1141.54	463	2698	6525046	271.744	5.82721	0	µm	488		78953.1
B5 003.nd2	11210.1	6729.69	-430.7	327.2	6	31.218	1005.77	498	1759	2594881	224.033	3.53213	0	µm	488		31398.1
B5 003.nd2	11210.1	6729.69	-430.7	327.2	7	68.2319	1286.77	575	3516	7256097	309.261	6.11478	0	µm	488		87798.8
B5 003.nd2	11210.1	6729.69	-430.7	327.2	8	78.6742	1232.01	556	4095	8010545	530.469	7.36511	0	µm	488		96927.6
B5 003.nd2	11210.1	6729.69	-430.7	327.2	9	69.3572	720.125	345	1401	4127754	180.328	4.06087	0	µm	488		49945.8
B5 003.nd2	11210.1	6729.69	-430.7	327.2	10	48.7509	895.767	370	2140	3609044	262.23	5.36341	0	µm	488		43669.4
B5 003.nd2	11210.1	6729.69	-430.7	327.2	11	66.7073	842.196	397	2201	4643027	268.41	5.30361	0	µm	488		56180.6
B5 003.nd2	13424	6731.49	-147.3	775	1	47.8676	1115.22	387	3540	4411791	334.04	9.14729	0	µm	488		53382.7
B5 003.nd2	13424	6731.49	-147.3	775	2	58.6003	924.356	471	3200	4476655	290.312	6.79406	0	µm	488		54167.5
B5 003.nd2	13424	6731.49	-147.3	775	3	42.4952	1408.95	683	3818	4948239	431.859	5.59004	0	µm	488		59873.7
B5 003.nd2	13424	6731.49	-147.3	775	4	63.5976	874.849	442	2259	4598207	212.189	4.48214	0	µm	488		55638.3
B5 003.nd2	13424	6731.49	-147.3	775	5	64.9165	1026.44	417	2965	5506848	355.257	7.11031	0	µm	488		66632.9
B5 003.nd2	13424	6731.49	-147.3	775	6	70.7971	1294.52	483	3380	7574216	470.469	6.99793	0	µm	488		91648
B5 003.nd2	13424	6731.49	-147.3	775	7	27.2976	1316.81	497	3277	2970724	545.241	6.59356	0	µm	488		35945.8
B5 003.nd2	13424	6731.49	-147.3	775	8	80.9974	889.138	424	1836	5951890	215.17	4.29977	0	µm	488		72017.9
B5 003.nd2	13424	6731.49	-147.3	775	9	59.7256	765.037	397	1878	3776221	195.211	4.63704	0	µm	488		45692.3
B5 003.nd2	13424	6731.49	-147.3	775	10	56.8821	1395.04	486	3840	6558073	490.01	7.90123	0	µm	488		79352.7
B5 003.nd2	13424	6731.49	-147.3	775	11	54.3048	1170.33	411	2646	5252431	412.439	6.43796	0	µm	488		63554.4
B5 003.nd2	13424	6731.49	-147.3	775	12	74.4271	1319.61	622	2882	8116924	302.865	4.63344	0	µm	488		98214.8
B5 003.nd2	13424	6731.49	-147.3	775	13	96.7637	908.922	384	2428	7268651	261.553	6.32292	0	µm	488		87950.7
B5 003.nd2	13424	6731.49	-147.3	775	14	75.2257	1185.63	509	2562	7371046	316.898	5.0334	0	µm	488		89189.7
B5 003.nd2	13424	6731.49	-147.3	775	15	56.4586	1313.41	295	3742	6128365	333.356	12.6847	0	µm	488		74153.2
B5 003.nd2	13424	6731.49	-147.3	775	16	39.8332	1055.98	394	2553	3476287	262.324	6.4797	0	µm	488		42063.1
B5 003.nd2	13424	6731.49	-147.3	775	17	22.3729	960.654	529	2595	1776250	231.523	4.90548	0	µm	488		21492.6
B5 003.nd2	13424	6731.49	-147.3	775	18	32.4401	1504.73	823	3168	4034172	400.927	3.82147	0	µm	488		48813.5
B5 003.nd2	15474.8	6729.75	-9.8	869.4	1	64.6624	1134.53	353	2807	6062929	422.343	7.95184	0	µm	488		73361.4
B5 003.nd2	15474.8	6729.75	-9.8	869.4	2	92.3835	1199.16	533	3100	9155552	349.567	5.81614	0	µm	488		110782
B5 003.nd2	15474.8	6729.75	-9.8	869.4	3	52.3083	893.189	342	2728	3861258	282.731	7.97661	0	µm	488		46721.2
B5 003.nd2	15474.8	6729.75	-9.8	869.4	4	65.2069	912.81	387	3235	4919131	210.95	7.89024	0	µm	488		59521.5
B5 003.nd2	15474.8	6729.75	-9.8	869.4	5	72.9751	1046.92	501	4090	6313973	339.126	8.16367	0	µm	488		76399.1
B5 003.nd2	15474.8	6729.75	-9.8	869.4	6	68.3045	1151.15	450	3245	6498259	308.138	7.02381	0	µm	488		78628.9
B5 003.nd2	15474.8	6729.75	-9.8	869.4	7	80.707	929.988	424	3089	6203021	289.414	7.28538	0	µm	488		75056.6
B5 003.nd2	15474.8	6729.75	-9.8	869.4	8	41.6966	1095.88	459	2719	3776397	342.635	5.92375	0	µm	488		45694.4
B5 003.nd2	15474.8	6729.75	-9.8	869.4	9	59.9071	1046.85	511	2001	5182970	262.1	3.77547	0	µm	488		62713.9
B5 003.nd2	15474.8	6729.75	-9.8	869.4	10	58.1526	955.308	438	2312	4591212	319.014	5.25455	0	µm	488		55553.7
B5 003.nd2	15474.8	6729.75	-9.8	869.4	11	52.3809	798.608	382	1866	3457176	239.186	4.88482	0	µm	488		41831.8
B5 003.nd2	15474.8	6729.75	-9.8	869.4	12	74.4755	1031.4	398	2850	6348283	247.779	7.1608	0	µm	488		76814.2
B5 003.nd2	15474.8	6729.75	-9.8	869.4	13	56.1198	860.955	297	2115	3993108	277.929	6.9802	0	µm	488		48316.6
B5 003.nd2	15474.8	6729.75	-9.8	869.4	14	37.2317	901.144	481	1730	2772819	226.71	3.59667	0	µm	488		33551.1
B5 003.nd2	17504.2	6729.24	221.2	886.1	1	51.6065	929.719	338	2443	3965253	281.778	7.22781	0	µm	488		47979.6
B5 003.nd2	17504.2	6729.24	221.2	886.1	2	85.547	817.501	323	1817	5779729	227.195	5.17664	0	µm	488		69934.7
B5 003.nd2	17504.2	6729.24	221.2	886.1	3	48.7509	811.686	444	2254	3270281	228.791	5.07658	0	µm	488		39570.4
B5 003.nd2	17504.2	6729.24	221.2	886.1	4	45.7017	892.703	408	2102	3371738	310.721	4.97794	0	µm	488		40798
B5 003.nd2	17504.2	6729.24	221.2	886.1	5	41.3457	1037.72	480	4095	3545903	361.798	8.53125	0	µm	488		42905.4
B5 003.nd2	17504.2	6729.24	221.2	886.1	6	59.6167	1149.55	470	3037	5663831	364.183	6.4617	0	µm	488		68532.4
B5 003.nd2	17504.2	6729.24	221.2	886.1	7	55.5148	1548.04	432	2980	7102395	446.83	6.89815	0	µm	488		85939
B5 003.nd2	17504.2	6729.24	221.2	886.1	8	16.2987	950.281	474	2233	1280028	269.677	4.71097	0	µm	488		15488.3
B5 003.nd2	17504.2	6729.24	221.2	886.1	9	15.367	706.669	372	1250	897470	172.411	3.36022	0	µm	488		10859.4
B5 003.nd2	17504.2	6729.24	221.2	886.1	10	90.871	1266.29	416	3535	9509818	399.123	8.4976	0	µm	488		115069
B5 003.nd2	17504.2	6729.24	221.2	886.1	11	39.93	953.567	479	3785	3146772	275.197	7.90188	0	µm	488		38075.9
B5 003.nd2	17504.2	6729.24	221.2	886.1	12	52.6592	955.188	404	2720	4156978	237.038	6.73267	0	µm	488		50299.4
B5 003.nd2	17504.2	6729.24	221.2	886.1	13	89.0923	1493.64	345	4095	10997708	477.489	11.8696	0	µm	488		133072
B5 003.nd2	19556.5	6731.8	214.2	1177.2	1	72.9872	929.566	404	2559	5607141	289.886	6.33416	0	µm	488		67846.4
B5 003.nd2	19556.5	6731.8	214.2	1177.2	2	40.8738	1187.27	395	2911	4010587	396.298	7.36962	0	µm	488		48528.1
B5 003.nd2	19556.5	6731.8	214.2	1177.2	3	34.606	1203.72	581	3842	3442640	398.177	6.61274	0	µm	488		41655.9
B5 003.nd2	19556.5	6731.8	214.2	1177.2	4	56.4586	1082.64	402	3715	5051617	431.897	9.24129	0	µm	488		61124.6
B5 003.nd2	19556.5	6731.8	214.2	1177.2	5	73.0235	946.63	427	2480	5712915	327.753	5.80796	0	µm	488		69126.3
B5 003.nd2	19556.5	6731.8	214.2	1177.2	6	35.5982	848.59	388	2488	2496551	276.403	6.41237	0	µm	488		30208.3
B5 003.nd2	19556.5	6731.8	214.2	1177.2	7	59.9434	1214.34	581	3063	6015834	303.075	5.27194	0	µm	488		72791.6
B5 003.nd2	19556.5	6731.8	214.2	1177.2	8	58.8423	958.597	424	2698	4661656	270.879	6.36321	0	µm	488		56406
B5 003.nd2	19556.5	6731.8	214.2	1177.2	9	68.7885	1062.6	528	3298	6040896	318.651	6.24621	0	µm	488		73094.8
B5 003.nd2	19556.5	6731.8	214.2	1177.2	10	58.4067	1249.74	543	4095	6032509	409.528	7.54144	0	µm	488		72993.4
B5 003.nd2	19556.5	6731.8	214.2	1177.2	11	57.2088	977.524	450	2304	4621732	316.743	4.99783	0	µm	488		55923
B5 003.nd2	19556.5	6731.8	214.2	1177.2	12	53.1069	915.042	245	3560	4016121	282.967	14.5306	0	µm	488		48595.1
B5 003.nd2	19556.5	6731.8	214.2	1177.2	13	107.884	815.506	331	2241	7271055	221.112	5.76133	0	µm	488		87979.8
B5 003.nd2	19556.5	6731.8	214.2	1177.2	14	70.5551	1179.1	474	3237	6875345	456.124	6.60612	0	µm	488		83191.7
B5 003.nd2	19556.5	6731.8	214.2	1177.2	15	100.333	970.758	363	2949	8049523	349.291	8.12397	0	µm	488		97399.2
B5 003.nd2	19556.5	6731.8	214.2	1177.2	16	71.4263	994.974	455	3830	5873334	358.052	8.14894	0	µm	488		71067.3
B5 003.nd2	19556.5	6731.8	214.2	1177.2	17	55.9504	1032.8	276	2651	4775672	368.506	8.05775	0	µm	488		57785.6
B5 003.nd2	19556.5	6731.8	214.2	1177.2	18	33.9405	1010.02	487	3224	2833101	247.322	6.62012	0	µm	488		34280.5
B5 003.nd2	21674.5	6730.12	-76	1246.2	1	65.0496	1153.26	497	3066	6199916	363.189	6.16901	0	µm	488		75019
B5 003.nd2	21674.5	6730.12	-76	1246.2	2	64.0453	957.005	460	3990	5065429	295.581	8.67391	0	µm	488		61291.7
B5 003.nd2	21674.5	6730.12	-76	1246.2	3	77.198	823.213	403	2094	5252098	208.449	5.19603	0	µm	488		63550.4
B5 003.nd2	21674.5	6730.12	-76	1246.2	4	51.2919	1102.04	436	2693	4671549	300.493	6.17661	0	µm	488		56525.7
B5 003.nd2	23655.9	6729.77	-263.9	1225.7	1	55.3938	1184.99	299	3314	5424887	436.264	11.0836	0	µm	488		65641.1
B5 003.nd2	23655.9	6729.77	-263.9	1225.7	2	58.443	840.185	390	2168	4058095	227.376	5.55897	0	µm	488		49102.9
B5 003.nd2	23655.9	6729.77	-263.9	1225.7	3	83.1754	1247.72	374	4095	8576825	430.291	9.77327	0	µm	488		103780
B5 003.nd2	23655.9	6729.77	-263.9	1225.7	4	65.6909	674.861	354	2049	3663819	187.173	5.78814	0	µm	488		44332.2
B5 003.nd2	23655.9	6729.77	-263.9	1225.7	5	48.7993	1248.42	529	3121	5034859	373.378	5.89981	0	µm	488		60921.8
B5 003.nd2	23655.9	6729.77	-263.9	1225.7	6	52.9133	1309.84	616	4095	5727934	439.464	6.5	0	µm	488		69308
B5 003.nd2	23655.9	6729.77	-263.9	1225.7	7	24.7324	1175.5	398	3645	2402727	532.235	9.15829	0	µm	488		29073
B5 003.nd2	23655.9	6729.77	-263.9	1225.7	8	77.8635	852.884	326	3043	5488309	289.538	9.33436	0	µm	488		66408.5
B5 003.nd2	23655.9	6729.77	-263.9	1225.7	9	71.3537	1061.4	345	3585	6259101	379.223	10.3913	0	µm	488		75735.1
B5 003.nd2	23655.9	6729.77	-263.9	1225.7	10	79.8358	1243.65	317	4095	8205627	441.485	12.2239	0	µm	488		99288.1
B5 003.nd2	23655.9	6729.77	-263.9	1225.7	11	54.5468	1153.74	536	3430	5201049	405.425	6.28205	0	µm	488		62932.7
B5 003.nd2	25831.9	6731.9	343.3	1516.2	1	45.98	1123.12	494	3093	4267873	399.546	6.26113	0	µm	488		51641.3
B5 003.nd2	25831.9	6731.9	343.3	1516.2	2	99.2321	1024.62	422	3273	8402890	267.292	7.57639	0	µm	488		101675
B5 003.nd2	25831.9	6731.9	343.3	1516.2	3	51.2919	989.781	412	2361	4195683	308.465	5.73058	0	µm	488		50767.8
B5 003.nd2	25831.9	6731.9	343.3	1516.2	4	36.3242	1472.13	547	4052	4419342	438.467	7.40768	0	µm	488		53474
B5 003.nd2	25831.9	6731.9	343.3	1516.2	5	92.0205	1004.9	344	3295	7642292	381.593	9.57849	0	µm	488		92471.7
B5 003.nd2	25831.9	6731.9	343.3	1516.2	6	61.952	1294.1	434	3343	6625772	480.456	7.70277	0	µm	488		80171.8
B5 003.nd2	25831.9	6731.9	343.3	1516.2	7	35.8402	1203.25	465	3080	3564037	369.548	6.62366	0	µm	488		43124.8
B5 003.nd2	25831.9	6731.9	343.3	1516.2	8	62.0609	823.192	341	2338	4222154	297.721	6.56742	0	µm	488		51088.1
B5 003.nd2	25831.9	6731.9	343.3	1516.2	9	61.71	1281.3	508	4063	6534612	472.744	6.34055	0	µm	488		79068.8
B5 003.nd2	25831.9	6731.9	343.3	1516.2	10	71.4142	1221.79	479	2806	7211019	388.358	5.85804	0	µm	488		87253.3
B5 003.nd2	25831.9	6731.9	343.3	1516.2	11	35.8523	894.995	468	2831	2651869	257.298	6.04915	0	µm	488		32087.6
B5 009.nd2	1942.44	6734.06	264.4	2971.2	1	48.2306	770.745	384	1518	3072191	210.678	3.95312	0	µm	488		37173.5
B5 009.nd2	1942.44	6734.06	264.4	2971.2	2	63.0773	930.938	453	1952	4852980	232.255	4.30905	0	µm	488		58721.1
B5 009.nd2	1942.44	6734.06	264.4	2971.2	3	48.5573	780.025	325	2375	3130242	256.409	7.30769	0	µm	488		37875.9
B5 009.nd2	1942.44	6734.06	264.4	2971.2	4	122.331	923.543	407	3018	9337023	264.113	6.85909	0	µm	488		112978
B5 009.nd2	1942.44	6734.06	264.4	2971.2	5	73.3865	990.073	485	2248	6004791	228.364	4.55061	0	µm	488		72658
B5 009.nd2	1942.44	6734.06	264.4	2971.2	6	45.4113	763.336	396	1841	2864801	233.43	4.64899	0	µm	488		34664.1
B5 009.nd2	1942.44	6734.06	264.4	2971.2	7	42.3016	940.753	464	1876	3288872	195.747	3.91595	0	µm	488		39795.4
B5 009.nd2	1942.44	6734.06	264.4	2971.2	8	68.7159	943.105	437	3598	5355894	296.686	6.42334	0	µm	488		64806.3
B5 009.nd2	1942.44	6734.06	264.4	2971.2	9	34.5818	757.311	404	1556	2164394	168.979	3.85148	0	µm	488		26189.2
B5 008.nd2	321.602	6733.09	445.8	2844.4	1	95.106	1263.78	393	2771	9933311	320.574	6.67685	0	µm	488		120193
B5 008.nd2	321.602	6733.09	445.8	2844.4	2	47.2021	1439.28	650	3413	5614650	457.703	5.25077	0	µm	488		67937.3
B5 008.nd2	321.602	6733.09	445.8	2844.4	3	79.0614	1081.9	384	2610	7069157	360.107	6.64062	0	µm	488		85536.8
B5 008.nd2	321.602	6733.09	445.8	2844.4	4	49.0655	1136.62	427	2365	4608990	389.5	5.53864	0	µm	488		55768.8
B5 008.nd2	321.602	6733.09	445.8	2844.4	5	37.3648	1424.06	506	4095	4397501	619.064	8.09289	0	µm	488		53209.8
B5 008.nd2	321.602	6733.09	445.8	2844.4	6	51.6791	1414.1	663	4095	6039604	385.409	6.17647	0	µm	488		73079.2
B5 008.nd2	321.602	6733.09	445.8	2844.4	7	56.0351	992.047	515	2331	4594171	248.846	4.52621	0	µm	488		55589.5
B5 008.nd2	321.602	6733.09	445.8	2844.4	8	53.0827	1026.74	483	3490	4504300	324.907	7.13701	0	µm	488		54502
B5 008.nd2	321.602	6733.09	445.8	2844.4	9	21.8768	1141.52	516	2247	2063864	245.27	4.35465	0	µm	488		24972.8
B5 008.nd2	321.602	6733.09	445.8	2844.4	10	39.6154	1095.12	451	2512	3585418	296.939	5.56984	0	µm	488		43383.6
B5 008.nd2	321.602	6733.09	445.8	2844.4	11	61.8673	1102.54	578	3749	5637284	329.471	6.48616	0	µm	488		68211.1
B5 008.nd2	321.602	6733.09	445.8	2844.4	12	82.28	921.158	495	2329	6263877	255.662	4.70505	0	µm	488		75792.9
B5 007.nd2	292.465	6732.82	352.2	2724	1	48.5694	823.36	404	1646	3304966	228.29	4.00487	0	µm	488		39990.1
B5 007.nd2	292.465	6732.82	352.2	2724	2	60.8872	1256.09	320	4095	6320641	592.289	12.7969	0	µm	488		76479.8
B5 007.nd2	292.465	6732.82	352.2	2724	3	88.4389	887.164	298	1983	6484282	253.354	6.55034	0	µm	488		78459.8
B5 007.nd2	292.465	6732.82	352.2	2724	4	49.6221	919.298	478	1858	3770043	228.879	3.78411	0	µm	488		45617.5
B5 007.nd2	292.465	6732.82	352.2	2724	5	78.7105	846.321	398	2155	5505315	225.706	5.20531	0	µm	488		66614.3
B5 007.nd2	292.465	6732.82	352.2	2724	6	67.9294	1045.07	466	2620	5867004	259.995	5.62232	0	µm	488		70990.7
B5 007.nd2	292.465	6732.82	352.2	2724	7	93.775	1042.8	462	2904	8081733	318.333	6.28571	0	µm	488		97789
B5 007.nd2	292.465	6732.82	352.2	2724	8	55.5753	1036.51	340	3828	4760673	334.532	11.2588	0	µm	488		57604.1
B5 007.nd2	292.465	6732.82	352.2	2724	9	38.6837	969.439	474	2310	3099295	291.136	4.75309	0	µm	488		37501.5
B5 006.nd2	289.943	6731.68	269	2547.5	1	108.428	1055.72	389	3221	9460319	314.047	7.6327	0	µm	488		114470
B5 006.nd2	289.943	6731.68	269	2547.5	2	60.4274	858.503	404	1791	4287366	219.554	4.43317	0	µm	488		51877.1
B5 006.nd2	289.943	6731.68	269	2547.5	3	41.3215	1037.93	339	2786	3544534	346.309	7.91477	0	µm	488		42888.9
B5 006.nd2	289.943	6731.68	269	2547.5	4	26.8862	687.757	300	2381	1528197	260.655	7.93667	0	µm	488		18491.2
B5 006.nd2	289.943	6731.68	269	2547.5	5	93.0611	866.424	429	3164	6663670	201.767	6.71762	0	µm	488		80630.4
B5 006.nd2	289.943	6731.68	269	2547.5	6	42.6162	598.66	310	1634	2108481	218.505	5.27097	0	µm	488		25512.6
B5 006.nd2	289.943	6731.68	269	2547.5	7	80.6465	825.465	240	1753	5501724	239.022	7.30417	0	µm	488		66570.9
B5 006.nd2	289.943	6731.68	269	2547.5	8	37.2559	1082.55	451	2730	3333157	374.158	5.59426	0	µm	488		40331.2
B5 006.nd2	289.943	6731.68	269	2547.5	9	30.9639	750.774	474	1505	1921230	149.237	3.1751	0	µm	488		23246.9
B5 006.nd2	289.943	6731.68	269	2547.5	10	60.1249	970.149	385	3920	4820671	315.824	10.1818	0	µm	488		58330.1
B5 006.nd2	289.943	6731.68	269	2547.5	11	64.3841	1159.77	397	3159	6171158	379.825	7.95718	0	µm	488		74671
B5 006.nd2	289.943	6731.68	269	2547.5	12	51.3161	1262.25	449	3559	5353197	393.338	7.9265	0	µm	488		64773.7
B5 006.nd2	289.943	6731.68	269	2547.5	13	85.8979	1000.83	456	4095	7104878	348.815	8.98026	0	µm	488		85969
B5 006.nd2	289.943	6731.68	269	2547.5	14	98.857	989.834	306	4095	8086947	337.138	12.757	0	µm	488		97852.1
B5 006.nd2	289.943	6731.68	269	2547.5	15	54.6194	820.784	401	2681	3705021	237.82	6.68579	0	µm	488		44830.8
B5 005.nd2	311.425	6730.15	270.3	1710.5	1	60.6694	1170.67	481	2506	5869751	352.024	5.20998	0	µm	488		71024
B5 005.nd2	311.425	6730.15	270.3	1710.5	2	66.308	1565.67	398	3563	8579890	542.712	8.95226	0	µm	488		103817
B5 005.nd2	311.425	6730.15	270.3	1710.5	3	41.6482	1245.17	491	3086	4285889	469.872	6.28513	0	µm	488		51859.3
B5 005.nd2	311.425	6730.15	270.3	1710.5	4	56.7732	1476.48	406	4095	6927662	493.142	10.0862	0	µm	488		83824.7
B5 005.nd2	311.425	6730.15	270.3	1710.5	5	62.0125	1288.76	502	3881	6604876	486.169	7.47784	0	µm	488		79919
																	72123.1
