# Supplementary material for: Aurora kinase A promotes trained immunity via regulation of endogenous S-adenosylmethionine metabolism
Source: eLife journal article supplement (doi:10.7554/elife.104138), 2025-01-08
Supplement: fig6-data1 [file elife-104138-fig6-data1-v1.zip]

## Sheet: ROI Statistics
FileName	Time (ms)	Z Pos	X Pos	Y Pos	ROI ID	ROI Area [µm²]	ROI Mean Intensity	ROI Min Intensity	ROI Max Intensity	ROI Sum Intensity	ROI StDev Intensity	ROI Signal/Background	Area Fraction	Unit	Channel
A5 001.nd2	260.311	6757.09	9784.5	106	1	66.9493	1550.69	556	4095	8579979	588.945	7.36511	0	µm	488		103818
A5 001.nd2	260.311	6757.09	9784.5	106	2	53.4215	1906.62	737	4095	8417715	706.536	5.2907	0	µm	488		101854
A5 001.nd2	260.311	6757.09	9784.5	106	3	72.8057	1412.89	267	3149	8501348	469.147	11.794	0	µm	488		102866
A5 001.nd2	260.311	6757.09	9784.5	106	4	80.5739	1993.48	285	4095	13274573	687.752	14.3684	0	µm	488		160622
A5 001.nd2	260.311	6757.09	9784.5	106	5	60.016	1757.36	642	3772	8716491	542.562	5.50657	0	µm	488		105470
A5 001.nd2	260.311	6757.09	9784.5	106	6	38.841	1389.81	547	3211	4461281	501.482	5.8702	0	µm	488		53981.5
A5 001.nd2	260.311	6757.09	9784.5	106	7	96.4612	1282.37	403	3223	10223050	444.216	7.46065	0	µm	488		123699
A5 001.nd2	260.311	6757.09	9784.5	106	8	36.7114	1218.25	384	3254	3696166	332.642	8.47396	0	µm	488		44723.6
A5 001.nd2	260.311	6757.09	9784.5	106	9	69.4298	1814.18	808	4095	10409786	589.273	5.06807	0	µm	488		125958
A5 001.nd2	260.311	6757.09	9784.5	106	10	74.657	1899.1	728	4095	11717450	616.054	5.625	0	µm	488		141781
A5 001.nd2	260.311	6757.09	9784.5	106	11	52.1389	1165.47	403	4095	5021995	516.717	10.1613	0	µm	488		60766.1
A5 002.nd2	1941.95	6757.26	9991.2	150.9	1	228	1635.4	484	4095	30815903	547.166	7.875	0	µm	488		372872
A5 002.nd2	1941.95	6757.26	9991.2	150.9	2	72.2249	1281.96	484	2716	7651992	400.59	5.61157	0	µm	488		92589.1
A5 002.nd2	1941.95	6757.26	9991.2	150.9	3	169.642	1369.81	543	3729	19204757	440.819	6.29899	0	µm	488		232378
A5 002.nd2	1941.95	6757.26	9991.2	150.9	4	95.2391	1401.51	535	4095	11031321	461.214	7.63992	0	µm	488		133479
A5 002.nd2	1941.95	6757.26	9991.2	150.9	5	24.7082	1003.23	324	2532	2048600	422.149	7.81482	0	µm	488		24788.1
A5 002.nd2	1941.95	6757.26	9991.2	150.9	6	55.418	1317.84	626	4095	6035711	361.857	6.54153	0	µm	488		73032.1
A5 002.nd2	1941.95	6757.26	9991.2	150.9	7	60.4516	1239.7	494	3041	6193562	366.689	6.15587	0	µm	488		74942.1
A5 002.nd2	1941.95	6757.26	9991.2	150.9	8	57.959	1238.01	359	4095	5930052	461.235	11.4067	0	µm	488		71753.6
A5 002.nd2	1941.95	6757.26	9991.2	150.9	9	62.5328	1334.15	591	3996	6894885	382.022	6.76142	0	µm	488		83428.1
A5 002.nd2	1941.95	6757.26	9991.2	150.9	10	38.4417	819.719	406	2688	2604247	258.57	6.62069	0	µm	488		31511.4
A5 002.nd2	1941.95	6757.26	9991.2	150.9	11	50.5659	1012.63	372	3131	4231767	379.82	8.41667	0	µm	488		51204.4
A5 002.nd2	1941.95	6757.26	9991.2	150.9	12	49.368	814.656	410	2781	3323796	248.802	6.78293	0	µm	488		40217.9
A5 002.nd2	1941.95	6757.26	9991.2	150.9	13	57.0273	982.962	492	3206	4632700	305.528	6.20116	0	µm	488		56055.7
A5 002.nd2	1941.95	6757.26	9991.2	150.9	14	31.2301	1232.54	574	4095	3181196	415.844	7.13415	0	µm	488		38492.5
A5 002.nd2	1941.95	6757.26	9991.2	150.9	15	40.4019	1021.23	493	2580	3409891	328.899	5.23327	0	µm	488		41259.7
A5 002.nd2	3951.13	6756.33	10129.2	-44	1	92.9764	1399.45	178	3504	10753404	529.253	18.4421	0	µm	488		130116
A5 002.nd2	3951.13	6756.33	10129.2	-44	2	136.645	1314.67	457	3592	14846542	418.038	6.59737	0	µm	488		179643
A5 002.nd2	3951.13	6756.33	10129.2	-44	3	66.0539	1258.48	259	4095	6870053	635.907	15.8108	0	µm	488		83127.6
A5 002.nd2	3951.13	6756.33	10129.2	-44	4	123.517	1211.35	493	3348	12365502	335.43	5.71331	0	µm	488		149623
A5 002.nd2	3951.13	6756.33	10129.2	-44	5	91.8511	1300.81	326	4095	9874447	579.509	11.6006	0	µm	488		119481
A5 002.nd2	3951.13	6756.33	10129.2	-44	6	110.945	1749.45	433	4095	16040728	709.948	7.8	0	µm	488		194093
A5 002.nd2	3951.13	6756.33	10129.2	-44	8	153.005	1173.72	458	4095	14841628	398.589	8.30629	0	µm	488		179584
A5 002.nd2	3951.13	6756.33	10129.2	-44	9	74.3303	1210.79	456	3777	7437887	470.498	8.28289	0	µm	488		89998.4
A5 002.nd2	3951.13	6756.33	10129.2	-44	10	104.58	1250.32	469	4095	10806525	416.431	7.90541	0	µm	488		130759
A5 002.nd2	3951.13	6756.33	10129.2	-44	11	53.3973	1126.18	441	3454	4969834	365.05	7.8322	0	µm	488		60135
A5 002.nd2	3951.13	6756.33	10129.2	-44	12	84.9783	974.915	400	2496	6846828	332.45	5.97129	0	µm	488		82846.6
A5 002.nd2	3951.13	6756.33	10129.2	-44	13	75.5766	1219.39	536	3998	7616281	395.979	7.45895	0	µm	488		92157
A5 002.nd2	3951.13	6756.33	10129.2	-44	14	99.9339	1490.01	689	3547	12305969	383.695	5.14804	0	µm	488		148902
A5 002.nd2	3951.13	6756.33	10129.2	-44	15	83.732	1209.45	333	3825	8369375	340.354	9.16517	0	µm	488		101269
A5 002.nd2	6139.66	6756.91	10147.3	461.6	1	172.57	941.61	379	2509	13429236	279.932	6.62005	0	µm	488		162494
A5 002.nd2	6139.66	6756.91	10147.3	461.6	2	38.7684	1262.28	556	3657	4044337	342.346	6.57734	0	µm	488		48936.5
A5 002.nd2	6139.66	6756.91	10147.3	461.6	3	75.7218	596.234	307	1632	3731235	155.828	5.31596	0	µm	488		45147.9
A5 002.nd2	6139.66	6756.91	10147.3	461.6	4	67.881	1084.29	442	2871	6082886	364.464	6.49547	0	µm	488		73602.9
A5 002.nd2	6139.66	6756.91	10147.3	461.6	5	87.7613	742.356	296	1941	5384311	206.509	6.55743	0	µm	488		65150.2
A5 002.nd2	6139.66	6756.91	10147.3	461.6	6	66.9251	765.815	401	1883	4235725	211.51	4.69576	0	µm	488		51252.3
A5 002.nd2	8392.61	6755.51	10156.8	1287.6	1	19.6625	1533.29	747	4095	2491594	470.614	5.48193	0	µm	488		30148.3
A5 002.nd2	8392.61	6755.51	10156.8	1287.6	2	19.9045	1573.01	681	4095	2587605	582.614	6.01322	0	µm	488		31310
A5 002.nd2	8392.61	6755.51	10156.8	1287.6	3	43.3059	1062.28	482	4095	3801896	291.092	8.49585	0	µm	488		46002.9
A5 002.nd2	8392.61	6755.51	10156.8	1287.6	4	36.9655	1423.74	358	4095	4349536	678.81	11.4385	0	µm	488		52629.4
A5 002.nd2	8392.61	6755.51	10156.8	1287.6	5	63.1378	1721.12	813	4095	8980803	488.052	5.0369	0	µm	488		108668
A5 002.nd2	8392.61	6755.51	10156.8	1287.6	6	18.2589	1713.59	915	4095	2585801	680.083	4.47541	0	µm	488		31288.2
A5 003.nd2	366.826	6755.22	10493.3	1191	1	84.5548	810.74	329	1791	5665448	282.105	5.44377	0	µm	488		68551.9
A5 003.nd2	366.826	6755.22	10493.3	1191	2	72.237	550.813	261	2128	3288351	170.903	7.5461	0	µm	488		39789
A5 003.nd2	366.826	6755.22	10493.3	1191	3	113.909	759.753	231	3165	7152312	292.818	12.1731	0	µm	488		86543
A5 003.nd2	366.826	6755.22	10493.3	1191	4	74.7054	694.305	355	1334	4286639	153.788	3.75775	0	µm	488		51868.3
A5 003.nd2	366.826	6755.22	10493.3	1191	5	81.9049	725.267	240	3291	4909329	282.457	13.7125	0	µm	488		59402.9
A5 003.nd2	366.826	6755.22	10493.3	1191	6	88.1727	909.504	308	4095	6627557	349.734	12.3716	0	µm	488		80193.4
A5 003.nd2	366.826	6755.22	10493.3	1191	7	40.8012	769.391	367	1756	2594386	199.758	4.78474	0	µm	488		31392.1
A5 003.nd2	366.826	6755.22	10493.3	1191	8	86.8901	908.28	165	3174	6522360	320.153	19.2364	0	µm	488		78920.6
A5 004.nd2	3999.15	6754.69	10278.1	213.6	1	81.5419	1114.49	343	4095	7510527	477.715	11.9388	0	µm	488		90877.4
A5 004.nd2	3999.15	6754.69	10278.1	213.6	2	74.7538	1104.64	292	4095	6824467	478.793	14.024	0	µm	488		82576.1
A5 004.nd2	3999.15	6754.69	10278.1	213.6	3	52.6229	1140.7	426	2589	4960884	326.046	6.07747	0	µm	488		60026.7
A5 004.nd2	3999.15	6754.69	10278.1	213.6	4	61.4801	976.585	287	2842	4962027	349.563	9.90244	0	µm	488		60040.5
A5 004.nd2	3999.15	6754.69	10278.1	213.6	5	85.2687	1110.74	454	3586	7827411	410.351	7.89868	0	µm	488		94711.7
A5 004.nd2	3999.15	6754.69	10278.1	213.6	6	28.6528	1209.83	412	3007	2864888	475.536	7.29854	0	µm	488		34665.1
A5 004.nd2	3999.15	6754.69	10278.1	213.6	7	64.0332	1496.18	516	4095	7917760	497.669	7.93605	0	µm	488		95804.9
A5 004.nd2	3999.15	6754.69	10278.1	213.6	8	63.7912	921.679	418	2351	4859093	302.537	5.6244	0	µm	488		58795
A5 004.nd2	3999.15	6754.69	10278.1	213.6	9	51.2072	1204.96	483	2876	5099384	390.838	5.78672	0	µm	488		61702.5
A5 004.nd2	3999.15	6754.69	10278.1	213.6	10	34.0373	1181.77	489	3351	3324332	358.634	6.85276	0	µm	488		40224.4
A5 004.nd2	3999.15	6754.69	10278.1	213.6	11	38.0666	1059.44	506	2369	3333012	263.843	4.68182	0	µm	488		40329.4
A5 004.nd2	3999.15	6754.69	10278.1	213.6	12	32.4885	1129.16	556	4052	3031786	396.973	7.28777	0	µm	488		36684.6
A5 004.nd2	3999.15	6754.69	10278.1	213.6	13	92.3472	1089.41	470	3231	8314390	394.524	6.54049	0	µm	488		100604
A5 004.nd2	3999.15	6754.69	10278.1	213.6	14	54.7162	1230.93	494	3649	5566252	420.629	7.38664	0	µm	488		67351.6
A5 004.nd2	3999.15	6754.69	10278.1	213.6	15	75.6492	1344.81	409	3242	8407733	419.903	7.92665	0	µm	488		101734
A5 004.nd2	3999.15	6754.69	10278.1	213.6	16	75.0079	967.717	412	4095	5998876	467.834	9.93932	0	µm	488		72586.4
A5 004.nd2	3999.15	6754.69	10278.1	213.6	17	57.354	1307.34	518	3563	6196773	461.527	6.87838	0	µm	488		74981
A5 004.nd2	3999.15	6754.69	10278.1	213.6	18	35.4409	1134.95	503	2615	3324259	370.111	5.19881	0	µm	488		40223.5
A5 004.nd2	3999.15	6754.69	10278.1	213.6	19	60.9235	1410.83	505	4095	7103551	625.662	8.10891	0	µm	488		85953
A5 004.nd2	1972.06	6754.26	10033.8	236.7	1	131.817	895.264	388	3024	9753011	271.699	6.23786	0	µm	488		118011
A5 004.nd2	1972.06	6754.26	10033.8	236.7	2	83.8288	970.685	457	2535	6724903	301.153	5.54705	0	µm	488		81371.3
A5 004.nd2	1972.06	6754.26	10033.8	236.7	3	110.146	898.383	184	2274	8177977	249.376	11.7216	0	µm	488		98953.5
A5 004.nd2	1972.06	6754.26	10033.8	236.7	4	55.0187	1067.32	444	3641	4853086	558.781	8.20045	0	µm	488		58722.3
A5 004.nd2	1972.06	6754.26	10033.8	236.7	5	152.109	1112.97	434	3074	13991091	349.6	6.63931	0	µm	488		169292
A5 004.nd2	1972.06	6754.26	10033.8	236.7	6	63.5492	1211.95	458	2755	6365157	381.822	6.01528	0	µm	488		77018.4
A5 004.nd2	1972.06	6754.26	10033.8	236.7	7	55.5874	956.537	457	2551	4394330	291.118	5.58206	0	µm	488		53171.4
A5 004.nd2	1972.06	6754.26	10033.8	236.7	8	71.5715	878.786	464	1766	5198019	216.721	3.80603	0	µm	488		62896
A5 004.nd2	1972.06	6754.26	10033.8	236.7	9	61.9278	1257.05	574	2682	6433569	300.072	4.67247	0	µm	488		77846.2
A5 004.nd2	1972.06	6754.26	10033.8	236.7	10	151.528	952.299	361	2801	11925643	266.68	6.15366	0	µm	488		144300
A5 004.nd2	1972.06	6754.26	10033.8	236.7	11	131.43	1288.35	422	4095	13994005	470.714	9.1	0	µm	488		169327
A5 004.nd2	1972.06	6754.26	10033.8	236.7	12	51.5581	1167.67	404	2729	4975460	391.416	6.75495	0	µm	488		60203.1
A5 004.nd2	1972.06	6754.26	10033.8	236.7	13	70.5551	1446.72	585	3165	8435823	434.413	5.41026	0	µm	488		102073
A5 004.nd2	1972.06	6754.26	10033.8	236.7	14	57.8259	1165.23	437	2727	5568639	340.314	6.24027	0	µm	488		67380.5
A5 004.nd2	6039.81	6753.27	10391.4	160.7	1	90.4717	1365.34	400	3675	10208649	461.319	8.46774	0	µm	488		123525
A5 004.nd2	6039.81	6753.27	10391.4	160.7	2	73.4833	1286.64	387	3436	7813789	497.028	8.87855	0	µm	488		94546.8
A5 004.nd2	6039.81	6753.27	10391.4	160.7	3	28.3503	1087.92	426	2612	2548996	349.125	6.13145	0	µm	488		30842.9
A5 004.nd2	6039.81	6753.27	10391.4	160.7	4	35.574	956.594	504	1865	2812385	215.322	3.7004	0	µm	488		34029.9
A5 004.nd2	6039.81	6753.27	10391.4	160.7	5	94.9124	1112.96	515	3267	8730082	331.16	6.34369	0	µm	488		105634
A5 004.nd2	6039.81	6753.27	10391.4	160.7	6	63.3435	1181.6	401	3996	6185678	397.286	9.96509	0	µm	488		74846.7
A5 004.nd2	6039.81	6753.27	10391.4	160.7	7	60.2822	1401.37	488	2743	6981621	385.347	5.6209	0	µm	488		84477.6
A5 004.nd2	6039.81	6753.27	10391.4	160.7	8	84.7	1106.28	538	2439	7743976	246.563	4.45073	0	µm	488		93702.1
A5 004.nd2	6039.81	6753.27	10391.4	160.7	9	28.6286	1054.16	570	1920	2494136	211.488	3.36842	0	µm	488		30179
A5 004.nd2	6039.81	6753.27	10391.4	160.7	10	67.5543	1393.52	529	3894	7780001	504.273	7.36106	0	µm	488		94138
A5 004.nd2	6039.81	6753.27	10391.4	160.7	11	36.9413	1193.47	449	2847	3643649	391.679	6.34076	0	µm	488		44088.2
A5 004.nd2	6039.81	6753.27	10391.4	160.7	12	57.2693	1544.38	597	4095	7309571	502.4	6.8593	0	µm	488		88445.8
A5 004.nd2	8186.09	6752.7	10836.5	173.3	1	59.6046	1195.45	327	3816	5888782	431.163	11.6697	0	µm	488		71254.3
A5 004.nd2	8186.09	6752.7	10836.5	173.3	2	67.2034	1138	314	2816	6320441	365.024	8.96815	0	µm	488		76477.3
A5 004.nd2	8186.09	6752.7	10836.5	173.3	3	71.3658	1086.18	326	2984	6406315	369.582	9.15337	0	µm	488		77516.4
A5 004.nd2	8186.09	6752.7	10836.5	173.3	4	77.9119	1313.73	280	4095	8459138	528.969	14.024	0	µm	488		102356
A5 004.nd2	8186.09	6752.7	10836.5	173.3	5	73.5317	851.234	395	2313	5172952	317.393	4.83254	0	µm	488		62592.7
A5 004.nd2	8186.09	6752.7	10836.5	173.3	6	22.4334	1136.76	545	3287	2107561	318.736	6.03119	0	µm	488		25501.5
A5 004.nd2	8186.09	6752.7	10836.5	173.3	7	68.0988	1107.93	383	4095	6235408	617.329	10.6919	0	µm	488		75448.4
A5 004.nd2	8186.09	6752.7	10836.5	173.3	8	73.0235	1089.64	377	3197	6575973	400.879	8.48011	0	µm	488		79569.3
A5 004.nd2	8186.09	6752.7	10836.5	173.3	9	35.4409	1114.17	377	2772	3263398	378.856	7.35278	0	µm	488		39487.1
A5 004.nd2	8186.09	6752.7	10836.5	173.3	10	89.8425	1147.05	379	3504	8516880	494.27	9.24538	0	µm	488		103054
A5 004.nd2	8186.09	6752.7	10836.5	173.3	11	28.5923	1224.27	449	2966	2892957	393.799	6.60579	0	µm	488		35004.8
A5 004.nd2	8186.09	6752.7	10836.5	173.3	12	39.2282	1309.92	581	3545	4246746	440.518	6.10155	0	µm	488		51385.6
A5 004.nd2	8186.09	6752.7	10836.5	173.3	13	68.4376	1155.45	297	3311	6535241	395.907	11.1481	0	µm	488		79076.4
A5 004.nd2	8186.09	6752.7	10836.5	173.3	14	112.482	1036.3	330	3151	9633435	378.639	8.87606	0	µm	488		116565
A5 004.nd2	8186.09	6752.7	10836.5	173.3	15	48.9929	1040.86	432	2316	4214452	293.525	5.36111	0	µm	488		50994.9
A5 004.nd2	8186.09	6752.7	10836.5	173.3	16	35.5982	901.232	410	2664	2651424	254.966	6.49756	0	µm	488		32082.2
A5 004.nd2	8186.09	6752.7	10836.5	173.3	17	37.631	1385.72	499	3377	4309601	471.057	6.76753	0	µm	488		52146.2
A5 004.nd2	10264.1	6752.22	11085.3	227.9	1	57.4992	1035.27	341	2881	4919588	356.683	8.44868	0	µm	488		59527
A5 004.nd2	10264.1	6752.22	11085.3	227.9	2	77.4158	1372.7	442	3748	8782533	411.224	8.47964	0	µm	488		106269
A5 004.nd2	10264.1	6752.22	11085.3	227.9	3	19.3116	1873.09	472	4095	2989447	675.418	8.67585	0	µm	488		36172.3
A5 004.nd2	10264.1	6752.22	11085.3	227.9	4	57.0757	1312.03	399	4095	6188823	436.554	10.2632	0	µm	488		74884.8
A5 004.nd2	10264.1	6752.22	11085.3	227.9	5	50.215	1289.7	463	3954	5352238	421.294	8.53996	0	µm	488		64762.1
A5 004.nd2	10264.1	6752.22	11085.3	227.9	6	107.424	1242.18	429	4095	11028058	498.626	9.1	0	µm	488		133440
A5 004.nd2	10264.1	6752.22	11085.3	227.9	7	26.4264	859.444	337	2065	1877025	296.138	6.1276	0	µm	488		22712
A5 004.nd2	10264.1	6752.22	11085.3	227.9	8	24.5751	1225.63	294	2771	2489261	359.549	9.42517	0	µm	488		30120.1
A5 004.nd2	10264.1	6752.22	11085.3	227.9	9	49.5495	1022.01	470	2718	4185115	277.873	5.78298	0	µm	488		50639.9
A5 004.nd2	10264.1	6752.22	11085.3	227.9	10	21.0903	1263.8	626	4085	2202811	352.069	6.52556	0	µm	488		26654
A5 004.nd2	12305.8	6751.41	10881.3	470.8	1	120.189	1140.87	453	3390	11332258	400.359	7.48344	0	µm	488		137120
A5 004.nd2	12305.8	6751.41	10881.3	470.8	2	28.9795	1078.9	413	2380	2583971	372.037	5.76271	0	µm	488		31266
A5 004.nd2	12305.8	6751.41	10881.3	470.8	3	88.1848	1035.26	253	3353	7544988	424.086	13.253	0	µm	488		91294.4
A5 004.nd2	12305.8	6751.41	10881.3	470.8	4	76.1695	1327.85	353	3066	8358786	403.104	8.68555	0	µm	488		101141
A5 004.nd2	12305.8	6751.41	10881.3	470.8	5	78.8073	1242.01	354	3193	8089233	474.78	8.4435	0	µm	488		97879.7
A5 004.nd2	12305.8	6751.41	10881.3	470.8	6	50.578	2233.88	842	4095	9337624	689.069	4.86342	0	µm	488		112985
A5 004.nd2	12305.8	6751.41	10881.3	470.8	7	40.4987	2401.82	310	4095	8038882	793.229	11.9041	0	µm	488		97270.5
A5 004.nd2	12305.8	6751.41	10881.3	470.8	8	21.296	1299.65	549	3138	2287383	429.303	5.71585	0	µm	488		27677.3
A5 004.nd2	12305.8	6751.41	10881.3	470.8	9	16.6012	1592.15	653	3342	2184425	586.883	5.11792	0	µm	488		26431.5
A5 004.nd2	12305.8	6751.41	10881.3	470.8	10	85.3413	1352.91	276	4095	9542071	574.622	14.837	0	µm	488		115459
A5 004.nd2	12305.8	6751.41	10881.3	470.8	11	67.8931	1058.83	264	2623	5941100	343.91	9.93561	0	µm	488		71887.3
A5 004.nd2	12305.8	6751.41	10881.3	470.8	12	32.1981	1418.1	539	3759	3773560	379.995	6.97403	0	µm	488		45660.1
A5 004.nd2	14398.2	6750.84	10669	566.6	1	47.4441	1308.4	397	2931	5130234	470.038	7.38287	0	µm	488		62075.8
A5 004.nd2	14398.2	6750.84	10669	566.6	2	35.1868	1539.51	688	3207	4476897	428.4	4.66134	0	µm	488		54170.5
A5 004.nd2	14398.2	6750.84	10669	566.6	3	70.664	1112.3	394	2470	6495819	378.997	6.26904	0	µm	488		78599.4
A5 004.nd2	14398.2	6750.84	10669	566.6	4	56.0835	983.339	389	2370	4557774	365.07	5.86634	0	µm	488		55149.1
A5 004.nd2	16515.5	6751.59	10437.5	432.2	1	52.6713	1119.88	413	3218	4874833	297.663	7.73558	0	µm	488		58985.5
A5 004.nd2	16515.5	6751.59	10437.5	432.2	2	27.4307	1803.59	786	3760	4088736	459.688	4.78371	0	µm	488		49473.7
A5 004.nd2	16515.5	6751.59	10437.5	432.2	3	40.1962	1326.24	342	2326	4405762	401.578	6.80117	0	µm	488		53309.7
A5 004.nd2	16515.5	6751.59	10437.5	432.2	4	53.482	1094.84	416	4095	4839176	433.481	9.14062	0	µm	488		58554
A5 004.nd2	16515.5	6751.59	10437.5	432.2	5	43.4511	865.397	362	2445	3107639	307.272	6.75414	0	µm	488		37602.4
A5 004.nd2	16515.5	6751.59	10437.5	432.2	6	20.6789	1116.15	487	2580	1907503	315.003	5.29774	0	µm	488		23080.8
A5 004.nd2	16515.5	6751.59	10437.5	432.2	7	43.197	1475.16	479	3713	5266304	396.633	6.9666	0	µm	488		63722.3
A5 004.nd2	16515.5	6751.59	10437.5	432.2	8	31.8593	1354.08	472	4095	3565295	506.813	8.67585	0	µm	488		43140.1
A5 004.nd2	16515.5	6751.59	10437.5	432.2	9	51.6549	1261.03	454	3459	5383358	463.929	7.61894	0	µm	488		65138.6
A5 004.nd2	16515.5	6751.59	10437.5	432.2	10	23.111	1315.74	479	3930	2513071	590.997	8.20459	0	µm	488		30408.2
A5 005.nd2	2817.24	6752.34	10281.5	527.8	1	74.3908	1423.07	577	4038	8749055	448.374	6.99827	0	µm	488		105864
A5 005.nd2	2817.24	6752.34	10281.5	527.8	2	56.3739	1111.61	353	2175	5178974	267.239	6.16147	0	µm	488		62665.6
A5 005.nd2	2817.24	6752.34	10281.5	527.8	3	81.0821	826.504	321	2499	5538402	246.65	6.50781	0	µm	488		67014.7
A5 005.nd2	2817.24	6752.34	10281.5	527.8	4	48.9687	1421.56	490	4095	5753073	489.392	8.06102	0	µm	488		69612.2
A5 005.nd2	2817.24	6752.34	10281.5	527.8	5	36.2274	1013.36	486	1879	3034013	211.047	3.86626	0	µm	488		36711.6
A5 005.nd2	2817.24	6752.34	10281.5	527.8	6	76.9802	1231.31	486	3289	7833607	392.825	6.26476	0	µm	488		94786.6
A5 005.nd2	2817.24	6752.34	10281.5	527.8	7	62.1819	1549.56	615	3987	7963200	471.905	6.48293	0	µm	488		96354.7
A5 005.nd2	2817.24	6752.34	10281.5	527.8	8	66.0297	1659.17	609	3852	9054115	535.035	6.32512	0	µm	488		109555
A5 005.nd2	2817.24	6752.34	10281.5	527.8	9	93.4241	1692.46	701	3667	13067461	427.904	5.2311	0	µm	488		158116
A5 005.nd2	2817.24	6752.34	10281.5	527.8	10	133.257	1089.95	239	2864	12003630	345.719	10.4526	0	µm	488		145244
A5 005.nd2	7065.98	6750.92	11012.9	902.1	1	36.2395	981.707	506	1869	2940212	217.021	3.69368	0	µm	488		35576.6
A5 005.nd2	7065.98	6750.92	11012.9	902.1	2	70.2889	885.697	291	2581	5145011	347.019	8.86942	0	µm	488		62254.6
A5 005.nd2	7065.98	6750.92	11012.9	902.1	3	92.2746	904.698	334	2756	6899224	294.246	7.31034	0	µm	488		83480.6
A5 005.nd2	7065.98	6750.92	11012.9	902.1	4	54.6436	780.478	430	1763	3524638	195.817	4.1	0	µm	488		42648.1
A5 005.nd2	7065.98	6750.92	11012.9	902.1	5	38.3328	1221.72	447	3299	3870414	406.544	7.38031	0	µm	488		46832
A5 005.nd2	7065.98	6750.92	11012.9	902.1	6	51.1104	1434.87	477	4095	6060906	556.193	8.58491	0	µm	488		73337
A5 005.nd2	7065.98	6750.92	11012.9	902.1	7	66.3685	1159.7	329	3555	6360955	376.457	10.5804	0	µm	488		76967.6
A5 005.nd2	7065.98	6750.92	11012.9	902.1	8	65.0133	1064.45	407	2421	5719278	400.219	5.9484	0	µm	488		69203.3
A5 005.nd2	7065.98	6750.92	11012.9	902.1	9	65.582	1512.26	521	4095	8196428	660.81	7.85989	0	µm	488		99176.8
A5 005.nd2	7065.98	6750.92	11012.9	902.1	10	56.2408	1550.14	391	3506	7205029	479.609	8.96675	0	µm	488		87180.9
A5 005.nd2	7065.98	6750.92	11012.9	902.1	11	69.938	1490.23	467	3888	8613539	429.668	8.32548	0	µm	488		104224
A5 005.nd2	7065.98	6750.92	11012.9	902.1	12	60.3669	1276.94	556	3058	6370670	380.068	5.5	0	µm	488		77085.1
A5 005.nd2	7065.98	6750.92	11012.9	902.1	13	65.219	1095.9	494	2639	5906909	323.997	5.34211	0	µm	488		71473.6
A5 005.nd2	7065.98	6750.92	11012.9	902.1	14	48.0612	1036.98	483	3287	4118894	374.066	6.80538	0	µm	488		49838.6
A5 005.nd2	7065.98	6750.92	11012.9	902.1	15	12.7413	1019.02	503	2356	1073031	290.018	4.6839	0	µm	488		12983.7
A5 005.nd2	7065.98	6750.92	11012.9	902.1	16	91.1735	954.057	409	2434	7188821	319.647	5.70023	0	µm	488		86984.7
A5 005.nd2	7065.98	6750.92	11012.9	902.1	17	84.4096	1013.85	206	2114	7072646	317.63	9.35398	0	µm	488		85579
A5 005.nd2	4960.27	6750.6	10570.8	798.3	1	62.1335	1768.54	288	3257	9081453	585.976	11.309	0	µm	488		109886
A5 005.nd2	4960.27	6750.6	10570.8	798.3	2	49.247	1570.61	584	4095	6392387	583.417	7.01199	0	µm	488		77347.9
A5 005.nd2	4960.27	6750.6	10570.8	798.3	3	34.4487	957.36	391	4002	2725603	367.505	10.2353	0	µm	488		32979.8
A5 005.nd2	4960.27	6750.6	10570.8	798.3	4	92.7707	1426.54	439	3872	10937276	520.827	8.33485	0	µm	488		132341
A5 005.nd2	4960.27	6750.6	10570.8	798.3	5	45.0846	1182.26	510	2864	4405085	414.776	5.61569	0	µm	488		53301.5
A5 005.nd2	4960.27	6750.6	10570.8	798.3	6	39.204	1172.07	348	3139	3797491	468.7	9.02012	0	µm	488		45949.6
A5 005.nd2	4960.27	6750.6	10570.8	798.3	7	92.0447	1473.23	628	4095	11206855	530.518	6.5207	0	µm	488		135603
A5 005.nd2	4960.27	6750.6	10570.8	798.3	8	180.06	1446.74	283	4095	21529011	473.697	13.8814	0	µm	488		260501
A5 005.nd2	4960.27	6750.6	10570.8	798.3	9	45.0846	1668.41	442	3616	6216514	595.564	8.18099	0	µm	488		75219.8
A5 005.nd2	4960.27	6750.6	10570.8	798.3	10	60.984	1472.66	256	4034	7422225	521.649	15.7578	0	µm	488		89808.9
A5 005.nd2	9118.47	6749.1	11147.1	910.8	1	133.511	2296.24	497	4095	25336763	866.007	8.23944	0	µm	488		306575
A5 005.nd2	9118.47	6749.1	11147.1	910.8	2	52.6592	1857.88	568	4095	8085477	716.442	7.20951	0	µm	488		97834.3
A5 005.nd2	9118.47	6749.1	11147.1	910.8	3	53.4699	1251.84	471	3335	5531897	443.908	7.08068	0	µm	488		66936
A5 005.nd2	9118.47	6749.1	11147.1	910.8	4	64.6745	1271.12	370	3217	6794153	446.701	8.22762	0	µm	488		82209.3
A5 005.nd2	9118.47	6749.1	11147.1	910.8	5	28.7012	1401.73	511	3816	3324903	447.51	7.46771	0	µm	488		40231.3
A5 005.nd2	9118.47	6749.1	11147.1	910.8	6	62.3634	1124.69	261	4095	5796649	443.176	15.6897	0	µm	488		70139.5
A5 005.nd2	9118.47	6749.1	11147.1	910.8	7	62.6659	1497.77	324	3370	7756933	422.227	9.38719	0	µm	488		93858.9
A5 005.nd2	9118.47	6749.1	11147.1	910.8	8	68.7038	1289.59	334	3363	7322290	385.103	10.0689	0	µm	488		88599.7
A5 005.nd2	9118.47	6749.1	11147.1	910.8	9	41.5998	974.903	312	2217	3351716	319.561	6.75915	0	µm	488		40555.8
A5 005.nd2	11244	6750.73	11211	1101.4	1	62.4723	1605.91	480	3960	8291299	608.155	8.25	0	µm	488		100325
A5 005.nd2	11244	6750.73	11211	1101.4	2	56.1803	1678.76	687	3447	7794493	465.893	5.01747	0	µm	488		94313.4
A5 005.nd2	11244	6750.73	11211	1101.4	3	31.944	1651.18	356	4095	4359103	611.864	11.5028	0	µm	488		52745.1
A5 005.nd2	11244	6750.73	11211	1101.4	4	31.6536	1157.76	379	2541	3028692	342.39	6.70449	0	µm	488		36647.2
A5 005.nd2	11244	6750.73	11211	1101.4	5	42.2895	1282.09	256	3574	4480904	453.164	13.9609	0	µm	488		54218.9
A5 005.nd2	11244	6750.73	11211	1101.4	6	80.7917	1223.93	579	3028	8172156	339.275	5.22971	0	µm	488		98883.1
A5 005.nd2	11244	6750.73	11211	1101.4	7	84.4096	822.784	375	2102	5739740	253.215	5.05288	0	µm	488		69450.9
A5 005.nd2	11244	6750.73	11211	1101.4	8	87.5919	1357.49	460	4095	9826866	452.366	8.42593	0	µm	488		118905
A5 005.nd2	11244	6750.73	11211	1101.4	9	59.2658	1386.43	535	3892	6790749	458.666	6.91297	0	µm	488		82168.1
A5 005.nd2	11244	6750.73	11211	1101.4	10	87.5798	1404.63	389	4095	10166711	522.275	10.527	0	µm	488		123017
A5 005.nd2	11244	6750.73	11211	1101.4	11	38.1392	1507.61	313	4007	4751976	498.76	12.8019	0	µm	488		57498.9
A5 005.nd2	11244	6750.73	11211	1101.4	12	57.7654	1189.46	473	3056	5678467	319.348	6.22403	0	µm	488		68709.5
A5 005.nd2	13540.3	6750.74	11301	1670.1	1	102.197	1565.34	374	4095	13220871	874.557	10.92	0	µm	561		159973
A5 005.nd2	13540.3	6750.74	11301	1670.1	2	127.752	1274.81	223	4095	13459393	683.552	16.5789	0	µm	561		162859
A5 005.nd2	13540.3	6750.74	11301	1670.1	3	83.0181	623.262	177	2448	4276200	362.083	13.8305	0	µm	561		51742
A5 005.nd2	13540.3	6750.74	11301	1670.1	4	54.1596	1236.5	328	4095	5534556	651.98	11.375	0	µm	561		66968.1
A5 005.nd2	15539.6	6748.79	11469.9	1722.9	1	63.1015	1705.6	436	4053	8894707	666.899	9.29587	0	µm	488		107626
A5 005.nd2	15539.6	6748.79	11469.9	1722.9	2	59.8466	1145.6	354	4095	5666115	440.928	9.86747	0	µm	488		68560
A5 005.nd2	15539.6	6748.79	11469.9	1722.9	3	49.9004	1118.82	501	2522	4614007	321.588	5.0239	0	µm	488		55829.5
A5 005.nd2	15539.6	6748.79	11469.9	1722.9	4	56.6401	951.257	389	2394	4452832	250.064	5.86765	0	µm	488		53879.3
A5 005.nd2	17574.7	6748.44	11588.8	1765.2	1	79.7632	1570.99	491	4095	10355959	711.18	8.34012	0	µm	488		125307
A5 005.nd2	17574.7	6748.44	11588.8	1765.2	2	89.0802	1760.56	589	4095	12961245	685.194	6.95246	0	µm	488		156831
A5 005.nd2	17574.7	6748.44	11588.8	1765.2	3	105.851	1908.93	724	3587	16699314	538.754	4.59283	0	µm	488		202062
A5 005.nd2	17574.7	6748.44	11588.8	1765.2	4	71.1722	1148.19	377	3128	6753656	393.162	8.29708	0	µm	488		81719.2
A5 005.nd2	17574.7	6748.44	11588.8	1765.2	5	54.8735	1394.3	529	3357	6323158	411.29	6.34594	0	µm	488		76510.2
A5 005.nd2	17574.7	6748.44	11588.8	1765.2	6	111.03	1759.05	230	4095	16141025	711.939	15.1667	0	µm	488		195306
A5 005.nd2	17574.7	6748.44	11588.8	1765.2	7	55.8899	1086.5	305	2624	5018526	366.001	7.69501	0	µm	488		60724.2
A5 005.nd2	17574.7	6748.44	11588.8	1765.2	8	69.0305	1066.03	305	2592	6081690	378.971	8.49836	0	µm	488		73588.4
A5 005.nd2	17574.7	6748.44	11588.8	1765.2	9	51.5339	980.065	264	2241	4174098	264.522	8.20879	0	µm	488		50506.6
A5 005.nd2	17574.7	6748.44	11588.8	1765.2	10	70.7608	1232.21	424	2594	7205979	295.34	5.73894	0	µm	488		87192.3
A5 005.nd2	17574.7	6748.44	11588.8	1765.2	11	64.7229	1532.98	529	4095	8199924	404.841	7.74102	0	µm	488		99219.1
																	82538.5
