# Supplementary material for: Aurora kinase A promotes trained immunity via regulation of endogenous S-adenosylmethionine metabolism
Source: eLife journal article supplement (doi:10.7554/elife.104138), 2025-01-08
Supplement: fig6-data1 [file m1.xlsx]

## Sheet: ROI Statistics
FileName	Time (ms)	Z Pos	X Pos	Y Pos	ROI ID	ROI Area [µm²]	ROI Mean Intensity	ROI Min Intensity	ROI Max Intensity	ROI Sum Intensity	ROI StDev Intensity	ROI Signal/Background	Area Fraction	Unit	Channel
M1 003.nd2	152.393	6782.67	9690	1574.6	1	74.0641	984.418	415	2528	6025623	313.063	5.87907	0	µm	488		72910
M1 003.nd2	152.393	6782.67	9690	1574.6	2	67.7358	868.83	284	1969	4863710	281.735	6.9331	0	µm	488		58850.9
M1 003.nd2	152.393	6782.67	9690	1574.6	3	23.0868	809.03	274	1690	1543630	298.74	6.16788	0	µm	488		18677.9
M1 004.nd2	155.193	6780.34	9857.8	1448.7	1	36.8324	1187.42	461	4071	3614501	553.832	8.8308	0	µm	488		43735.5
M1 004.nd2	155.193	6780.34	9857.8	1448.7	2	60.3064	1038.29	193	2484	5174836	480.188	12.42	0	µm	488		62615.5
M1 004.nd2	155.193	6780.34	9857.8	1448.7	3	48.2185	1195.2	265	4095	4762878	456.301	15.4528	0	µm	488		57630.8
M1 004.nd2	155.193	6780.34	9857.8	1448.7	4	104.762	863.106	233	2616	7472774	340.772	10.2588	0	µm	488		90420.6
M1 004.nd2	155.193	6780.34	9857.8	1448.7	5	71.753	738.663	213	2685	4380270	328.203	12.6056	0	µm	488		53001.3
M1 005.nd2	154.459	6782.66	9665.8	1013.5	1	55.6842	1548.32	327	4095	7125353	680.828	12.5229	0	µm	488		86216.8
M1 007.nd2	155.888	6780.68	10143.2	1840.3	1	60.4879	1211.88	304	3515	6058170	389.285	11.5625	0	µm	488		73303.9
M1 007.nd2	155.888	6780.68	10143.2	1840.3	2	38.8652	1293.76	342	2818	4155563	492.323	8.23977	0	µm	488		50282.3
M1 007.nd2	155.888	6780.68	10143.2	1840.3	3	64.6382	1185.28	410	2362	6331787	396.658	5.76098	0	µm	488		76614.6
M1 007.nd2	155.888	6780.68	10143.2	1840.3	4	74.1488	1094.45	248	2321	6706798	293.142	7.84122	0	µm	488		81152.3
M1 007.nd2	155.888	6780.68	10143.2	1840.3	5	44.649	1109.34	457	2312	4093454	365.423	5.05908	0	µm	488		49530.8
M1 007.nd2	155.888	6780.68	10143.2	1840.3	6	83.1875	1153.39	196	2381	7929563	404.1	12.148	0	µm	488		95947.7
M1 007.nd2	155.888	6780.68	10143.2	1840.3	7	49.5979	971.345	254	2719	3981542	425.377	10.7047	0	µm	488		48176.7
M1 007.nd2	155.888	6780.68	10143.2	1840.3	8	40.1478	1091.3	320	2516	3620924	430.29	7.8625	0	µm	488		43813.2
M1 007.nd2	155.888	6780.68	10143.2	1840.3	9	54.6557	907.475	357	3544	4099065	376.853	9.55256	0	µm	488		49598.7
M1 007.nd2	155.888	6780.68	10143.2	1840.3	10	32.67	940.422	319	2341	2539139	330.345	7.33856	0	µm	488		30723.6
M1 007.nd2	155.888	6780.68	10143.2	1840.3	11	98.6876	1159.75	206	3030	9458928	529.28	13.8356	0	µm	488		114453
M1 007.nd2	155.888	6780.68	10143.2	1840.3	12	75.4798	1459.29	294	3668	9103057	590.54	12.4762	0	µm	488		110147
M1 007.nd2	155.888	6780.68	10143.2	1840.3	13	45.3024	1304.79	369	2409	4885118	355.713	6.52846	0	µm	488		59109.9
M1 008.nd2	153.059	6780.04	10320	1845.8	1	79.0856	961.408	265	2569	6283762	310.573	9.69434	0	µm	488		76033.5
M1 008.nd2	153.059	6780.04	10320	1845.8	2	49.5132	1129.66	291	4089	4622565	560.173	14.0515	0	µm	488		55933
M1 008.nd2	153.059	6780.04	10320	1845.8	3	33.7832	1081.59	457	4095	3019805	511.507	8.96061	0	µm	488		36539.6
M1 008.nd2	153.059	6780.04	10320	1845.8	4	91.4276	1186.14	270	3500	8962511	461.533	12.963	0	µm	488		108446
M1 009.nd2	156.047	6782.69	10429.4	1917.9	1	96.437	821.334	363	2529	6546030	295.009	5.95616	0	µm	488		79207
M1 009.nd2	156.047	6782.69	10429.4	1917.9	2	86.0068	1094.56	439	3118	7780133	425.601	6.86784	0	µm	488		94139.6
M1 009.nd2	156.047	6782.69	10429.4	1917.9	3	108.368	881.824	344	2234	7897619	285.57	6.49419	0	µm	488		95561.2
M1 009.nd2	156.047	6782.69	10429.4	1917.9	4	98.7602	790.563	305	2142	6452573	290.699	7.02295	0	µm	488		78076.1
M1 009.nd2	156.047	6782.69	10429.4	1917.9	5	112.651	790.169	300	2305	7356470	250.877	6.86012	0	µm	488		89013.3
M1 010.nd2	158.771	6782.07	10586.9	1972.6	1	89.3343	844.829	364	2599	6237374	268.608	6.69845	0	µm	488		75472.2
M1 010.nd2	158.771	6782.07	10586.9	1972.6	2	112.978	958.66	203	2681	8951013	354.168	12.4698	0	µm	488		108307
M1 010.nd2	158.771	6782.07	10586.9	1972.6	3	60.2701	820.662	293	2576	4087718	304.583	8.79181	0	µm	488		49461.4
M1 010.nd2	158.771	6782.07	10586.9	1972.6	4	56.9305	906.784	386	2468	4266418	311.862	6.39378	0	µm	488		51623.7
M1 010.nd2	158.771	6782.07	10586.9	1972.6	5	148.999	925.622	345	2278	11398110	291.311	6.29282	0	µm	488		137917
M1 010.nd2	158.771	6782.07	10586.9	1972.6	6	141.848	1036.31	297	3766	12148716	362.423	9.84849	0	µm	488		146999
M1 011.nd2	161.473	6780.62	10895.4	1952.1	1	60.5484	780.383	241	2244	3905039	283.166	9.3112	0	µm	488		47251
M1 011.nd2	161.473	6780.62	10895.4	1952.1	2	46.8633	710.813	186	2095	2752980	272.124	11.2634	0	µm	488		33311.1
M1 011.nd2	161.473	6780.62	10895.4	1952.1	3	77.2222	842.215	258	2216	5375019	303.577	8.58915	0	µm	488		65037.7
M1 011.nd2	161.473	6780.62	10895.4	1952.1	4	44.5643	857.978	252	3258	3159932	344.779	12.9286	0	µm	488		38235.2
M1 011.nd2	161.473	6780.62	10895.4	1952.1	5	62.0609	764.531	280	3378	3921277	436.285	11.8526	0	µm	488		47447.5
M1 012.nd2	158.457	6781.54	11101.7	1810.5	1	20.0497	802.811	258	1945	1330257	273.949	7.53876	0	µm	488		16096.1
M1 012.nd2	158.457	6781.54	11101.7	1810.5	2	57.112	889.775	277	2001	4199738	273.341	6.60396	0	µm	488		50816.8
M1 012.nd2	158.457	6781.54	11101.7	1810.5	3	127.207	1046.13	291	2425	10997978	381.261	7.13235	0	µm	488		133076
M1 012.nd2	158.457	6781.54	11101.7	1810.5	4	69.0426	1123.09	302	3823	6408363	488.596	11.4461	0	µm	488		77541.2
M1 012.nd2	158.457	6781.54	11101.7	1810.5	5	140.529	1088.69	250	3255	12644007	370.105	11.4613	0	µm	488		152992
M1 012.nd2	158.457	6781.54	11101.7	1810.5	6	52.1026	1238.15	440	3168	5331466	443.931	7.2	0	µm	488		64510.7
M1 012.nd2	158.457	6781.54	11101.7	1810.5	7	76.835	1149.98	232	4095	7302381	584.597	17.6509	0	µm	488		88358.8
M1 013.nd2	1986.85	6782.32	11075.6	1699.1	1	71.874	1095.86	245	3055	6509419	447.024	11.485	0	µm	488		78764
M1 013.nd2	1986.85	6782.32	11075.6	1699.1	2	70.2768	1032.06	430	2276	5994185	288.292	4.9814	0	µm	488		72529.6
M1 013.nd2	1986.85	6782.32	11075.6	1699.1	3	53.1311	820.68	317	2921	3603608	308.531	9.21451	0	µm	488		43603.7
M1 013.nd2	1986.85	6782.32	11075.6	1699.1	4	82.8971	1274.48	545	4095	8731491	412.103	7.37838	0	µm	488		105651
M1 013.nd2	1986.85	6782.32	11075.6	1699.1	5	58.7455	898.27	443	1835	4361103	214.715	4.14221	0	µm	488		52769.3
M1 013.nd2	1986.85	6782.32	11075.6	1699.1	6	93.3394	984.422	413	2672	7593835	317.636	6.46973	0	µm	488		91885.4
M1 013.nd2	1986.85	6782.32	11075.6	1699.1	7	95.9167	830.031	283	1809	6579657	232.798	5.58333	0	µm	488		79613.8
M1 013.nd2	1986.85	6782.32	11075.6	1699.1	8	63.3919	1128.91	466	3132	5914371	321.334	6.51073	0	µm	488		71563.9
M1 013.nd2	6492.57	6779.65	10501.6	2818.9	1	59.774	1511.41	300	3487	7466360	535.466	11.6233	0	µm	488		90343
M1 013.nd2	6492.57	6779.65	10501.6	2818.9	2	29.9838	1516.28	364	3749	3757335	587.107	10.2995	0	µm	488		45463.8
M1 013.nd2	8569.66	6780.35	10550.1	2663.2	1	41.9144	931.372	239	2521	3226271	391.268	10.5481	0	µm	488		39037.9
M1 013.nd2	8569.66	6780.35	10550.1	2663.2	2	101.543	1032.68	247	2423	8666236	342.514	8.87097	0	µm	488		104861
M1 013.nd2	8569.66	6780.35	10550.1	2663.2	3	47.4804	1049.97	436	2633	4120084	351.201	6.03899	0	µm	488		49853
M1 013.nd2	8569.66	6780.35	10550.1	2663.2	4	22.5786	1164.79	300	4095	2173502	727.356	13.65	0	µm	488		26299.4
M1 013.nd2	8569.66	6780.35	10550.1	2663.2	5	114.599	1114.27	265	2767	10553260	435.546	9.36786	0	µm	488		127694
M1 013.nd2	10626.1	6780.9	10733.2	2629.4	1	46.9117	1235.57	481	3803	4790302	458.141	7.90644	0	µm	488		57962.7
M1 013.nd2	10626.1	6780.9	10733.2	2629.4	2	86.9385	1245.59	360	4095	8949597	513.45	10.5	0	µm	488		108290
M1 013.nd2	10626.1	6780.9	10733.2	2629.4	3	90.5201	1012.49	454	2774	7574432	314.008	5.91471	0	µm	488		91650.6
M1 013.nd2	10626.1	6780.9	10733.2	2629.4	4	89.661	1032.27	449	2910	7649099	361.884	6.48107	0	µm	488		92554.1
M1 014.nd2	186.417	6780.7	11048.6	2401.4	1	138.533	1014.84	223	2778	11618909	410.164	12.4574	0	µm	488		140589
M1 014.nd2	186.417	6780.7	11048.6	2401.4	2	131.273	1029.95	322	3435	11173939	380.83	10.6677	0	µm	488		135205
M1 014.nd2	186.417	6780.7	11048.6	2401.4	3	63.0894	1026.32	175	3234	5351218	489.72	17.4811	0	µm	488		64749.7
M1 014.nd2	186.417	6780.7	11048.6	2401.4	4	66.8041	1151.61	277	3645	6358036	474.183	13.1588	0	µm	488		76932.2
M1 014.nd2	186.417	6780.7	11048.6	2401.4	5	96.7758	944.696	253	3108	7555681	353.016	10.9053	0	µm	488		91423.7
M1 014.nd2	186.417	6780.7	11048.6	2401.4	6	50.2513	808.305	369	1978	3356890	243.571	5.36043	0	µm	488		40618.4
M1 016.nd2	178.633	6778.71	7487	2792.7	1	32.4522	1515.29	685	4095	4064019	670.971	5.9781	0	µm	488		49174.6
M1 017.nd2	178.43	6777.31	8640.9	3302.4	1	50.2997	1335.57	263	3149	5551970	469.257	11.9734	0	µm	488		67178.8
M1 017.nd2	178.43	6777.31	8640.9	3302.4	2	70.6277	1030.63	341	4095	6015790	379.257	12.0088	0	µm	488		72791.1
M1 018.nd2	1996.09	6779.65	10501.5	2818.9	1	66.7073	1359.3	267	2966	7493803	465.801	11.1086	0	µm	488		90675
M1 018.nd2	1996.09	6779.65	10501.5	2818.9	2	32.6579	1231.25	486	3025	3323156	342.344	6.22428	0	µm	488		40210.2
M1 018.nd2	1996.09	6779.65	10501.5	2818.9	3	27.8421	1317.98	397	3477	3032667	510.651	8.75819	0	µm	488		36695.3
M1 018.nd2	1996.09	6779.65	10501.5	2818.9	4	85.0509	1055.15	199	3089	7416638	485.71	14.7799	0	µm	488		89741.3
																	73465.3
