# Supplementary material for: Aurora kinase A promotes trained immunity via regulation of endogenous S-adenosylmethionine metabolism
Source: eLife journal article supplement (doi:10.7554/elife.104138), 2025-01-08
Supplement: fig6-data1 [file M2.xlsx]

## Sheet: ROI Statistics
FileName	Time (ms)	Z Pos	X Pos	Y Pos	ROI ID	ROI Area [µm²]	ROI Mean Intensity	ROI Min Intensity	ROI Max Intensity	ROI Sum Intensity	ROI StDev Intensity	ROI Signal/Background	Area Fraction	Unit	Channel
M2 001.nd2	19658.7	6766.94	12708.7	2864	1	190.95	846.719	293	3726	13362065	290.521	11.0564	0	µm	488		161681
M2 001.nd2	19658.7	6766.94	12708.7	2864	2	116.475	1460.73	302	4095	14061021	493.168	13.5596	0	µm	488		170138
M2 001.nd2	19658.7	6766.94	12708.7	2864	3	278.627	1016.71	386	3607	23411751	332.49	6.86344	0	µm	488		283282
M2 001.nd2	19658.7	6766.94	12708.7	2864	4	144.184	1319.34	439	4095	15721250	578.924	8.80645	0	µm	488		190227
M2 001.nd2	19658.7	6766.94	12708.7	2864	5	99.0264	982.895	345	3327	8044014	381.025	8.66406	0	µm	488		97332.6
M2 001.nd2	19658.7	6766.94	12708.7	2864	6	83.7925	1110.22	483	4095	7688269	433.43	8.22289	0	µm	488		93028.1
M2 001.nd2	19658.7	6766.94	12708.7	2864	7	58.5398	1141.48	532	3708	5522494	387.229	6.70524	0	µm	488		66822.2
M2 001.nd2	21871.8	6766.94	12086	2834.8	1	32.7063	1140.65	419	4000	3083175	527.546	9.54654	0	µm	488		37306.4
M2 001.nd2	21871.8	6766.94	12086	2834.8	2	54.3895	851.229	307	2215	3826274	277.321	6.81539	0	µm	488		46297.9
M2 001.nd2	21871.8	6766.94	12086	2834.8	3	140.638	761.998	298	4095	8856698	273.693	12.8774	0	µm	488		107166
M2 001.nd2	21871.8	6766.94	12086	2834.8	4	89.5279	1138.39	326	2854	8422965	325.032	8.7546	0	µm	488		101918
M2 001.nd2	21871.8	6766.94	12086	2834.8	5	74.9232	1126.5	342	4048	6975299	457.069	11.4674	0	µm	488		84401.1
M2 001.nd2	21871.8	6766.94	12086	2834.8	6	30.6251	1073.78	300	2814	2717741	495.933	9.38	0	µm	488		32884.7
M2 001.nd2	21871.8	6766.94	12086	2834.8	7	169.739	900.128	272	4095	12626993	324.646	13.65	0	µm	488		152787
M2 001.nd2	21871.8	6766.94	12086	2834.8	8	76.0485	699.358	205	3916	4395465	288.537	13.9481	0	µm	488		53185.1
M2 001.nd2	21871.8	6766.94	12086	2834.8	9	40.2083	782.141	410	1921	2599055	199.135	4.68537	0	µm	488		31448.6
M2 001.nd2	21871.8	6766.94	12086	2834.8	10	42.8582	759.592	395	2676	2690476	216.73	6.77468	0	µm	488		32554.8
M2 002.nd2	276.393	7191.06	-9051	1386.9	1	95.7594	614.586	318	1359	4863835	169.507	4.03284	0	µm	488		58852.4
M2 002.nd2	276.393	7191.06	-9051	1386.9	2	48.0733	656.762	283	1392	2609315	171.662	4.91873	0	µm	488		31572.7
M2 002.nd2	276.393	7191.06	-9051	1386.9	3	77.5731	633.88	300	2043	4063803	172.267	6.81	0	µm	488		49172
M2 002.nd2	276.393	7191.06	-9051	1386.9	4	63.6581	803.111	390	2068	4225167	241.228	5.30256	0	µm	488		51124.5
M2 002.nd2	276.393	7191.06	-9051	1386.9	5	58.3583	687.121	276	2537	3313983	256.674	9.19203	0	µm	488		40099.2
M2 002.nd2	276.393	7191.06	-9051	1386.9	6	31.0607	547.298	287	1802	1404915	126.857	6.27875	0	µm	488		16999.5
M2 002.nd2	276.393	7191.06	-9051	1386.9	7	47.8192	710.698	332	2511	2808677	253.376	7.56325	0	µm	488		33985
M2 002.nd2	276.393	7191.06	-9051	1386.9	8	76.8713	649.068	213	1885	4123526	197.124	8.56818	0	µm	488		49894.7
M2 003.nd2	157.534	7194.5	-7799.4	2383.3	1	108.501	786.138	229	4095	7049303	303.196	16.1858	0	µm	488		85296.6
M2 003.nd2	157.534	7194.5	-7799.4	2383.3	2	15.73	626.355	329	1209	814262	158.969	3.67477	0	µm	488		9852.57
M2 003.nd2	157.534	7194.5	-7799.4	2383.3	3	85.0146	743.552	380	3574	5224194	243.642	9.40526	0	µm	488		63212.7
M2 003.nd2	157.534	7194.5	-7799.4	2383.3	4	21.1387	807.044	322	4095	1409906	431.705	12.7174	0	µm	488		17059.9
M2 003.nd2	157.534	7194.5	-7799.4	2383.3	5	100.817	763.046	306	3235	6357699	281.598	8.53922	0	µm	488		76928.2
																	77550.3
