# Supplementary material for: Aurora kinase A promotes trained immunity via regulation of endogenous S-adenosylmethionine metabolism
Source: eLife journal article supplement (doi:10.7554/elife.104138), 2025-01-08
Supplement: fig6-data1 [file m3.xlsx]

## Sheet: ROI Statistics
FileName	Time (ms)	Z Pos	X Pos	Y Pos	ROI ID	ROI Area [µm²]	ROI Mean Intensity	ROI Min Intensity	ROI Max Intensity	ROI Sum Intensity	ROI StDev Intensity	ROI Signal/Background	Area Fraction	Unit	Channel
m 001.nd2	1925.47	6732.63	12606.7	2325.1	1	56.9426	1222.85	434	2865	5754731	394.536	6.60138	0	µm	488		69632.2
m 001.nd2	1925.47	6732.63	12606.7	2325.1	2	51.3887	1766.17	429	4095	7500939	720.42	9.54546	0	µm	488		90761.4
m 001.nd2	1925.47	6732.63	12606.7	2325.1	3	69.1394	1763.87	531	4095	10078759	845.946	7.71186	0	µm	488		121953
m 001.nd2	1925.47	6732.63	12606.7	2325.1	4	25.1196	1449.07	667	3417	3008263	431.488	5.12294	0	µm	488		36400
m 001.nd2	1925.47	6732.63	12606.7	2325.1	5	89.2738	985.33	371	2371	7269768	344.526	6.39084	0	µm	488		87964.2
m 001.nd2	1925.47	6732.63	12606.7	2325.1	6	53.2037	937.88	233	4095	4123860	366.446	16.5789	0	µm	488		49898.7
m 001.nd2	1925.47	6732.63	12606.7	2325.1	7	30.2863	1126.71	341	2637	2820147	294.019	7.73314	0	µm	488		34123.8
m 001.nd2	1925.47	6732.63	12606.7	2325.1	8	55.8173	1498.41	461	4095	6912180	683.357	8.88286	0	µm	488		83637.4
m 001.nd2	1925.47	6732.63	12606.7	2325.1	9	63.041	1723.51	469	4095	8979501	639.206	8.73134	0	µm	488		108652
m 001.nd2	1925.47	6732.63	12606.7	2325.1	10	104.58	1858.83	363	4095	16065867	766.843	11.281	0	µm	488		194397
m 001.nd2	1925.47	6732.63	12606.7	2325.1	11	43.2212	997.531	443	2534	3563182	294.338	5.72009	0	µm	488		43114.5
m 002.nd2	1924	6733.14	12505.4	2113	1	82.28	1801.2	533	3866	12248149	536.63	7.25328	0	µm	488		148203
m 002.nd2	1924	6733.14	12505.4	2113	2	74.4634	1622.46	505	4095	9984606	566.132	8.10891	0	µm	488		120814
m 002.nd2	1924	6733.14	12505.4	2113	3	89.4553	1574.28	519	3413	11638628	439.379	6.04071	0	µm	488		140827
m 002.nd2	1924	6733.14	12505.4	2113	4	87.4467	1367.79	503	3414	9885043	436.025	6.78728	0	µm	488		119609
m 002.nd2	1924	6733.14	12505.4	2113	5	66.0297	1463.61	443	4095	7986898	615.131	9.24379	0	µm	488		96641.5
m 002.nd2	1924	6733.14	12505.4	2113	6	36.3726	1677.76	638	4049	5043358	650.214	6.3464	0	µm	488		61024.6
m 002.nd2	1924	6733.14	12505.4	2113	7	40.2204	2103.19	358	4095	6990995	631.125	10.8333	0	µm	488		84591
m 002.nd2	1924	6733.14	12505.4	2113	8	73.689	1512.65	556	4095	9212034	486.267	7.36511	0	µm	488		111466
m 002.nd2	1924	6733.14	12505.4	2113	9	67.155	1619.38	608	4095	8987534	532.674	6.7352	0	µm	488		108749
m 002.nd2	1924	6733.14	12505.4	2113	10	75.1531	1972.77	649	4095	12252848	618.911	6.30971	0	µm	488		148259
m 002.nd2	1924	6733.14	12505.4	2113	11	46.6334	1774.74	516	4095	6839848	739.439	7.45902	0	µm	488		82762.2
m 003.nd2	1962	6731.59	12608	1879.6	1	97.3808	1999.9	576	4095	16095215	646.147	7.10938	0	µm	488		194752
m 003.nd2	1962	6731.59	12608	1879.6	2	143.058	1564.39	357	4095	18495788	613.464	9.91525	0	µm	488		223799
m 003.nd2	1962	6731.59	12608	1879.6	3	117.854	1003.82	406	2667	9777177	289.033	5.83589	0	µm	488		118304
m 003.nd2	1962	6731.59	12608	1879.6	4	76.1695	1099.65	450	2508	6922286	341.591	5.57333	0	µm	488		83759.7
m 003.nd2	1962	6731.59	12608	1879.6	5	81.917	1675.58	441	4095	11343663	834.071	8.27273	0	µm	488		137258
m 003.nd2	1962	6731.59	12608	1879.6	6	94.3437	974.155	350	3497	7595490	298.334	7.73429	0	µm	488		91905.4
m 003.nd2	1962	6731.59	12608	1879.6	7	65.5699	1119.32	280	3328	6065574	436.202	10.4654	0	µm	488		73393.4
m 003.nd2	1962	6731.59	12608	1879.6	8	138.339	993.746	245	2522	11361501	284.797	10.2939	0	µm	488		137474
m 005.nd2	1933.72	6730.62	12669.9	2118.7	1	95.3843	1057.54	366	2444	8336588	319.238	6.6776	0	µm	488		100873
m 005.nd2	1933.72	6730.62	12669.9	2118.7	2	69.7081	977.922	409	3085	5633810	306.129	7.54279	0	µm	488		68169.1
m 005.nd2	1933.72	6730.62	12669.9	2118.7	3	40.9343	1061.31	307	2346	3590421	338.194	7.64169	0	µm	488		43444.1
m 005.nd2	1933.72	6730.62	12669.9	2118.7	4	59.8345	757.245	275	2156	3744575	271.089	7.84	0	µm	488		45309.4
m 005.nd2	1933.72	6730.62	12669.9	2118.7	5	103.879	1502.23	283	4095	12896637	618.973	12.8774	0	µm	488		156049
m 005.nd2	1933.72	6730.62	12669.9	2118.7	6	43.1244	1261.39	444	3826	4495578	556.001	8.61712	0	µm	488		54396.5
m 005.nd2	1933.72	6730.62	12669.9	2118.7	7	51.6912	945.715	299	2321	4040093	320.724	7.76254	0	µm	488		48885.1
m 005.nd2	1933.72	6730.62	12669.9	2118.7	8	120.407	935.201	340	2785	9306189	257.672	7.12276	0	µm	488		112605
m 005.nd2	1933.72	6730.62	12669.9	2118.7	9	180.375	1070.59	228	3469	15959276	387.578	14.0445	0	µm	488		193107
m 005.nd2	1933.72	6730.62	12669.9	2118.7	10	70.9423	799.138	206	2381	4685348	239.212	11.5583	0	µm	488		56692.7
m 005.nd2	1933.72	6730.62	12669.9	2118.7	11	50.0819	1209.34	330	3485	5005460	482.633	10.5606	0	µm	488		60566.1
m 005.nd2	1933.72	6730.62	12669.9	2118.7	12	118.786	1886	573	4095	18514843	576.308	6.15789	0	µm	488		224030
m 005.nd2	1933.72	6730.62	12669.9	2118.7	13	82.3768	1040.66	312	2811	7084798	488.806	8.44144	0	µm	488		85726.1
m 005.nd2	1933.72	6730.62	12669.9	2118.7	14	85.1477	1424.74	541	3592	10025873	529.275	6.63956	0	µm	488		121313
m 005.nd2	1933.72	6730.62	12669.9	2118.7	15	77.4884	1043.42	254	3038	6682091	436.304	10.5854	0	µm	488		80853.3
m 005.nd2	1933.72	6730.62	12669.9	2118.7	16	28.4713	1460.85	551	3398	3437382	481.508	6.16697	0	µm	488		41592.3
m 005.nd2	1933.72	6730.62	12669.9	2118.7	17	46.7665	1339.1	360	2870	5175625	464.42	7.97222	0	µm	488		62625.1
m 005.nd2	1933.72	6730.62	12669.9	2118.7	18	51.0499	1174.2	551	2208	4953946	269.175	4.00726	0	µm	488		59942.7
m 007.nd2	1937.18	6729.65	13355.5	2154.4	1	127.389	2261.04	494	4095	23804262	774.081	7.71186	0	µm	488		288032
m 007.nd2	1937.18	6729.65	13355.5	2154.4	2	120.879	1855.36	486	4095	18535019	588.11	8.42593	0	µm	488		224274
m 007.nd2	1937.18	6729.65	13355.5	2154.4	3	148.479	1562.94	359	4095	19178873	739.098	10.8047	0	µm	488		232064
m 007.nd2	1937.18	6729.65	13355.5	2154.4	4	70.8213	1125.81	486	3577	6589352	397.571	7.36008	0	µm	488		79731.2
m 007.nd2	1937.18	6729.65	13355.5	2154.4	5	60.4274	1095.27	476	2554	5469798	316.394	5.2229	0	µm	488		66184.6
m 007.nd2	1937.18	6729.65	13355.5	2154.4	6	106.504	1243.39	301	4095	10944284	537.557	11.8012	0	µm	488		132426
m 007.nd2	1937.18	6729.65	13355.5	2154.4	7	60.5121	1105.56	400	4095	5528928	331.718	10.2375	0	µm	488		66900
m 007.nd2	1937.18	6729.65	13355.5	2154.4	8	59.1811	1006.52	332	2762	4922888	387.343	8.31928	0	µm	488		59566.9
m 007.nd2	1937.18	6729.65	13355.5	2154.4	9	59.0722	1354.9	312	4095	6614632	533.633	12.3343	0	µm	488		80037
m 008.nd2	1926.15	6729.81	13789.2	1871.4	1	105.04	956.116	294	3147	8300039	328.444	9.71296	0	µm	488		100430
m 008.nd2	1926.15	6729.81	13789.2	1871.4	2	111.042	873.349	352	2389	8014727	270.933	5.53018	0	µm	488		96978.2
m 008.nd2	1926.15	6729.81	13789.2	1871.4	3	77.3069	1479.16	400	4095	9450359	595.172	9.26471	0	µm	488		114349
m 008.nd2	1926.15	6729.81	13789.2	1871.4	4	100.599	1087.39	324	3173	9040573	355.569	8.50751	0	µm	488		109391
m 008.nd2	1926.15	6729.81	13789.2	1871.4	5	108.234	1281.76	316	3834	11465322	555.214	10.9543	0	µm	488		138730
m 008.nd2	1926.15	6729.81	13789.2	1871.4	6	104.072	958.119	246	2403	8240778	298.062	8.30916	0	µm	488		99713.4
m 008.nd2	1926.15	6729.81	13789.2	1871.4	7	75.0563	1143.53	303	2894	7093336	375.685	7.99448	0	µm	488		85829.4
m 008.nd2	1926.15	6729.81	13789.2	1871.4	8	61.3712	1536.02	501	3023	7790710	453.491	5.4808	0	µm	488		94267.6
m 008.nd2	1926.15	6729.81	13789.2	1871.4	9	54.571	883.351	328	2366	3983912	328.026	6.62745	0	µm	488		48205.3
m 008.nd2	1926.15	6729.81	13789.2	1871.4	10	71.1117	1070.89	457	2420	6293598	260.789	5.2954	0	µm	488		76152.5
m 008.nd2	1926.15	6729.81	13789.2	1871.4	11	106.395	1220.61	447	2966	10732783	450.89	5.932	0	µm	488		129867
m 008.nd2	1926.15	6729.81	13789.2	1871.4	12	89.7457	1062.75	429	3276	7882443	342.878	7.63636	0	µm	488		95377.6
m 009.nd2	1941.2	6728.56	13907.8	1807.4	1	54.6799	1033.55	292	2782	4670594	364.906	9.5274	0	µm	488		56514.2
m 009.nd2	1941.2	6728.56	13907.8	1807.4	2	47.8434	1251.64	410	3312	4948977	568.753	8.03884	0	µm	488		59882.6
m 009.nd2	1941.2	6728.56	13907.8	1807.4	3	55.5995	986.253	371	2849	4531832	411.957	7.67924	0	µm	488		54835.2
m 009.nd2	1941.2	6728.56	13907.8	1807.4	4	77.6336	787.321	314	2161	5051454	228.237	6.88217	0	µm	488		61122.6
m 009.nd2	1941.2	6728.56	13907.8	1807.4	5	69.9864	738.91	279	1952	4273855	270.673	6.99642	0	µm	488		51713.6
m 009.nd2	1941.2	6728.56	13907.8	1807.4	6	80.0899	1079.41	392	3727	7144622	446.728	9.27114	0	µm	488		86449.9
m 009.nd2	1941.2	6728.56	13907.8	1807.4	7	67.9899	791.976	339	1685	4450113	231.635	4.5664	0	µm	488		53846.4
m 009.nd2	1941.2	6728.56	13907.8	1807.4	8	66.2475	1086.24	378	2642	5947191	421.891	6.98942	0	µm	488		71961
m 009.nd2	1941.2	6728.56	13907.8	1807.4	9	73.5801	1091.85	270	4095	6639539	553.04	13.4262	0	µm	488		80338.4
m 009.nd2	1941.2	6728.56	13907.8	1807.4	10	77.5005	1252.94	344	2930	8025087	435.314	8.51744	0	µm	488		97103.6
m 009.nd2	1941.2	6728.56	13907.8	1807.4	11	21.7074	959.585	291	3037	1721496	462.142	10.4364	0	µm	488		20830.1
m 009.nd2	1941.2	6728.56	13907.8	1807.4	12	86.0673	1052.45	273	3013	7486073	451.314	11.0366	0	µm	488		90581.5
m 009.nd2	1941.2	6728.56	13907.8	1807.4	13	88.9592	1446.38	318	4095	10633770	677.86	12.8774	0	µm	488		128669
m 010.nd2	1972.13	6728.52	13917.9	1601.3	1	80.2835	1378.05	313	4095	9143351	574.211	13.0831	0	µm	488		110635
m 010.nd2	1972.13	6728.52	13917.9	1601.3	2	27.7937	2108.11	458	4095	4842328	1061.75	8.94105	0	µm	488		58592.2
m 010.nd2	1972.13	6728.52	13917.9	1601.3	3	74.9353	1311.51	292	3165	8122174	492.462	9.89062	0	µm	488		98278.3
m 010.nd2	1972.13	6728.52	13917.9	1601.3	4	116.426	1089.42	273	3359	10482435	398.574	10.3354	0	µm	488		126837
m 010.nd2	1972.13	6728.52	13917.9	1601.3	5	50.9289	1394.07	215	2911	5867632	427.554	13.5395	0	µm	488		70998.3
m 010.nd2	1972.13	6728.52	13917.9	1601.3	6	30.976	1349.53	285	3089	3454806	467.171	10.8386	0	µm	488		41803.2
m 010.nd2	1972.13	6728.52	13917.9	1601.3	7	66.9372	995.124	410	2221	5505024	272.727	5.41707	0	µm	488		66610.8
m 010.nd2	1972.13	6728.52	13917.9	1601.3	8	108.537	1346.84	341	4095	12081114	534.037	10.2375	0	µm	488		146181
m 010.nd2	1972.13	6728.52	13917.9	1601.3	9	82.0985	944.898	235	2733	6411135	432.882	11.6298	0	µm	488		77574.7
m 010.nd2	1972.13	6728.52	13917.9	1601.3	10	58.7697	1784.31	218	4095	8666397	788.162	16.4458	0	µm	488		104863
m 010.nd2	1972.13	6728.52	13917.9	1601.3	11	76.0727	1105.91	421	2991	6952870	353.021	6.97203	0	µm	488		84129.7
m 010.nd2	1972.13	6728.52	13917.9	1601.3	12	48.7509	972.04	367	2518	3916348	337.949	6.47411	0	µm	488		47387.8
m 010.nd2	1972.13	6728.52	13917.9	1601.3	13	30.6493	1213.37	486	2474	3073458	297.472	5.09054	0	µm	488		37188.8
m 010.nd2	1972.13	6728.52	13917.9	1601.3	14	27.2129	1119.78	408	3246	2518393	535.652	7.95588	0	µm	488		30472.6
m 012.nd2	306.151	6728.87	13891.4	1267.7	1	100.769	1002.44	198	2652	8348348	404.059	11.3333	0	µm	488		101015
m 012.nd2	306.151	6728.87	13891.4	1267.7	2	64.9165	1028.9	204	2088	5520032	313.685	9.32143	0	µm	488		66792.4
m 012.nd2	306.151	6728.87	13891.4	1267.7	3	87.2289	1089.25	281	3332	7852382	496.924	10.9246	0	µm	488		95013.8
m 012.nd2	306.151	6728.87	13891.4	1267.7	4	42.6525	1237.74	440	2907	4363024	357.963	6.60682	0	µm	488		52792.6
m 012.nd2	306.151	6728.87	13891.4	1267.7	5	108.84	897.478	332	2461	8072811	348.528	7.25959	0	µm	488		97681
m 012.nd2	306.151	6728.87	13891.4	1267.7	6	54.8735	647.877	205	2890	2938123	276.135	14.0976	0	µm	488		35551.3
m 012.nd2	306.151	6728.87	13891.4	1267.7	7	59.3747	1021.3	329	3036	5011532	467.314	9.22796	0	µm	488		60639.5
m 012.nd2	306.151	6728.87	13891.4	1267.7	8	97.1751	1155.35	253	3290	9278592	379.84	13.004	0	µm	488		112271
m 012.nd2	306.151	6728.87	13891.4	1267.7	9	43.9956	1157.13	346	3085	4207313	381.919	8.91619	0	µm	488		50908.5
m 012.nd2	306.151	6728.87	13891.4	1267.7	10	70.1316	976.489	304	2530	5659730	305.087	8.32237	0	µm	488		68482.7
m 012.nd2	306.151	6728.87	13891.4	1267.7	11	66.8404	805.19	267	3087	4447867	357.797	11.5618	0	µm	488		53819.2
m 012.nd2	306.151	6728.87	13891.4	1267.7	12	122.307	1204.92	372	4095	12179299	482.096	11.0081	0	µm	488		147370
m 012.nd2	306.151	6728.87	13891.4	1267.7	13	57.1483	919.184	356	2022	4341308	278.905	5.67978	0	µm	488		52529.8
m 012.nd2	306.151	6728.87	13891.4	1267.7	14	37.5705	746.86	277	1529	2319001	178.954	5.51986	0	µm	488		28059.9
m 012.nd2	306.151	6728.87	13891.4	1267.7	15	52.3325	796.694	344	2932	3445703	232.577	8.52326	0	µm	488		41693
m 012.nd2	306.151	6728.87	13891.4	1267.7	16	104.471	981.818	307	2409	8477020	315.374	7.84691	0	µm	488		102572
m 012.nd2	306.151	6728.87	13891.4	1267.7	17	72.7331	908.49	236	2298	5460931	307.257	9.52119	0	µm	488		66077.3
m 012.nd2	306.151	6728.87	13891.4	1267.7	18	91.0404	765.88	270	1604	5762481	224.048	4.74545	0	µm	488		69726
m 012.nd2	306.151	6728.87	13891.4	1267.7	19	40.3898	810.835	206	1857	2706568	259.249	9.01456	0	µm	488		32749.5
m 013.nd2	1951	6727.78	13891.2	1096.5	1	116.608	1061.72	319	2965	10231758	384.766	9.29467	0	µm	488		123804
m 013.nd2	1951	6727.78	13891.2	1096.5	2	102.959	1088.9	257	3779	9265444	395.534	14.7043	0	µm	488		112112
m 013.nd2	1951	6727.78	13891.2	1096.5	3	60.0523	1499.66	479	3526	7442811	506.926	7.36117	0	µm	488		90058
m 013.nd2	1951	6727.78	13891.2	1096.5	4	82.401	871.939	332	3620	5937905	320.469	10.8383	0	µm	488		71848.7
m 013.nd2	1951	6727.78	13891.2	1096.5	5	76.7987	828.712	332	2393	5259838	320.031	7.20783	0	µm	488		63644
m 013.nd2	1951	6727.78	13891.2	1096.5	6	65.6546	1010.09	271	3032	5480764	396.968	11.1882	0	µm	488		66317.2
m 013.nd2	1951	6727.78	13891.2	1096.5	7	75.5161	909.578	388	3237	5676677	285.828	8.34278	0	µm	488		68687.8
m 013.nd2	1951	6727.78	13891.2	1096.5	8	69.1394	913.868	369	3413	5221841	422.627	8.68448	0	µm	488		63184.3
m 013.nd2	1951	6727.78	13891.2	1096.5	9	75.0563	1315.76	437	3296	8161653	472.644	7.54233	0	µm	488		98756
m 013.nd2	1951	6727.78	13891.2	1096.5	10	128.466	1356.96	343	3174	14406871	457.054	7.91521	0	µm	488		174323
m 013.nd2	1951	6727.78	13891.2	1096.5	11	75.9154	1224.71	438	3124	7683853	467.905	7.13242	0	µm	488		92974.6
m 013.nd2	1951	6727.78	13891.2	1096.5	12	67.1308	1087.09	412	3316	6031185	336.55	8.04854	0	µm	488		72977.3
m 013.nd2	1951	6727.78	13891.2	1096.5	13	114.635	1162.59	287	4095	11014374	449.829	14.2683	0	µm	488		133274
m 013.nd2	1951	6727.78	13891.2	1096.5	14	79.134	1276.79	370	4095	8350205	516.849	11.0676	0	µm	488		101037
m 013.nd2	1951	6727.78	13891.2	1096.5	15	89.2375	1281.11	463	4095	9448212	486.098	8.84449	0	µm	488		114323
m 013.nd2	1951	6727.78	13891.2	1096.5	16	57.0999	792.81	200	1941	3741271	282.466	9.705	0	µm	488		45269.4
m 013.nd2	1951	6727.78	13891.2	1096.5	17	41.0069	494.823	258	1747	1676954	163.628	6.77132	0	µm	488		20291.1
m 013.nd2	1951	6727.78	13891.2	1096.5	18	85.3655	1294.28	395	3430	9131127	551.396	8.29873	0	µm	488		110487
m 013.nd2	1951	6727.78	13891.2	1096.5	19	54.692	2188.5	301	4095	9892006	780.421	13.6047	0	µm	488		119693
m 016.nd2	298.768	6728.22	14059.1	1015	1	108.924	1318.48	272	4095	11868913	493.24	13.0414	0	µm	488		143614
m 016.nd2	298.768	6728.22	14059.1	1015	2	140.844	1210.06	206	2891	14085065	339.974	14.034	0	µm	488		170429
m 016.nd2	298.768	6728.22	14059.1	1015	3	80.4892	1558.51	456	3929	10367214	490.264	8.61623	0	µm	488		125443
m 016.nd2	298.768	6728.22	14059.1	1015	4	44.9031	1081.36	269	4095	4012924	449.14	15.223	0	µm	488		48556.4
m 016.nd2	298.768	6728.22	14059.1	1015	5	70.301	1187.98	290	3759	6902185	433.1	12.9621	0	µm	488		83516.4
m 016.nd2	298.768	6728.22	14059.1	1015	6	124.957	1041.15	304	3121	10751955	361.835	10.2664	0	µm	488		130099
m 016.nd2	298.768	6728.22	14059.1	1015	7	57.5597	893.243	288	2682	4249159	345.897	9.3125	0	µm	488		51414.8
m 016.nd2	298.768	6728.22	14059.1	1015	8	92.0447	838.792	346	1876	6380693	221.02	5.21111	0	µm	488		77206.4
m 019.nd2	297.789	6727.61	15139.6	2075.8	1	100.103	1110.28	390	2721	9185373	372.059	6.97692	0	µm	488		111143
m 019.nd2	297.789	6727.61	15139.6	2075.8	2	41.7934	958.965	215	2694	3312264	364.867	12.5302	0	µm	488		40078.4
m 019.nd2	297.789	6727.61	15139.6	2075.8	3	65.1464	1126.95	356	4095	6067517	540.22	11.5028	0	µm	488		73417
m 019.nd2	297.789	6727.61	15139.6	2075.8	4	118.265	811.344	289	2056	7930078	270.314	6.24924	0	µm	488		95953.9
m 024.nd2	294.834	6727.18	13370	105	1	83.7199	1387.57	249	3500	9600618	448.337	11.254	0	µm	488		116167
m 024.nd2	294.834	6727.18	13370	105	2	105.258	1224.67	500	3417	10653385	449.624	6.68689	0	µm	488		128906
m 024.nd2	294.834	6727.18	13370	105	3	91.8511	1323	257	2755	10042924	450.926	10.7198	0	µm	488		121519
m 024.nd2	294.834	6727.18	13370	105	4	95.2754	1310.26	561	4095	10317002	437.026	7.22222	0	µm	488		124836
m 024.nd2	294.834	6727.18	13370	105	5	61.6495	1409.22	481	3068	7179954	372.075	6.37838	0	µm	488		86877.4
m 024.nd2	294.834	6727.18	13370	105	6	70.5188	1179.07	452	3298	6871642	357.812	6.37911	0	µm	488		83146.9
m 024.nd2	294.834	6727.18	13370	105	7	97.2114	1790.86	706	3587	14387767	498.184	4.95892	0	µm	488		174092
m 024.nd2	294.834	6727.18	13370	105	8	66.0055	904.181	427	2939	4932307	306.252	6.8829	0	µm	488		59680.9
m 024.nd2	294.834	6727.18	13370	105	9	81.6992	1201.83	559	3158	8114754	332.417	5.22848	0	µm	488		98188.5
m 024.nd2	294.834	6727.18	13370	105	10	57.4145	1233.03	536	2641	5850750	424.144	4.92724	0	µm	488		70794.1
m 024.nd2	294.834	6727.18	13370	105	11	90.4596	1219.87	462	4095	9119722	396.553	8.02941	0	µm	488		110349
m 024.nd2	294.834	6727.18	13370	105	12	101.519	1042.08	337	3112	8743010	368.394	9.23442	0	µm	488		105790
m 024.nd2	294.834	6727.18	13370	105	13	82.4615	983.968	458	2589	6705744	271.184	5.25328	0	µm	488		81139.5
m 024.nd2	294.834	6727.18	13370	105	14	76.2058	1302.39	255	2833	8202483	352.09	11.1098	0	µm	488		99250
m 024.nd2	294.834	6727.18	13370	105	15	71.6562	1375.78	593	4095	8147357	487.671	6.90557	0	µm	488		98583
m 024.nd2	294.834	6727.18	13370	105	16	93.9686	1388.08	604	4095	10779815	332.258	6.45899	0	µm	488		130436
m 027.nd2	297.148	6726.99	13372.2	493.1	1	113.062	1022.98	491	2136	9558704	226.966	3.78053	0	µm	488		115660
m 027.nd2	297.148	6726.99	13372.2	493.1	2	101.483	991.196	389	2494	8313157	228.318	6.26633	0	µm	488		100589
m 027.nd2	297.148	6726.99	13372.2	493.1	3	63.162	973.354	408	2061	5080910	234.863	5.05147	0	µm	488		61479
m 027.nd2	297.148	6726.99	13372.2	493.1	4	99.2079	1608.64	729	3310	13189262	364.799	4.54047	0	µm	488		159590
m 027.nd2	297.148	6726.99	13372.2	493.1	5	85.4139	1115.46	481	3519	7874007	310.84	7.31601	0	µm	488		95275.5
m 027.nd2	297.148	6726.99	13372.2	493.1	6	87.6887	1123.78	522	2040	8144001	243.103	3.90805	0	µm	488		98542.4
m 027.nd2	297.148	6726.99	13372.2	493.1	7	58.1405	975.087	489	3290	4685293	299.868	6.46365	0	µm	488		56692
m 027.nd2	297.148	6726.99	13372.2	493.1	8	40.7891	1495.49	481	2795	5041297	379.422	5.70686	0	µm	488		60999.7
m 027.nd2	297.148	6726.99	13372.2	493.1	9	69.2241	1084.18	414	3245	6202622	408.703	7.83816	0	µm	488		75051.7
m 027.nd2	297.148	6726.99	13372.2	493.1	10	79.7511	1476.66	512	4095	9732647	448.253	7.99805	0	µm	488		117765
m 028.nd2	319.227	6728.01	13244.3	492.9	1	100.793	1056	330	2811	8796463	334.211	7.30769	0	µm	488		106437
m 028.nd2	319.227	6728.01	13244.3	492.9	2	68.123	1360.21	377	2810	7657984	284.922	7.45358	0	µm	488		92661.6
m 028.nd2	319.227	6728.01	13244.3	492.9	3	141.243	1672.08	715	4095	19518246	465.7	5.51144	0	µm	488		236171
m 028.nd2	319.227	6728.01	13244.3	492.9	4	100.624	1305.45	523	3064	10856137	324.004	5.34729	0	µm	488		131359
m 028.nd2	319.227	6728.01	13244.3	492.9	5	55.0671	929.308	404	2199	4229282	277.719	5.44307	0	µm	488		51174.3
m 028.nd2	319.227	6728.01	13244.3	492.9	6	68.3166	1140.33	480	4095	6438317	366.519	8.28947	0	µm	488		77903.6
m 028.nd2	319.227	6728.01	13244.3	492.9	7	38.962	1438.1	495	4095	4630681	443.311	8.27273	0	µm	488		56031.2
m 028.nd2	319.227	6728.01	13244.3	492.9	8	91.6454	1009.65	409	4095	7647092	359.177	10.0122	0	µm	488		92529.8
m 029.nd2	298.315	6727.14	12980.4	479.9	1	92.2625	1292.1	445	2724	9852263	393.898	6.12135	0	µm	488		119212
m 029.nd2	298.315	6727.14	12980.4	479.9	2	65.0254	1112.72	425	2055	5979748	293.513	4.83529	0	µm	488		72355
m 029.nd2	298.315	6727.14	12980.4	479.9	3	61.2139	964.476	434	1928	4879286	248.13	4.4424	0	µm	488		59039.4
m 029.nd2	298.315	6727.14	12980.4	479.9	4	69.2725	1164.9	438	2773	6669075	369.934	6.33105	0	µm	488		80695.8
m 029.nd2	298.315	6727.14	12980.4	479.9	5	65.7998	889.976	425	3254	4839690	268.307	7.65647	0	µm	488		58560.2
m 029.nd2	298.315	6727.14	12980.4	479.9	6	119.04	1382.84	307	4095	13604343	362.378	13.3388	0	µm	488		164613
m 029.nd2	298.315	6727.14	12980.4	479.9	7	88.4268	1184.86	505	4095	8658958	348.992	8.10891	0	µm	488		104773
m 029.nd2	298.315	6727.14	12980.4	479.9	8	131.188	1829.8	645	4095	19838667	603.713	6.34884	0	µm	488		240048
m 029.nd2	298.315	6727.14	12980.4	479.9	9	73.447	1443.73	589	4095	8763446	364.397	6.95246	0	µm	488		106038
m 029.nd2	298.315	6727.14	12980.4	479.9	10	93.2547	1179.11	523	2403	9087372	351.231	4.40917	0	µm	488		109957
m 029.nd2	298.315	6727.14	12980.4	479.9	11	126.348	1498.87	529	4095	15651152	492.853	7.74102	0	µm	488		189379
m 029.nd2	298.315	6727.14	12980.4	479.9	12	73.8705	1806.82	759	4095	11030636	545.102	5.39526	0	µm	488		133471
m 029.nd2	298.315	6727.14	12980.4	479.9	13	65.4852	1071.36	503	2634	5798176	338.374	5.23658	0	µm	488		70157.9
m 029.nd2	298.315	6727.14	12980.4	479.9	14	59.0722	1662.72	724	3236	8117389	440.273	4.46961	0	µm	488		98220.4
m 029.nd2	298.315	6727.14	12980.4	479.9	15	61.5527	1445.33	674	3660	7352390	390.032	5.4062	0	µm	488		88963.9
m 029.nd2	298.315	6727.14	12980.4	479.9	16	54.5226	1437.78	566	4095	6478649	593.594	7.23498	0	µm	488		78391.7
m 029.nd2	298.315	6727.14	12980.4	479.9	17	38.357	1258.71	315	3154	3990118	417.53	10.0127	0	µm	488		48280.4
m 029.nd2	298.315	6727.14	12980.4	479.9	18	53.4699	1175.48	563	2872	5194441	298.908	5.10124	0	µm	488		62852.7
																	95174.6
