# Supplementary material for: Aurora kinase A promotes trained immunity via regulation of endogenous S-adenosylmethionine metabolism
Source: eLife journal article supplement (doi:10.7554/elife.104138), 2025-01-08
Supplement: fig6-data1 [file m5.xlsx]

## Sheet: ROI Statistics
FileName	Time (ms)	Z Pos	X Pos	Y Pos	ROI ID	ROI Area [µm²]	ROI Mean Intensity	ROI Min Intensity	ROI Max Intensity	ROI Sum Intensity	ROI StDev Intensity	ROI Signal/Background	Area Fraction	Unit	Channel
m5 001.nd2	277.863	7184.6	12371.3	237.8	1	56.2166	1246.21	587	3130	5789884	322.543	5.26936	0	µm	488		70057.6
m5 001.nd2	277.863	7184.6	12371.3	237.8	2	54.0144	1258.68	556	4095	5618744	433.052	7.36511	0	µm	488		67986.8
m5 001.nd2	277.863	7184.6	12371.3	237.8	3	74.1609	1021.11	555	1769	6258388	199.948	2.93366	0	µm	488		75726.5
m5 001.nd2	277.863	7184.6	12371.3	237.8	4	119.693	1344.58	622	4095	13300557	358.261	6.29032	0	µm	488		160937
m5 001.nd2	277.863	7184.6	12371.3	237.8	5	75.3709	1283.8	636	4095	7996774	340.646	6.43868	0	µm	488		96761
m5 001.nd2	277.863	7184.6	12371.3	237.8	6	60.2096	1491.01	748	4095	7419281	470.518	5.19011	0	µm	488		89773.3
m5 001.nd2	277.863	7184.6	12371.3	237.8	7	75.988	1234.63	620	2871	7753471	299.673	4.63065	0	µm	488		93817
m5 001.nd2	277.863	7184.6	12371.3	237.8	8	98.4335	1337.91	478	2990	10883871	409.884	6.22917	0	µm	488		131695
m5 001.nd2	277.863	7184.6	12371.3	237.8	9	74.2214	1269.96	402	2521	7789908	374.267	6.27114	0	µm	488		94257.9
m5 002.nd2	284.968	7181.91	12628.3	193.1	1	86.5634	1223.04	436	3127	8749603	350.945	7.17202	0	µm	488		105870
m5 002.nd2	284.968	7181.91	12628.3	193.1	2	44.9757	990.331	515	1933	3681062	249.727	3.6749	0	µm	488		44540.9
m5 002.nd2	284.968	7181.91	12628.3	193.1	3	73.5922	1046.41	423	3336	6364282	329.201	6.91991	0	µm	488		77007.8
m5 002.nd2	284.968	7181.91	12628.3	193.1	4	73.9431	1399.5	383	3323	8552322	426.194	8.14461	0	µm	488		103483
m5 002.nd2	284.968	7181.91	12628.3	193.1	5	38.7442	997.365	452	1964	3193563	267.099	4.31648	0	µm	488		38642.1
m5 002.nd2	284.968	7181.91	12628.3	193.1	6	54.3411	1309.7	592	2780	5881848	308.191	4.69595	0	µm	488		71170.4
m5 002.nd2	284.968	7181.91	12628.3	193.1	7	47.4441	1755.16	661	4095	6881994	524.471	6.19516	0	µm	488		83272.1
m5 002.nd2	284.968	7181.91	12628.3	193.1	8	82.2195	1493.76	371	4095	10150101	541.878	9.1	0	µm	488		122816
m5 002.nd2	284.968	7181.91	12628.3	193.1	9	94.0412	1146.96	552	3150	8914204	294.214	5.43103	0	µm	488		107862
m5 002.nd2	284.968	7181.91	12628.3	193.1	10	54.7888	1239.89	591	2711	5614209	324.915	4.58714	0	µm	488		67931.9
m5 002.nd2	284.968	7181.91	12628.3	193.1	11	52.1147	1639.83	596	4095	7062767	641.3	6.8708	0	µm	488		85459.5
m5 002.nd2	284.968	7181.91	12628.3	193.1	12	35.2594	1098.25	514	2811	3200306	357.808	5.46887	0	µm	488		38723.7
m5 002.nd2	284.968	7181.91	12628.3	193.1	13	24.1879	1118.91	554	4095	2236693	401.447	7.3917	0	µm	488		27064
m5 002.nd2	284.968	7181.91	12628.3	193.1	14	33.7953	1044.16	432	2259	2916335	292.447	5.22917	0	µm	488		35287.7
m5 003.nd2	283.801	7186.83	12831.1	654.8	1	101.12	896.255	464	3144	7490002	219.093	4.90086	0	µm	488		90629
m5 003.nd2	283.801	7186.83	12831.1	654.8	2	19.2148	974.737	549	1822	1547883	199.213	3.31876	0	µm	488		18729.4
m5 003.nd2	283.801	7186.83	12831.1	654.8	3	18.5614	964.943	619	1874	1480223	180.006	3.02746	0	µm	488		17910.7
m5 003.nd2	283.801	7186.83	12831.1	654.8	4	65.4247	989.08	488	2479	5347957	327.117	5.07992	0	µm	488		64710.3
m5 003.nd2	283.801	7186.83	12831.1	654.8	5	67.6269	1023.36	578	2776	5719568	242.425	4.80277	0	µm	488		69206.8
m5 003.nd2	283.801	7186.83	12831.1	654.8	6	128.804	1664.59	609	4095	17719537	560.601	6.72414	0	µm	488		214406
m5 003.nd2	283.801	7186.83	12831.1	654.8	7	99.2442	957.626	473	2452	7854448	230.428	4.27165	0	µm	488		95038.8
m5 003.nd2	283.801	7186.83	12831.1	654.8	8	65.34	1084.79	465	2122	5857885	270.477	4.56344	0	µm	488		70880.4
m5 003.nd2	283.801	7186.83	12831.1	654.8	9	77.6336	1306.04	535	3173	8379524	404.227	5.64591	0	µm	488		101392
m5 003.nd2	283.801	7186.83	12831.1	654.8	10	113.522	1205.61	491	2690	11311037	253.419	5.47861	0	µm	488		136864
m5 003.nd2	283.801	7186.83	12831.1	654.8	11	63.7065	1346.32	548	3206	7088382	407.835	5.85037	0	µm	488		85769.4
m5 004.nd2	280.59	7185.3	13270.3	768.7	1	142.26	1537.48	413	3602	18076206	448.64	8.72155	0	µm	488		218722
m5 004.nd2	280.59	7185.3	13270.3	768.7	2	109.082	1581.34	440	4095	14255798	558.946	8.39139	0	µm	488		172495
m5 004.nd2	280.59	7185.3	13270.3	768.7	3	95.4811	1229.72	352	2582	9703733	323.836	6.99729	0	µm	488		117415
m5 004.nd2	280.59	7185.3	13270.3	768.7	4	71.6683	805.232	420	1776	4769387	179.535	4.22857	0	µm	488		57709.6
m5 004.nd2	280.59	7185.3	13270.3	768.7	5	53.5788	968.35	384	2104	4287853	253.948	5.08213	0	µm	488		51883
m5 004.nd2	280.59	7185.3	13270.3	768.7	6	76.3631	1202.04	573	4072	7586067	323.436	6.82077	0	µm	488		91791.4
m5 004.nd2	280.59	7185.3	13270.3	768.7	7	78.0087	1724.85	449	4095	11120101	585.935	9.12027	0	µm	488		134553
m5 005.nd2	1948.84	7189.69	14275.4	1068.2	1	62.6296	1095.45	381	2553	5670067	297.81	6.70079	0	µm	488		68607.8
m5 005.nd2	1948.84	7189.69	14275.4	1068.2	2	105.028	893.926	479	2076	7759278	206.071	4.13546	0	µm	488		93887.3
m5 005.nd2	1948.84	7189.69	14275.4	1068.2	3	79.6543	1094.95	401	3587	7208079	400.44	8.94514	0	µm	488		87217.8
m5 005.nd2	1948.84	7189.69	14275.4	1068.2	4	64.6503	1062.82	482	3627	5678665	307.008	7.5249	0	µm	488		68711.8
m5 005.nd2	1948.84	7189.69	14275.4	1068.2	5	64.1058	865.13	462	3018	4583460	230.956	6.53247	0	µm	488		55459.9
m5 005.nd2	1948.84	7189.69	14275.4	1068.2	6	90.6895	911.659	438	1839	6832884	238.619	4.00654	0	µm	488		82677.9
m5 005.nd2	1948.84	7189.69	14275.4	1068.2	7	51.1709	1195.41	329	2812	5055399	367.874	8.54711	0	µm	488		61170.3
m5 005.nd2	1948.84	7189.69	14275.4	1068.2	8	56.0109	981.626	370	4095	4543945	394.602	11.0676	0	µm	488		54981.7
m5 006.nd2	297.767	7204.94	13718.7	2357	1	77.6699	945.557	458	2437	6069530	233.41	5.32096	0	µm	488		73441.3
m5 006.nd2	297.767	7204.94	13718.7	2357	2	62.4602	851.311	446	2031	4394468	214.485	4.25786	0	µm	488		53173.1
m5 006.nd2	297.767	7204.94	13718.7	2357	3	41.2852	1344.38	518	4095	4587012	612.097	7.90541	0	µm	488		55502.8
m5 006.nd2	297.767	7204.94	13718.7	2357	4	76.3147	1277.59	639	3214	8057740	359.275	5.02973	0	µm	488		97498.7
m5 006.nd2	297.767	7204.94	13718.7	2357	5	21.78	1014.74	607	2290	1826535	220.177	3.77265	0	µm	488		22101.1
m5 006.nd2	297.767	7204.94	13718.7	2357	6	53.1795	1152.43	566	3262	5064939	348.983	5.76325	0	µm	488		61285.8
m5 006.nd2	297.767	7204.94	13718.7	2357	7	40.1599	818.831	411	1762	2717700	182.157	4.28711	0	µm	488		32884.2
m5 006.nd2	297.767	7204.94	13718.7	2357	8	81.2273	1372.19	497	4095	9211517	479.327	8.23944	0	µm	488		111459
m5 008.nd2	306.093	7205.78	13571.1	2357	1	50.8079	848.706	422	2188	3563716	193.071	5.18483	0	µm	488		43121
m5 008.nd2	306.093	7205.78	13571.1	2357	2	30.4678	991.219	446	1988	2495889	299.452	4.4574	0	µm	488		30200.3
m5 008.nd2	306.093	7205.78	13571.1	2357	3	130.849	1274.29	522	3741	13780176	429.776	6.96648	0	µm	488		166740
m5 008.nd2	306.093	7205.78	13571.1	2357	4	122.307	869.042	391	2277	8784273	202.843	5.15949	0	µm	488		106290
m5 008.nd2	306.093	7205.78	13571.1	2357	5	174.01	1702.65	460	4095	24485754	628.857	6.61551	0	µm	488		296278
m5 008.nd2	306.093	7205.78	13571.1	2357	6	58.4551	1174.35	518	2335	5673261	310.057	4.37266	0	µm	488		68646.5
m5 008.nd2	306.093	7205.78	13571.1	2357	7	67.9657	1468.22	532	4095	8246975	553.281	7.69737	0	µm	488		99788.4
m5 008.nd2	306.093	7205.78	13571.1	2357	8	100.684	1337.32	430	4095	11127804	559.115	9.52326	0	µm	488		134646
m5 008.nd2	306.093	7205.78	13571.1	2357	9	41.3094	1025.82	389	2662	3502150	399.12	6.84319	0	µm	488		42376
m5 008.nd2	306.093	7205.78	13571.1	2357	10	218.695	1504.45	493	4095	27191432	556.456	8.30629	0	µm	488		329016
m5 012.nd2	2098.34	7207.16	14138.1	3011.2	1	75.9396	1887.81	657	4095	11847916	778.544	5.7839	0	µm	488		143360
m5 012.nd2	2098.34	7207.16	14138.1	3011.2	2	42.8098	1576.25	320	4095	5576765	666.779	12.7969	0	µm	488		67478.9
m5 012.nd2	2098.34	7207.16	14138.1	3011.2	3	90.1813	1932.59	330	4095	14403616	753.907	12.4091	0	µm	488		174284
m5 012.nd2	2098.34	7207.16	14138.1	3011.2	4	72.5395	1488.24	702	3287	8922020	428.132	4.68234	0	µm	488		107956
m5 012.nd2	2098.34	7207.16	14138.1	3011.2	5	44.7337	1189.02	590	2825	4395825	324.385	4.78814	0	µm	488		53189.5
m5 012.nd2	2098.34	7207.16	14138.1	3011.2	6	141.776	1253.27	275	4095	14684591	452.734	13.4262	0	µm	488		177684
m5 012.nd2	2098.34	7207.16	14138.1	3011.2	7	117.491	1713.44	486	4095	16637455	584.898	7.40506	0	µm	488		201313
m5 013.nd2	297.683	7199.1	13062.7	2021.3	1	34.1583	1315.68	533	3313	3714153	546.062	6.21576	0	µm	488		44941.3
m5 013.nd2	297.683	7199.1	13062.7	2021.3	2	99.4741	1432.86	485	4095	11779568	408.62	8.4433	0	µm	488		142533
m5 013.nd2	297.683	7199.1	13062.7	2021.3	3	35.0416	1141.01	476	4095	3304372	366.118	8.60294	0	µm	488		39982.9
m5 013.nd2	297.683	7199.1	13062.7	2021.3	4	58.1768	1062.77	341	2685	5109800	303.538	7.58475	0	µm	488		61828.6
m5 013.nd2	297.683	7199.1	13062.7	2021.3	5	25.4705	1053.03	669	1960	2216635	236.813	2.92975	0	µm	488		26821.3
m5 013.nd2	297.683	7199.1	13062.7	2021.3	6	16.819	1477.92	428	4095	2054312	502.356	9.56776	0	µm	488		24857.2
m5 012.nd2	4193.08	7208.9	14507	3112.2	1	89.7215	1026.72	485	2363	7613110	242.833	4.87216	0	µm	488		92118.6
m5 012.nd2	4193.08	7208.9	14507	3112.2	2	102.136	1020.79	467	2364	8616475	291.94	4.89441	0	µm	488		104259
m5 012.nd2	4193.08	7208.9	14507	3112.2	3	75.1773	1434.81	550	3333	8914480	391.585	6.06	0	µm	488		107865
m5 012.nd2	4193.08	7208.9	14507	3112.2	4	146.821	1188.3	551	4095	14418828	366.661	6.94068	0	µm	488		174468
m5 012.nd2	4193.08	7208.9	14507	3112.2	5	73.1566	1073.96	571	2516	6493155	238.201	4.4063	0	µm	488		78567.2
m5 012.nd2	4193.08	7208.9	14507	3112.2	6	59.8708	1481.32	742	3659	7329572	425.345	4.93127	0	µm	488		88687.8
m5 012.nd2	4193.08	7208.9	14507	3112.2	7	90.145	1096.28	323	3945	8167278	402.207	12.2136	0	µm	488		98824.1
m5 012.nd2	4193.08	7208.9	14507	3112.2	8	60.4637	1461.54	764	3391	7303306	407.586	4.34187	0	µm	488		88370
m5 012.nd2	4193.08	7208.9	14507	3112.2	9	43.7415	1158.81	471	2944	4189083	370.356	6.25053	0	µm	488		50687.9
m5 012.nd2	6178.58	7207.89	14657.3	3067.7	1	93.4604	1238.02	384	4095	9562496	590.5	10.6641	0	µm	488		115706
m5 012.nd2	6178.58	7207.89	14657.3	3067.7	2	47.311	1174.8	605	2705	4593471	263.935	4.47107	0	µm	488		55581
m5 012.nd2	6178.58	7207.89	14657.3	3067.7	3	46.0042	1375.97	681	4095	5231445	414.058	6.01322	0	µm	488		63300.5
m5 012.nd2	6178.58	7207.89	14657.3	3067.7	4	89.8425	1170.33	418	3183	8689702	404.014	7.61483	0	µm	488		105145
m5 012.nd2	6178.58	7207.89	14657.3	3067.7	5	127.304	1408.49	384	4095	14818695	529.088	10.6641	0	µm	488		179306
m5 012.nd2	6178.58	7207.89	14657.3	3067.7	6	101.192	1314.22	455	4035	10990836	347.046	8.86813	0	µm	488		132989
m5 012.nd2	6178.58	7207.89	14657.3	3067.7	7	37.2801	1328.25	266	2496	4092336	372.107	9.38346	0	µm	488		49517.3
m5 012.nd2	6178.58	7207.89	14657.3	3067.7	8	73.2171	1582.46	767	3954	9575445	549.595	5.15515	0	µm	488		115863
m5 012.nd2	6178.58	7207.89	14657.3	3067.7	9	53.5425	1678.95	828	3955	7429354	568.449	4.77657	0	µm	488		89895.2
m5 012.nd2	6178.58	7207.89	14657.3	3067.7	10	35.9733	1572.32	389	4095	4674507	432.235	10.527	0	µm	488		56561.5
m5 012.nd2	8612.84	7201.83	13374	2260	1	18.029	1345.99	656	3452	2005523	398.919	5.2622	0	µm	488		24266.8
m5 012.nd2	8612.84	7201.83	13374	2260	2	19.8682	1047.12	592	1958	1719368	273.676	3.30743	0	µm	488		20804.4
m5 012.nd2	8612.84	7201.83	13374	2260	3	50.3481	900.94	445	1676	3748812	221.092	3.76629	0	µm	488		45360.6
m5 012.nd2	8612.84	7201.83	13374	2260	4	93.2547	854.202	348	2253	6583332	222.335	6.47414	0	µm	488		79658.3
m5 012.nd2	8612.84	7201.83	13374	2260	5	85.4502	1322.14	449	3281	9336918	380.453	6.28544	0	µm	488		112977
m5 012.nd2	8612.84	7201.83	13374	2260	6	86.7812	1394.01	466	3075	9997823	382.067	6.59871	0	µm	488		120974
m5 012.nd2	8612.84	7201.83	13374	2260	7	68.9216	1524.07	583	4095	8681113	510.058	7.02401	0	µm	488		105041
m5 012.nd2	8612.84	7201.83	13374	2260	8	37.2196	1048.9	575	2334	3226431	203.232	4.05913	0	µm	488		39039.8
m5 012.nd2	8612.84	7201.83	13374	2260	9	95.5779	1211.25	588	4095	9567698	480.886	6.75743	0	µm	488		115769
m5 012.nd2	8612.84	7201.83	13374	2260	10	66.3685	1463.06	656	3254	8024901	335.844	4.96037	0	µm	488		97101.3
m5 012.nd2	8612.84	7201.83	13374	2260	11	164.475	1605.27	581	4095	21820407	540.927	6.42857	0	µm	488		264027
m5 012.nd2	8612.84	7201.83	13374	2260	12	86.2125	1356.58	534	3344	9665624	401.435	5.98211	0	µm	488		116954
m5 015.nd2	292.812	7201.73	13088.4	2272.4	1	48.2185	900.42	374	1811	3588175	248.055	4.84225	0	µm	488		43416.9
m5 015.nd2	292.812	7201.73	13088.4	2272.4	2	63.6097	1019.58	499	2949	5359950	316.359	5.90982	0	µm	488		64855.4
m5 015.nd2	292.812	7201.73	13088.4	2272.4	3	144.91	1595.94	384	4095	19113026	615.008	9.70379	0	µm	488		231268
m5 015.nd2	292.812	7201.73	13088.4	2272.4	4	27.2008	1132.69	547	1956	2546283	364.326	3.57587	0	µm	488		30810
m5 015.nd2	292.812	7201.73	13088.4	2272.4	5	55.2002	1403.53	418	3523	6402919	490.884	8.42823	0	µm	488		77475.3
m5 015.nd2	292.812	7201.73	13088.4	2272.4	6	33.1661	788.498	493	1637	2161274	190.096	3.32049	0	µm	488		26151.4
m5 015.nd2	292.812	7201.73	13088.4	2272.4	7	18.5735	960.384	543	2088	1474190	267.231	3.8453	0	µm	488		17837.7
m5 015.nd2	292.812	7201.73	13088.4	2272.4	8	49.4648	1570.89	363	3059	6421783	539.235	8.11406	0	µm	488		77703.6
m5 015.nd2	292.812	7201.73	13088.4	2272.4	9	195.669	1499.76	487	4095	24252651	564.752	7.3917	0	µm	488		293457
m5 016.nd2	1934.67	7201.5	12929.5	2382.6	1	113.764	1389.09	329	3031	13060232	402.918	8.67477	0	µm	488		158029
m5 016.nd2	1934.67	7201.5	12929.5	2382.6	2	40.8254	1427.47	730	3088	4816285	352.293	4.23014	0	µm	488		58277
m5 016.nd2	1934.67	7201.5	12929.5	2382.6	3	167.573	1410.01	660	3534	19527184	398.673	5.09957	0	µm	488		236279
m5 016.nd2	1934.67	7201.5	12929.5	2382.6	4	61.4196	1589.66	775	3936	8069112	559.342	5.07871	0	µm	488		97636.3
m5 018.nd2	1936.22	7201.47	12674.2	2353.8	1	112.228	1311.82	583	2771	12167144	327.497	4.55008	0	µm	488		147222
m5 018.nd2	1936.22	7201.47	12674.2	2353.8	2	157.494	1098.61	528	2892	14299490	352.524	5.27737	0	µm	488		173024
m5 018.nd2	1936.22	7201.47	12674.2	2353.8	3	92.9764	1040.54	476	2091	7995499	246.311	3.93045	0	µm	488		96745.5
m5 018.nd2	1936.22	7201.47	12674.2	2353.8	4	172.679	1318.25	315	3844	18812743	396.092	12.2032	0	µm	488		227634
m5 018.nd2	1936.22	7201.47	12674.2	2353.8	5	23.6918	1187.6	544	2598	2325322	375.678	4.77574	0	µm	488		28136.4
m5 018.nd2	1936.22	7201.47	12674.2	2353.8	6	115.966	1282	466	3023	12286653	377.06	5.50638	0	µm	488		148669
m5 018.nd2	1936.22	7201.47	12674.2	2353.8	7	104.302	1281.06	535	3197	11042708	351.318	5.19859	0	µm	488		133617
m5 018.nd2	1936.22	7201.47	12674.2	2353.8	8	77.7546	1277.99	348	2675	8212345	379.009	7.39368	0	µm	488		99369.4
m5 018.nd2	1936.22	7201.47	12674.2	2353.8	9	172.244	1434.47	528	4095	20419663	547.855	6.91723	0	µm	488		247078
m5 021.nd2	1963.27	7178.76	10866.1	413.6	1	81.8565	1366.41	534	2722	9243769	391.508	4.40401	0	µm	488		111850
m5 021.nd2	1963.27	7178.76	10866.1	413.6	2	74.1367	1112.68	527	2514	6817415	303.332	4.57923	0	µm	488		82490.7
m5 021.nd2	1963.27	7178.76	10866.1	413.6	3	78.408	1075.87	416	2252	6971624	305.112	5.41346	0	µm	488		84356.7
m5 021.nd2	1963.27	7178.76	10866.1	413.6	4	234.183	1198.98	439	2738	23205148	318.029	5.12528	0	µm	488		280782
m5 021.nd2	1963.27	7178.76	10866.1	413.6	5	99.8855	1019.65	382	2918	8417197	298.335	7.48205	0	µm	488		101848
m5 021.nd2	1963.27	7178.76	10866.1	413.6	6	104.774	1088.1	311	2113	9421846	310.18	6.70794	0	µm	488		114004
m5 021.nd2	1963.27	7178.76	10866.1	413.6	7	90.5806	1114.17	393	2405	8340694	306.103	6.11959	0	µm	488		100922
m5 023.nd2	298.757	7187.81	12050.3	1305.5	1	131.37	949.305	268	2823	10306603	387.195	9.80208	0	µm	488		124710
m5 023.nd2	298.757	7187.81	12050.3	1305.5	2	78.166	904.696	412	1925	5844335	208.57	4.67233	0	µm	488		70716.5
m5 023.nd2	298.757	7187.81	12050.3	1305.5	3	51.9211	862.809	409	1969	3702313	236.547	4.81418	0	µm	488		44798
m5 023.nd2	298.757	7187.81	12050.3	1305.5	4	38.962	798.606	414	1625	2571512	183.163	3.92512	0	µm	488		31115.3
m5 023.nd2	298.757	7187.81	12050.3	1305.5	5	88.3905	944.201	495	4095	6897389	256.77	8.0137	0	µm	488		83458.4
m5 023.nd2	298.757	7187.81	12050.3	1305.5	6	93.6661	1397.92	686	4095	10821300	301.857	5.96939	0	µm	488		130938
m5 023.nd2	298.757	7187.81	12050.3	1305.5	7	70.422	1016.9	502	2495	5918355	257.81	4.22814	0	µm	488		71612.1
m5 023.nd2	298.757	7187.81	12050.3	1305.5	8	60.9235	933.574	498	3266	4700544	229.273	6.251	0	µm	488		56876.6
m5 023.nd2	298.757	7187.81	12050.3	1305.5	9	67.6027	1031.16	519	4095	5761093	339.897	7.56932	0	µm	488		69709.2
m5 023.nd2	298.757	7187.81	12050.3	1305.5	10	105.197	1432.45	562	2753	12453678	312.876	4.71352	0	µm	488		150690
m5 023.nd2	298.757	7187.81	12050.3	1305.5	11	40.3051	1099.58	533	3599	3662692	340.541	6.75235	0	µm	488		44318.6
m5 023.nd2	298.757	7187.81	12050.3	1305.5	12	59.0238	1006.96	464	2523	4911946	247.143	5.4375	0	µm	488		59434.5
m5 023.nd2	298.757	7187.81	12050.3	1305.5	13	71.9103	1099.79	610	2460	6536058	280.306	4.01961	0	µm	488		79086.3
m5 023.nd2	298.757	7187.81	12050.3	1305.5	14	83.1149	1097.11	490	3572	7536050	339.019	7.11554	0	µm	488		91186.2
m5 023.nd2	298.757	7187.81	12050.3	1305.5	15	46.5124	1179.32	320	3948	4533316	343.272	11.0899	0	µm	488		54853.1
m5 023.nd2	298.757	7187.81	12050.3	1305.5	16	91.9116	904.694	450	4095	6872052	285.92	8.32317	0	µm	488		83151.8
m5 023.nd2	298.757	7187.81	12050.3	1305.5	17	75.0926	1038.11	565	2542	6442490	242.349	3.98938	0	µm	488		77954.1
m5 023.nd2	298.757	7187.81	12050.3	1305.5	18	67.9294	1282.43	361	3765	7199558	432.164	10.4294	0	µm	488		87114.7
m5 023.nd2	298.757	7187.81	12050.3	1305.5	19	93.6903	1243	622	4095	9624540	376.643	6.5836	0	µm	488		116457
																	97311
