# Supplementary material for: Aurora kinase A promotes trained immunity via regulation of endogenous S-adenosylmethionine metabolism
Source: eLife journal article supplement (doi:10.7554/elife.104138), 2025-01-08
Supplement: fig6-data1 [file m6.xlsx]

## Sheet: ROI Statistics
FileName	Time (ms)	Z Pos	X Pos	Y Pos	ROI ID	ROI Area [µm²]	ROI Mean Intensity	ROI Min Intensity	ROI Max Intensity	ROI Sum Intensity	ROI StDev Intensity	ROI Signal/Background	Area Fraction	Unit	Channel
m6 001.nd2	1882.62	6782.52	-10187.8	4331.4	1	39.1435	787.691	309	3814	2548179	399.532	12.343	0	µm	488		30833
m6 001.nd2	1882.62	6782.52	-10187.8	4331.4	2	55.3212	661.739	241	2351	3025471	203.75	7.01968	0	µm	488		36608.2
m6 001.nd2	1882.62	6782.52	-10187.8	4331.4	3	37.3406	870.138	302	2260	2685246	307.954	7.48344	0	µm	488		32491.5
m6 001.nd2	1882.62	6782.52	-10187.8	4331.4	4	94.9487	962.595	324	3065	7553484	339.115	9.45988	0	µm	488		91397.2
m6 002.nd2	1677.64	6785.01	-10780.6	993.9	1	56.2408	740.656	268	4095	3442567	318.451	15.2799	0	µm	488		41655.1
m6 002.nd2	1677.64	6785.01	-10780.6	993.9	2	53.2037	700.26	315	2065	3079045	242.46	6.55556	0	µm	488		37256.4
m6 002.nd2	1677.64	6785.01	-10780.6	993.9	3	105.827	924.646	357	2722	8086950	324.969	6.97949	0	µm	488		97852.1
m6 002.nd2	1677.64	6785.01	-10780.6	993.9	4	53.9781	759.881	347	2013	3389831	237.45	5.76791	0	µm	488		41017
m6 002.nd2	1677.64	6785.01	-10780.6	993.9	5	58.9754	890.635	359	2624	4340957	255.36	7.30919	0	µm	488		52525.6
m6 002.nd2	1677.64	6785.01	-10780.6	993.9	6	38.6353	685.713	302	1569	2189482	173.753	5.19536	0	µm	488		26492.7
m6 002.nd2	1677.64	6785.01	-10780.6	993.9	7	37.1833	597.395	321	1805	1835796	164.451	5.62305	0	µm	488		22213.1
m6 002.nd2	1677.64	6785.01	-10780.6	993.9	8	54.5831	591.637	266	2512	2668874	195.398	9.44361	0	µm	488		32293.4
m6 002.nd2	1677.64	6785.01	-10780.6	993.9	9	106.069	667.959	279	2353	5855331	210.906	7.39937	0	µm	488		70849.5
m6 002.nd2	1677.64	6785.01	-10780.6	993.9	10	29.9717	574.65	332	2227	1423409	204.522	6.70783	0	µm	488		17223.2
m6 002.nd2	1677.64	6785.01	-10780.6	993.9	11	57.6686	624.726	269	1497	2977446	193.109	5.56506	0	µm	488		36027.1
m6 002.nd2	1677.64	6785.01	-10780.6	993.9	12	50.1182	400.871	220	941	1660406	104.378	4.27727	0	µm	488		20090.9
m6 002.nd2	1677.64	6785.01	-10780.6	993.9	13	63.0894	588.936	265	1600	3070710	148.102	6.03774	0	µm	488		37155.6
m6 002.nd2	1677.64	6785.01	-10780.6	993.9	14	26.9951	393.692	223	881	878327	88.3902	3.95067	0	µm	488		10627.8
m6 002.nd2	1677.64	6785.01	-10780.6	993.9	15	126.094	512.653	261	1306	5342359	133.064	4.80147	0	µm	488		64642.5
m6 002.nd2	1677.64	6785.01	-10780.6	993.9	16	80.7796	520.896	257	1299	3477503	141.657	4.84701	0	µm	488		42077.8
m6 002.nd2	1677.64	6785.01	-10780.6	993.9	17	56.0593	744.767	352	1494	3450507	192.02	4.24432	0	µm	488		41751.1
m6 002.nd2	1677.64	6785.01	-10780.6	993.9	18	59.5199	542.972	268	1553	2670878	171.584	5.79478	0	µm	488		32317.6
m6 002.nd2	1677.64	6785.01	-10780.6	993.9	19	74.0157	569.906	281	1539	3486116	143.443	5.47687	0	µm	488		42182
m6 002.nd2	3752.99	6785.01	-10754.9	1210.7	1	97.1267	551.144	254	1404	4424032	179.172	5.52756	0	µm	488		53530.8
m6 002.nd2	3752.99	6785.01	-10754.9	1210.7	2	71.8014	526.531	255	1370	3124436	146.639	5.37255	0	µm	488		37805.7
m6 002.nd2	3752.99	6785.01	-10754.9	1210.7	3	115.047	644.952	253	3243	6132203	237.031	12.1007	0	µm	488		74199.7
m6 002.nd2	3752.99	6785.01	-10754.9	1210.7	4	151.819	927.889	328	4000	11642226	367.799	9.47734	0	µm	488		140871
m6 002.nd2	3752.99	6785.01	-10754.9	1210.7	5	52.5624	537.967	258	1874	2336928	202.649	7.26357	0	µm	488		28276.8
m6 002.nd2	3752.99	6785.01	-10754.9	1210.7	6	117.527	988.852	342	3707	9604724	335.212	10.8392	0	µm	488		116217
m6 002.nd2	3752.99	6785.01	-10754.9	1210.7	7	62.3876	609.516	239	2263	3142663	259.804	9.46862	0	µm	488		38026.2
m6 002.nd2	3752.99	6785.01	-10754.9	1210.7	8	53.603	728.93	308	2950	3229159	261.853	9.57792	0	µm	488		39072.8
m6 002.nd2	3752.99	6785.01	-10754.9	1210.7	9	65.1464	799.582	329	2578	4304950	269.095	7.83587	0	µm	488		52089.9
m6 002.nd2	3752.99	6785.01	-10754.9	1210.7	10	72.5032	607.745	170	3143	3641608	246.401	18.4882	0	µm	488		44063.5
m6 002.nd2	3752.99	6785.01	-10754.9	1210.7	11	71.8256	779.193	334	4095	4625289	328.263	11.4385	0	µm	488		55966
m6 002.nd2	3752.99	6785.01	-10754.9	1210.7	12	72.0313	1112.83	393	4095	6624673	374.67	7.88722	0	µm	488		80158.5
m6 002.nd2	3752.99	6785.01	-10754.9	1210.7	13	54.7404	800.886	325	2678	3623209	328.525	8.24	0	µm	488		43840.8
m6 002.nd2	3752.99	6785.01	-10754.9	1210.7	14	24.0669	620.703	318	1778	1234578	190.868	5.59119	0	µm	488		14938.4
m6 002.nd2	3752.99	6785.01	-10754.9	1210.7	15	76.2179	827.714	353	2418	5213770	301.859	6.56374	0	µm	488		63086.6
m6 002.nd2	3752.99	6785.01	-10754.9	1210.7	16	106.686	754.706	297	3023	6654243	241.595	10.0432	0	µm	488		80516.3
m6 002.nd2	3752.99	6785.01	-10754.9	1210.7	17	99.4257	768.886	328	2588	6317933	259.548	7.89024	0	µm	488		76447
m6 002.nd2	3752.99	6785.01	-10754.9	1210.7	18	64.1542	787.077	206	3703	4173080	305.42	17.9757	0	µm	488		50494.3
m6 002.nd2	3752.99	6785.01	-10754.9	1210.7	19	113.183	584.874	253	1333	5470916	168.894	4.83525	0	µm	488		66198.1
m6 002.nd2	3752.99	6785.01	-10754.9	1210.7	20	57.6444	598.317	229	1960	2850382	198.068	8.55895	0	µm	488		34489.6
m6 002.nd2	3752.99	6785.01	-10754.9	1210.7	21	69.0305	742.523	284	3365	4236095	303.678	11.1794	0	µm	488		51256.7
m6 002.nd2	6985.47	6783.87	-10391.7	4123.5	1	73.3381	821.853	271	3153	4981249	298.195	11.6347	0	µm	488		60273.1
m6 002.nd2	6985.47	6783.87	-10391.7	4123.5	2	32.3554	758.665	251	2322	2028669	285.681	9.251	0	µm	488		24546.9
m6 002.nd2	9120.98	6783.87	-10459.7	4660.2	1	51.3645	519.152	241	1731	2203802	162.817	7.18257	0	µm	488		26666
m6 002.nd2	9120.98	6783.87	-10459.7	4660.2	2	50.9168	787.385	231	2347	3313316	280.003	10.1602	0	µm	488		40091.1
m6 002.nd2	9120.98	6783.87	-10459.7	4660.2	3	100.333	682.269	239	3018	5657371	252.415	9.46043	0	µm	488		68454.2
m6 002.nd2	9120.98	6783.87	-10459.7	4660.2	4	72.5274	824.886	265	4095	4944369	324.178	14.1207	0	µm	488		59826.9
m6 002.nd2	9120.98	6783.87	-10459.7	4660.2	5	31.9319	900.986	465	1805	2377701	227.469	3.88172	0	µm	488		28770.2
m6 002.nd2	9120.98	6783.87	-10459.7	4660.2	6	20.933	496.991	284	2357	859795	202.15	8.2993	0	µm	488		10403.5
m6 002.nd2	9120.98	6783.87	-10459.7	4660.2	7	15.8147	600.725	217	1450	785148	176.178	6.68203	0	µm	488		9500.29
m6 002.nd2	9120.98	6783.87	-10459.7	4660.2	8	98.5666	748.213	242	2693	6094942	257.058	11.1281	0	µm	488		73748.8
m6 002.nd2	11199.7	6784.29	-10338.8	4954.8	1	47.4683	547.041	244	3368	2146042	230.904	13.8033	0	µm	488		25967.1
m6 002.nd2	11199.7	6784.29	-10338.8	4954.8	2	59.3384	849.425	368	2410	4165580	271.102	6.25974	0	µm	488		50403.5
m6 002.nd2	11199.7	6784.29	-10338.8	4954.8	3	47.5288	598.347	263	1357	2350306	192.64	5.1597	0	µm	488		28438.7
m6 002.nd2	11199.7	6784.29	-10338.8	4954.8	4	63.6339	453.307	216	1551	2383941	167.598	6.66667	0	µm	488		28845.7
m6 002.nd2	11199.7	6784.29	-10338.8	4954.8	5	40.9948	685.949	317	2337	2323996	261.85	7.28037	0	µm	488		28120.4
m6 002.nd2	11199.7	6784.29	-10338.8	4954.8	6	33.0209	815.055	310	4095	2224286	365.665	13.2097	0	µm	488		26913.9
m6 002.nd2	11199.7	6784.29	-10338.8	4954.8	7	16.4802	743.642	380	1843	1012841	225.369	4.85	0	µm	488		12255.4
m6 002.nd2	11199.7	6784.29	-10338.8	4954.8	8	29.3546	435.212	236	976	1055824	118.519	4.13559	0	µm	488		12775.5
m6 002.nd2	11199.7	6784.29	-10338.8	4954.8	9	61.4075	643.813	238	1883	3267352	207.404	7.91176	0	µm	488		39535
m6 002.nd2	11199.7	6784.29	-10338.8	4954.8	10	31.0365	664.026	199	1741	1703227	208.653	8.74874	0	µm	488		20609
m6 002.nd2	11199.7	6784.29	-10338.8	4954.8	11	67.276	616.737	252	4095	3429056	243.684	16.25	0	µm	488		41491.6
m6 002.nd2	11199.7	6784.29	-10338.8	4954.8	12	25.7367	468.868	261	1308	997282	137.388	5.01149	0	µm	488		12067.1
m6 002.nd2	13369	6784.01	-10316.5	5179.5	1	82.5099	719.931	278	1803	4909207	234.3	6.05034	0	µm	488		59401.4
m6 002.nd2	13369	6784.01	-10316.5	5179.5	2	62.0004	694.499	285	2254	3558611	222.982	7.1614	0	µm	488		43059.2
m6 002.nd2	13369	6784.01	-10316.5	5179.5	3	43.5479	673.637	286	1565	2424419	217.447	5.47203	0	µm	488		29335.5
m6 002.nd2	13369	6784.01	-10316.5	5179.5	4	41.5998	721.57	286	1755	2480759	218.755	6.13636	0	µm	488		30017.2
m6 002.nd2	13369	6784.01	-10316.5	5179.5	5	57.6928	455.821	217	1785	2173354	179.103	8.22581	0	µm	488		26297.6
m6 002.nd2	13369	6784.01	-10316.5	5179.5	6	40.7044	589.239	263	2669	1982200	251.199	10.1483	0	µm	488		23984.6
m6 002.nd2	13369	6784.01	-10316.5	5179.5	7	43.1365	569.225	269	1582	2029287	188.481	5.88104	0	µm	488		24554.4
m6 002.nd2	13369	6784.01	-10316.5	5179.5	8	94.0291	698.153	266	1813	5425348	228.425	5.94203	0	µm	488		65646.7
m6 002.nd2	13369	6784.01	-10316.5	5179.5	9	61.2986	545.981	239	1498	2765938	191.266	6.26778	0	µm	488		33467.8
m6 002.nd2	13369	6784.01	-10316.5	5179.5	10	56.3981	776.547	285	2861	3619487	290.911	9.47351	0	µm	488		43795.8
m6 002.nd2	13369	6784.01	-10316.5	5179.5	11	38.9741	599.063	287	1413	1929581	140.568	4.92335	0	µm	488		23347.9
m6 002.nd2	13369	6784.01	-10316.5	5179.5	12	63.8033	748.488	276	1836	3946775	283.457	6.55714	0	µm	488		47756
m6 002.nd2	13369	6784.01	-10316.5	5179.5	13	77.4279	875.046	309	4095	5599418	321.171	12.5613	0	µm	488		67753
m6 002.nd2	13369	6784.01	-10316.5	5179.5	14	63.5976	977.234	300	3397	5136340	430.742	9.81333	0	µm	488		62149.7
m6 002.nd2	13369	6784.01	-10316.5	5179.5	15	60.5605	862.575	395	2598	4317186	315.532	6.4788	0	µm	488		52238
m6 002.nd2	13369	6784.01	-10316.5	5179.5	16	38.8652	635.88	171	2367	2042448	284.266	13.8421	0	µm	488		24713.6
m6 002.nd2	13369	6784.01	-10316.5	5179.5	17	72.0555	659.796	309	2028	3929084	182.35	6.5209	0	µm	488		47541.9
m6 002.nd2	13369	6784.01	-10316.5	5179.5	18	44.3828	608.172	255	1493	2230774	183.361	5.8549	0	µm	488		26992.4
m6 002.nd2	13369	6784.01	-10316.5	5179.5	19	37.5463	651.81	347	1774	2022566	183.455	5.11239	0	µm	488		24473
m6 002.nd2	13369	6784.01	-10316.5	5179.5	20	67.8931	755.019	307	1789	4236413	239.646	5.69745	0	µm	488		51260.6
m6 002.nd2	13369	6784.01	-10316.5	5179.5	21	63.4645	530.108	230	3002	2780415	276.675	13.0522	0	µm	488		33643
m6 002.nd2	13369	6784.01	-10316.5	5179.5	22	41.7087	548.621	249	1216	1891095	144.737	4.88353	0	µm	488		22882.2
m6 002.nd2	13369	6784.01	-10316.5	5179.5	23	57.9711	585.203	202	1630	2803708	190.053	7.44292	0	µm	488		33924.9
m6 002.nd2	15714.1	6784.83	-9289.8	5087.2	1	49.3196	601.019	263	1303	2449754	167.091	4.79044	0	µm	488		29642
m6 002.nd2	15714.1	6784.83	-9289.8	5087.2	2	89.9393	522.735	195	1395	3885488	150.619	7.15385	0	µm	488		47014.4
m6 002.nd2	15714.1	6784.83	-9289.8	5087.2	3	66.8404	475.551	232	1351	2626945	136.266	5.82328	0	µm	488		31786
m6 002.nd2	15714.1	6784.83	-9289.8	5087.2	4	77.0528	569.72	174	1577	3627978	182.925	8.3	0	µm	488		43898.5
m6 002.nd2	15714.1	6784.83	-9289.8	5087.2	5	107.617	741.501	244	2242	6594910	220.904	8.89682	0	µm	488		79798.4
m6 002.nd2	15714.1	6784.83	-9289.8	5087.2	6	19.2027	437.138	209	803	693738	85.9435	3.84211	0	µm	488		8394.23
m6 002.nd2	15714.1	6784.83	-9289.8	5087.2	7	25.4584	847.463	343	1745	1783062	290.324	5.08746	0	µm	488		21575.1
m6 002.nd2	15714.1	6784.83	-9289.8	5087.2	8	12.8744	822.681	344	1694	875333	244.211	4.92442	0	µm	488		10591.5
m6 002.nd2	15714.1	6784.83	-9289.8	5087.2	9	64.009	590.914	239	1908	3125937	233.268	7.48235	0	µm	488		37823.8
m6 002.nd2	15714.1	6784.83	-9289.8	5087.2	10	33.7832	568.126	263	1234	1586209	140.291	4.69201	0	µm	488		19193.1
m6 002.nd2	15714.1	6784.83	-9289.8	5087.2	11	82.7277	811.542	268	2425	5548516	292.366	9.04851	0	µm	488		67137
m6 002.nd2	17928.9	6782.92	-8582.3	5046.5	1	70.6035	635.976	280	3208	3710922	214.542	11.4571	0	µm	488		44902.2
m6 002.nd2	17928.9	6782.92	-8582.3	5046.5	2	70.4825	496.202	227	1153	2890377	136.711	4.68699	0	µm	488		34973.6
m6 002.nd2	17928.9	6782.92	-8582.3	5046.5	3	89.0197	489.429	235	1354	3600729	121.92	5.7617	0	µm	488		43568.8
m6 002.nd2	17928.9	6782.92	-8582.3	5046.5	4	66.6589	639.344	240	4095	3522145	269.328	17.0625	0	µm	488		42618
m6 002.nd2	17928.9	6782.92	-8582.3	5046.5	5	93.5814	685.434	260	4095	5301143	349.516	15.75	0	µm	488		64143.8
m6 002.nd2	17928.9	6782.92	-8582.3	5046.5	6	57.6686	604.487	280	4095	2880983	243.855	14.2683	0	µm	488		34859.9
m6 002.nd2	17928.9	6782.92	-8582.3	5046.5	7	36.6146	831.691	370	1860	2516696	231.221	5.02703	0	µm	488		30452
m6 002.nd2	17928.9	6782.92	-8582.3	5046.5	8	25.2406	927.47	237	2360	1934702	362.616	9.95781	0	µm	488		23409.9
m6 002.nd2	17928.9	6782.92	-8582.3	5046.5	9	54.0628	597.2	283	1598	2668289	173.236	5.64664	0	µm	488		32286.3
m6 002.nd2	20423.2	6782.52	-9978.5	4301.9	1	42.5436	841.932	249	2878	2960233	338.072	11.5582	0	µm	488		35818.8
m6 002.nd2	22459.4	6782.52	-10187.7	4331.9	1	41.2247	873.677	225	2363	2976617	282.86	10.5022	0	µm	488		36017.1
m6 002.nd2	22459.4	6782.52	-10187.7	4331.9	2	43.3785	759.43	343	2636	2722555	296.468	7.68513	0	µm	488		32942.9
m6 002.nd2	22459.4	6782.52	-10187.7	4331.9	3	32.6942	679.005	265	2308	1834672	237.53	8.2724	0	µm	488		22199.5
m6 006.nd2	154.344	6773.42	10588.3	1809.8	1	60.6815	1318.64	377	4095	6612966	608.049	10.8621	0	µm	488		80016.9
m6 006.nd2	154.344	6773.42	10588.3	1809.8	2	94.138	1234.97	526	4095	9608051	376.238	7.24779	0	µm	488		116257
m6 006.nd2	154.344	6773.42	10588.3	1809.8	3	74.052	1474.92	400	3311	9026503	430.778	8.2775	0	µm	488		109221
m6 006.nd2	154.344	6773.42	10588.3	1809.8	4	94.8035	1567.67	253	4095	12282714	680.899	14.47	0	µm	488		148621
m6 007.nd2	141.451	6773.42	10570.2	1668.5	1	73.205	1407.84	510	4095	8517425	523.868	8.02941	0	µm	488		103061
m6 007.nd2	141.451	6773.42	10570.2	1668.5	2	84.2886	1261.07	428	3019	8784618	443.204	7.05374	0	µm	488		106294
m6 007.nd2	141.451	6773.42	10570.2	1668.5	3	108.622	1248.7	281	4095	11209606	577.852	14.573	0	µm	488		135636
m6 007.nd2	141.451	6773.42	10570.2	1668.5	4	74.1367	1364.03	208	4095	8357434	487.772	19.6875	0	µm	488		101125
m6 007.nd2	141.451	6773.42	10570.2	1668.5	5	55.3212	1185.78	476	4036	5421376	505.389	8.32165	0	µm	488		65598.6
m6 007.nd2	141.451	6773.42	10570.2	1668.5	6	60.1007	1043.41	218	3335	5182622	424.167	15.0905	0	µm	488		62709.7
m6 007.nd2	141.451	6773.42	10570.2	1668.5	7	53.5667	1227.3	414	4095	5433247	460.217	9.8913	0	µm	488		65742.3
m6 007.nd2	141.451	6773.42	10570.2	1668.5	8	66.0176	951.88	378	3239	5193459	275.78	7.60329	0	µm	488		62840.9
m6 007.nd2	141.451	6773.42	10570.2	1668.5	9	63.1862	951.254	287	3815	4967447	385.963	13.2927	0	µm	488		60106.1
m6 008.nd2	149.071	6773.27	10414.6	1534.5	1	58.6003	1137.79	177	3577	5510308	535.807	20.209	0	µm	488		66674.7
m6 008.nd2	149.071	6773.27	10414.6	1534.5	2	55.2002	1233.44	379	2624	5626973	317.642	6.92348	0	µm	488		68086.4
m6 008.nd2	149.071	6773.27	10414.6	1534.5	3	83.6836	907.379	217	4095	6275436	308.375	12.9493	0	µm	488		75932.8
m6 008.nd2	149.071	6773.27	10414.6	1534.5	4	112.336	1234.78	241	3336	11463691	428.157	13.8423	0	µm	488		138711
m6 008.nd2	149.071	6773.27	10414.6	1534.5	5	58.6971	1261.94	246	4095	6121684	464.121	12.8618	0	µm	488		74072.4
m6 008.nd2	149.071	6773.27	10414.6	1534.5	6	59.8345	1369.94	452	4095	6774347	421.54	9.05973	0	µm	488		81969.6
m6 008.nd2	149.071	6773.27	10414.6	1534.5	7	65.4368	1074.38	248	3046	5810262	405.25	11.7606	0	µm	488		70304.2
m6 008.nd2	149.071	6773.27	10414.6	1534.5	8	85.1356	954.792	320	4095	6717915	394.667	11.5028	0	µm	488		81286.8
m6 008.nd2	149.071	6773.27	10414.6	1534.5	9	72.1644	1040.54	173	4095	6205763	518.112	23.6705	0	µm	488		75089.7
m6 009.nd2	157.734	6772.67	10273.1	1310.1	1	58.1768	1494.61	607	3977	7186069	575.564	6.5519	0	µm	488		86951.4
m6 009.nd2	157.734	6772.67	10273.1	1310.1	2	66.0902	1203.79	217	4095	6575097	625.371	18.871	0	µm	488		79558.7
m6 009.nd2	157.734	6772.67	10273.1	1310.1	3	65.5699	1395.32	415	4095	7561255	620.624	9.86747	0	µm	488		91491.2
m6 009.nd2	157.734	6772.67	10273.1	1310.1	4	58.806	1145.42	349	2934	5566745	337.529	8.40688	0	µm	488		67357.6
m6 009.nd2	157.734	6772.67	10273.1	1310.1	5	56.2892	1386.83	518	3687	6451529	470.594	7.11776	0	µm	488		78063.5
m6 009.nd2	157.734	6772.67	10273.1	1310.1	6	57.1967	693.417	312	2600	3277780	270.633	8.33333	0	µm	488		39661.1
m6 010.nd2	142.385	6772.89	10320.2	1167.7	1	63.1862	1197.04	431	3607	6250953	477.3	8.05134	0	µm	488		75636.5
m6 010.nd2	142.385	6772.89	10320.2	1167.7	2	95.8925	871.655	181	3081	6907865	366.737	15.3284	0	µm	488		83585.2
m6 010.nd2	142.385	6772.89	10320.2	1167.7	3	57.0757	1108.38	405	2995	5228206	411.074	7.14797	0	µm	488		63261.3
m6 010.nd2	142.385	6772.89	10320.2	1167.7	4	65.4247	1015.16	184	4095	5488994	475.369	22.2554	0	µm	488		66416.8
m6 010.nd2	142.385	6772.89	10320.2	1167.7	5	66.9009	1100.49	182	3047	6084592	472.516	16.7418	0	µm	488		73623.6
m6 010.nd2	142.385	6772.89	10320.2	1167.7	6	47.2263	983.202	268	3607	3837439	411.561	13.459	0	µm	488		46433
m6 010.nd2	142.385	6772.89	10320.2	1167.7	7	67.639	1082.6	221	3667	6051748	458.5	16.5928	0	µm	488		73226.2
m6 010.nd2	142.385	6772.89	10320.2	1167.7	8	42.5315	1192.07	296	4095	4190122	487.59	13.8345	0	µm	488		50700.5
m6 011.nd2	141.779	6772.56	10823.5	861.5	1	67.7358	1114.42	268	3054	6238547	474.764	11.3955	0	µm	488		75486.4
m6 011.nd2	141.779	6772.56	10823.5	861.5	2	77.8393	855.981	149	2643	5506524	324.466	17.7383	0	µm	488		66628.9
m6 011.nd2	141.779	6772.56	10823.5	861.5	3	82.5825	868.334	224	2660	5926380	357.194	11.875	0	µm	488		71709.2
m6 011.nd2	141.779	6772.56	10823.5	861.5	4	107.037	1125.31	335	4095	9954529	473.598	11.8012	0	µm	488		120450
m6 011.nd2	141.779	6772.56	10823.5	861.5	5	58.6487	876.213	289	2088	4247004	304.482	6.64968	0	µm	488		51388.7
m6 011.nd2	141.779	6772.56	10823.5	861.5	6	88.7535	962.085	362	3370	7056890	411.413	9.0107	0	µm	488		85388.4
m6 011.nd2	141.779	6772.56	10823.5	861.5	7	88.1122	824.886	193	3362	6006822	292.949	16.2415	0	µm	488		72682.5
m6 012.nd2	142.821	6771.9	10832.5	1002	1	101.083	960.614	226	4095	8024967	442.625	16.38	0	µm	488		97102.1
m6 012.nd2	142.821	6771.9	10832.5	1002	2	108.537	1054.02	240	3500	9454533	484.976	12.1107	0	µm	488		114400
m6 012.nd2	142.821	6771.9	10832.5	1002	3	73.0719	1347.24	479	4095	8135960	504.514	8.54906	0	µm	488		98445.1
m6 012.nd2	142.821	6771.9	10832.5	1002	4	89.2496	972.554	189	4095	7173558	428.259	19.8786	0	µm	488		86800.1
m6 012.nd2	142.821	6771.9	10832.5	1002	5	70.2526	1022.96	434	3960	5939284	409.22	8.93905	0	µm	488		71865.3
m6 012.nd2	142.821	6771.9	10832.5	1002	6	122.283	1073.87	216	2895	10852579	385.347	13.4028	0	µm	488		131316
m6 012.nd2	142.821	6771.9	10832.5	1002	7	81.7476	1223.99	178	3411	8269256	477.241	19.1629	0	µm	488		100058
m6 013.nd2	149.945	6771.64	11165	991	1	42.2774	894.769	264	4095	3126324	570.072	15.5114	0	µm	488		37828.5
m6 013.nd2	149.945	6771.64	11165	991	2	61.5648	756.461	245	3528	3848875	364.042	14.4	0	µm	488		46571.4
m6 013.nd2	149.945	6771.64	11165	991	3	81.5782	673.319	230	3646	4539515	330.931	14.7016	0	µm	488		54928.1
m6 013.nd2	149.945	6771.64	11165	991	4	45.8832	639.646	343	3118	2425537	234.518	8.88319	0	µm	488		29349
m6 013.nd2	149.945	6771.64	11165	991	5	39.2282	702.373	230	1998	2277093	233.665	8.68696	0	µm	488		27552.8
m6 013.nd2	149.945	6771.64	11165	991	6	128.792	844.795	233	2652	8992003	328.205	9.53957	0	µm	488		108803
m6 013.nd2	149.945	6771.64	11165	991	7	85.6801	808.07	271	3380	5721941	356.063	11.3423	0	µm	488		69235.5
m6 013.nd2	149.945	6771.64	11165	991	8	62.9805	767.965	244	2783	3997258	307.8	10.7452	0	µm	488		48366.8
m6 014.nd2	151.671	6770.51	11197.1	2823.5	1	37.1349	746.079	275	3509	2289715	354.449	12.76	0	µm	488		27705.6
m6 014.nd2	151.671	6770.51	11197.1	2823.5	2	57.1846	719.938	203	2375	3402429	242.04	9.85477	0	µm	488		41169.4
m6 014.nd2	151.671	6770.51	11197.1	2823.5	3	87.1079	924.477	244	3250	6655313	400.764	13.3197	0	µm	488		80529.3
m6 014.nd2	151.671	6770.51	11197.1	2823.5	4	68.8732	822.133	248	3608	4679579	416.895	14.5484	0	µm	488		56622.9
m6 015.nd2	169.162	6768.55	12674.1	3984	1	30.6977	1069.46	376	3551	2713229	449.427	9.44415	0	µm	488		32830.1
m6 015.nd2	169.162	6768.55	12674.1	3984	2	119.088	1302.62	242	3675	12820382	539.827	13.764	0	µm	488		155127
m6 015.nd2	169.162	6768.55	12674.1	3984	3	57.3661	977.649	326	2140	4635036	263.546	5.94444	0	µm	488		56083.9
m6 015.nd2	169.162	6768.55	12674.1	3984	4	99.3773	715.613	212	2108	5877333	263.501	9.9434	0	µm	488		71115.7
																	54832.3
