# Supplementary material for: Aurora kinase A promotes trained immunity via regulation of endogenous S-adenosylmethionine metabolism
Source: eLife. 2025 Sep 8;14:RP104138. doi: 10.7554/eLife.104138 (PMC12416886; doi:10.7554/eLife.104138)
Supplement: Source data 1. [file elife-104138-data1.xlsx]

## Sheet: Figure 1
Fig. 1A
		β-glucan
Ali (μM)	0	92.9346	118.343	84.0418	107.788	96.7133
	0.25	118.538	114.271	104.564	98.7329	101.436
	0.5	111.013	97.4625	112.642	106.257	92.0551
	1	117.821	108.049	120.623	114.597	96.4201
Fig. 1B
	IL-6	Vehicle				β-glucan
Ali (μM)	0	792.403	891.702	782.667		1795.42	2188.57	1958.94
	0.5	1084.31	1162.89	895.804		902.311	929.962	1198.26
	1	838.286	851.096	730.376		645.014	568.699	505.298
	TNF	Vehicle				β-glucan
Ali (μM)	0	887.296	795.41	841.953		1657.22	2038.38	1880.63
	0.5	1074.54	1182.94	886.22		824.417	861.516	696.576
	1	711.234	675.673	715.524		430.778	462.791	549.481
Fig. 1C
	Tnf	Vehicle				β-glucan
Ali (μM)	0	1	1	1		2.0467	3	2.90588
	0.5	0.950409	0.956979	0.763845		1.37879	1.10303	1.53503
	1	0.903403	0.897062	0.718014		1.03144	1.00421	0.721463
	Il6	Vehicle				β-glucan
Ali (μM)	0	1	1	1		2.27591	3.124679	2.49683
	0.5	1.07415	0.94082	0.71567		0.707358	0.67974	0.88
	1	0.601687	0.537937	0.44		0.553631	0.49	0.5108
Fig.1F
	IL-6
	siScr	siScr	siAurka#1	siAurka#1
β-glucan	-	+	+	+
	1342.41	3300.01	1604.57	2564.84
	1332.57	3547.54	1751.42	2597.42
	1303.2	4077.23	1757.91	2691.05
	TNF
	siScr	siScr	siAurka#1	siAurka#1
β-glucan	-	+	+	+
	1667.41	2852.86	1591.01	2244.12
	1696.98	2670.49	1470.24	2182.5
	1701.91	2685.27	1467.78	2128.28
Fig. 1G
	IL-6						IL-6
β-glucan	-	+	+	+		β-glucan	-	+	+	+
	siScr	siScr	siAurka#1	siAurka#1		Ali (μM)	0	0	0.5	1
	68.2354	99.1383	60.8977	76.8016			209.699	912.957	600.105	412.462
	72.831	98.7469	67.7523	61.9421			226.04	699.597	625.96	490.039
	66.4728	93.8362	69.8587	77.5835			227.298	914.497	620.745	467
	TNF						TNF
β-glucan	-	+	+	+		β-glucan	-	+	+	+
	siScr	siScr	siAurka#1	siAurka#1		Ali (μM)	0	0	0.5	1
	254.201	304.258	247.249	256.982			47.2581	212.927	185.846	167.262
	254.201	316.772	262.867	238.906			47.2581	218.768	194.873	172.041
	218.049	330.563	263.935	226.392			44.6032	232.043	180.537	164.076
Fig. 1H
	IL-6
β-glucan	-	+	+
Ali	-	-	+
	1375.18	2198.7	1740.74
	1634.23	2056.36	1875.96
	1492.13	2080.46	1557.23
	TNF
β-glucan	-	+	+
Ali	-	-	+
	360.723	562.342	393.511
	444.899	565.169	413.455
	397.85	484.335	345.059

## Sheet: Figure 1_figure supplement 1
Figure 1-figure supplement 1D
inhibitor	-	-	Tozasertib	Alisertib	MLN8054
	668.204	1491.67	1269.02	1185.32	1158.23
	959.694	1723.58	1409.13	1200	1535.9
	700	1946.69	1513	1300	1478.36
Figure 1-figure supplement 1E
	J774A.1
β-glucan	-	+	+	+
	siScr	siScr	siAurka#1	siAurka#1
	188.615	257.48	163.02	96.2884
	209.031	287.037	191.967	110
	222.134	280.333	178.255	112.133
	THP-1
β-glucan	-	+	+	+
	siScr	siScr	siAurka#1	siAurka#1
	154.572	742.224	437.658	474.185
	332.642	720.744	556.372	510.713
	405.697	939.907	483.317	369.17

## Sheet: Figure 3
Fig. 3B
	Glycolysis						Glycolytic Capacity
β-glucan	-	-	+	+		β-glucan	-	-	+	+
Ali	-	+	-	+		Ali	-	+	-	+
	25.96	28.62	48.84	37.92			23.8	26.1	53.36	38.02
	24.6	29.37	52.27	36.64			25.5	26.54	56.17	38.77
	30.21	35.61	52.11	36.32			30.95	26.83	56.01	35.92
Fig. 3C
β-glucan	-	+	+
Ali	-	-	+
	188.921	301.729	277.93
	203.342	287.112	291.65
	198.661	312.759	292.83
Fig. 3E
β-glucan	-	+	+
Ali	-	-	+
	109.412	113.898	68.4918
	97.0588	113.898	68.4918
	93.5294	108.72	64.7895
Fig. 3F
	serine					SAM
β-glucan	-	+	+		β-glucan	-	+	+
Ali	-	-	+		Ali	-	-	+
	378.908	388.324	382.203			874.344	1007.83	666.243
	400.483	386.247	390.344			922.02	987.98	716.305
	400.483	392.841	406.574			922.02	1011.29	452.187
Fig. 3G
	SAH					HCY
β-glucan	-	+	+		β-glucan	-	+	+
Ali	-	-	+		Ali	-	-	+
	29.8458	31.4777	21.6467			6.75173	8.25036	5.95791
	26.9207	30.0696	21.0704			6.32446	8.46368	6.06369
	27.6193	28.2995	21.5614			6.42196	8.3835	6.18917
Fig. 3J
	SAM				SAH				SAM/SAH
β-glucan	+	+		β-glucan	+	+		β-glucan	+	+
Ali	+	+		Ali	+	+		Ali	+	+
siGnmt	-	+		siGnmt	-	+		siGnmt	-	+
	394.519	468.728			21.6467	18.7227			18.4129	25.3795
	394.435	442.693			21.0704	17.7585			18.409	23.9699
	393.031	414.279			21.5614	18.9251			18.3435	22.4313
Fig. 3K
MC38 SUP	IL-6
	β-glucan	-	+	+	+
	Ali	-	-	+	+
	siGnmt	-	-	-	+
		561.2	674.613	449.742	600.308
		531.869	604.219	410.634	551.423
		496.672	610.085	412.589	539.69
	TNF
	β-glucan	-	+	+	+
	Ali	-	-	+	+
	siGnmt	-	-	-	+
		49.5727	98.4845	67.4189	89.231
		40.3192	87.248	66.758	75.3506
		46.2679	76.0115	53.5386	90.5529
	IL-6
	β-glucan	-	+	+	+
	siAurka	-	-	+	+
	siGnmt	-	-	-	+
		266.105	410.028	266.105	408.194
		260.09	451.323	305.069	331.242
		290.771	504.497	258.595	419.253
	TNF
LPS	β-glucan	-	+	+	+
	siAurka	-	-	+	+
	siGnmt	-	-	-	+
		666.962	1013.53	876.383	976.541
		620.297	936.137	849.636	926.462
		649.32	895.732	847.36	961.745

## Sheet: Figure 3_figure supplement 1
Figure 3-figure supplement 1B
	lactate					malate
β-glucan	-	+	+		β-glucan	-	+	+
Ali	-	-	+		Ali	-	-	+
	1.01087	1.15259	1.03823			0.836163	1.02612	0.894397
	0.978682	1.13322	1.04571			0.871158	0.997945	0.91077
	1.01044	1.08209	1.04004			0.816271	0.975935	0.895396
	citrate					α-KG
β-glucan	-	+	+		β-glucan	-	+	+
Ali	-	-	+		Ali	-	-	+
	0.992944	1.15645	1.08752			0.987006	1.1488	1.10846
	1.00351	1.16985	1.07813			1.03288	1.15535	1.09179
	1.00354	1.1586	1.08418			0.980115	1.13849	1.10182
	fumarate					succinate
β-glucan	-	+	+		β-glucan	-	+	+
Ali	-	-	+		Ali	-	-	+
	0.98842	1.19141	1.06724			0.975044	1.14931	1.03707
	1.00494	1.16456	1.08546			1.00914	1.14066	1.03658
	1.00664	1.13811	1.0903			1.01582	1.15986	1.0325
Figure 3-figure supplement 1C
	unlabeled					labeled
β-glucan	-	+	+		β-glucan	-	+	+
Ali	-	-	+		Ali	-	-	+
	36985904	36077238	63613740			15503009	15621008	26099188
	38641965	34590752	73003253			16203941	15229083	30540400
	33226168	36638227	60737677			14473183	15710149	24794790

## Sheet: Figure 4
Fig. 4B
		Il6						Tnf
H3K36me3	β-glucan	-	+	+	+		β-glucan	-	+	+	+
	Ali	-	-	+	+		Ali	-	-	+	+
	siGnmt	-	-	-	+		siGnmt	-	-	-	+
		1.222	9.269	3.093	3.915			1.0724	2.267	0.5513	3.4441
		0.806	7.123	1.071	4.053			1.3202	4.1433	0.6693	2.7022
		0.972	9.797	1.086	4.435			0.6074	1.816	0.5288	2.1348
		Il6						Tnf
H3K4me3	β-glucan	-	+	+	+		β-glucan	-	+	+	+
	Ali	-	-	+	+		Ali	-	-	+	+
	siGnmt	-	-	-	+		siGnmt	-	-	-	+
		0.96631	1.89722	0.75117	1.7866			0.902	8.867	3.711	7.371
		1.24881	1.79488	0.58936	1.36341			0.786	7.936	3.869	7.684
		0.78488	1.45789	0.55757	1.0477			1.312	9.636	3.391	9.138

## Sheet: Figure 4_figure supplement 1
Figure 4-figure supplement 1
	H3K4me1
β-glucan	-	-	+	+
Ali	-	+	-	+
	1	1.15	0.712031	0.655095
	1	1.03	1.25451	1.31751
	1	1.01	0.849002	0.929573
	H3K9me3
β-glucan	-	-	+	+
Ali	-	+	-	+
	1	1.16	1.09342	1.18083
	1	0.89	1.192	0.911213
	1	1.01	1.21258	1.35336
	H3K36me3
β-glucan	-	-	+	+
Ali	-	+	-	+
	1	1.07	1.58647	1.05901
	1	1.19	1.52158	1.14587
	1	0.7	1.8	1.2
	H3K4me3
β-glucan	-	-	+	+
Ali	-	+	-	+
	1	1.11	2.2044	1.184
	1	1.2	1.7	0.8
	1	0.85	1.9	1.1
	H3K27me3
β-glucan	-	-	+	+
Ali	-	+	-	+
	1	0.9	1.09965	1.08165
	1	1.1	1.27131	1.30365
	1	1.05	1.2	0.95

## Sheet: Figure 5
Fig. 5D
MC38 SUP	β-glucan	-	+	+	+	+
	Ali	-	-	+	+	+
	siFoxo3	-	-	-	#1	#2
		182.694	540.677	166.33	311.947	384.665
		260.318	672.312	217.855	391.958	342.971
		283.517	704.418	170.266	376.682	289.973
LPS	β-glucan	-	+	+	+	+
	Ali	-	-	+	+	+
	siFoxo3	-	-	-	#1	#2
		689.865	2095.78	1339.68	2676.89	2328.28
		883.877	2007.92	1387.43	2451.6	2393.45
		906.157	1807.29	1556.62	2676.89	2385.23
Fig. 5H
IL-6									TNF
β-glucan	-	+	+	+	+	+		β-glucan	-	+	+	+	+	+
siAurka	-	-	+	+	+	+		siAurka	-	-	+	+	+	+
MHY1485	-	-	-	-	+	+		MHY1485	-	-	-	-	+	+
	169.754	334.724	179.322	134.804	254.725	272.549			236.603	452.562	326.955	370.463	510.359	538.01
	167.225	258.333	186.208	132	257.682	282.45			230.737	492.761	400.857	408.679	500.582	459.519
	171.043	392.466	158.647	190.627	255.65	260.532			144.425	495.361	402.589	330.188	555.334	469.296
IL-6									TNF
β-glucan	-	+	+	+	+	+		β-glucan	-	+	+	+	+	+
Ali	-	-	+	-	-	+		Ali	-	-	+	-	-	+
MHY1485	-	-	-	-	+	+		MHY1485	-	-	-	-	+	+
	103.141	174.649	106.619	107.329	247	203.158			81.2953	175.148	97.3534	119.497	137.854	156.869
	80.3961	209.333	92.5513	73.4052	178.091	165.62			58.759	147.044	102.609	56.7127	189.021	152.013
	54.9299	199.333	100.831	80.1906	167.245	220.998			64.1688	151.477	82.9787	73.6306	181.669	192.662

## Sheet: Figure 6
Fig. 6B
tumor volumn	PBS+Vehicle						β-glucan+Vehicle						β-glucan+Ali
day 7	142.284	32.4824	72.7919	30.2863	75.7097		37.0784	85.1202	23.952	22.5665	39.1324		56.5808	150.566	114.484	118.588	37.0229
day 11	387.866	313.365	387.202	98.0361	175.037		121.958	248.815	123.245	86.0404	95.0826		116.999	189.874	215.042	237.25	278.713
day 14	629.437	312.29	423.569	155.914	174.564		166.166	277.543	129.647	76.7657	101.411		119.885	209.255	326.587	430.043	310.475
day 17	551.362	509.921	527.782	169.946	249.178		162.316	487.09	212.847	73.1597	103.139		148.835	341.175	424.85	647.499	483.793
day 20	839.187	854.71	717.962	266.112	301.709		216.81	551.243	254.623	85.7269	56.803		96.0719	400.069	601.937	1085.57	596.119
Fig. 6D
tumor volumn	PBS+Vehicle								β-glucan+Vehicle								β-glucan+Ali
day 7	0	25.3265	0	13.5	0	0	13.5		0	13.5	0	13.5	0	0	0		32	7.8125	31.5	13.815	0	4	13.5
day 10	100	60.025	84	121.12	107.273	13.5	81.5		13.5	33.6595	13.5	0	62.5	48	54.684		80	157.5	70.875	73.872	71.4367	32	75
day 13	112.5	90.75	217.588	127.5	249.86	87.5	157.644		62.622	65	45.6	0	70.6811	94.62	101.82		113.4	186.48	91.25	126	126.405	80	156.06
day 15	123.547	93.775	274.4	148.074	226.8	111.6	153.125		113.144	69.1875	40	0	70.304	147.875	121.835		130.979	150	88.36	133.384	203.185	183.34	182.5
day 17	162	62.5	416	194.595	318.812	126	230.682		103.933	117.75	78.5	0	128.993	143.024	160.257		134.886	166.728	240.1	184.873	286.65	180.9	379.634
day 19	180	87.1335	393.75	232.459	340.55	148.84	337.928		106.25	123.78	129.031	0	109.76	237.276	170.582		154.213	149.259	238.05	246.25	325.144	166.375	398.44
Fig. 6E	myeloid cells				macrophages
β-glucan	-	+	+		-	+	+
Ali	-	-	+		-	-	+
	80.24	62.63	85.94		24.54	17.36	23.53
	60.5	63.89	71.5		13.29	16.68	15.93
	60.8	70.33	77.77		9.33	19.04	22.16
	64.34	87.05	79.9		18.89	32.37	20.39
	63.76	66.1	72.54		10.38	19.72	17.54
Fig. 6G
β-glucan	-	+	+		-	+	+
Ali	-	-	+		-	-	+
	4.15	6.23	4.1		93.6	129	93.1
	2.68	7.51	5.75		81.5	152	136
	1.88	7.94	3.46		71.1	151	81.4
	8.25	9.36	3.82		157	189	92.2
	5.92	11.9	3.83		120	226	85.9
Fig. 6H
β-glucan	-	+	+
Ali	-	-	+
	76.2473	107.926	63.6028
	77.9728	194.874	65.7648
	135.859	99.6569	75.4525
	148.565	109.688	67.6444
	104.758	181.762	63.6219
Fig. 6I
β-glucan	-	+	+		-	+	+
Ali	-	-	+		-	-	+
	16.12	21.65	16.57		39.4	44.6	42.6
	15.5	23.18	15.05		37.8	47.2	31.9
	15.83	19.72	15.74		38.8	46.1	32
	12.22	19.72	12.99		31.9	43.3	34.4
	18.32	19.84	13.01		38.3	43.9	31.4

## Sheet: Figure 6_figure supplement 1
Figure 6-figure supplement 1E
	IL-1β					IL-12p70
β-glucan	-	+	+		β-glucan	-	+	+
Ali	-	-	+		Ali	-	-	+
	248.995	319.479	329.109			36.2506	224.716	97.8056
	414.471	500.825	183.437			123.219	191.843	135.036
	230.56	583.827	236.39			75.2995	170.043	101.545
	141.307	416.391	100.106			160.514	187.548	92.1387
	376.056	307.971	254.125			151.033	226.621	145.866
